# Supplementary material for: Total syntheses of disulphated glycosphingolipid SB1a and the related monosulphated SM1a
Source: Royal Society of Chemistry journal article supplement (doi:10.1039/c5ob01744k), 2015-01-01
Supplement: c5ob01744k1.pdf [file c5ob01744k1.pdf]

## Supporting Information

---

# Total syntheses of disulphated glycosphingolipid SB1a and the related monosulphated SM1a

---

**Haruka Hirose,<sup>a</sup> Hideki Tamai,<sup>a</sup> Chao Gao,<sup>c</sup> Akihiro Imamura,<sup>\*,a</sup> Hiromune Ando,<sup>a,b</sup>  
Hideharu Ishida,<sup>a</sup> Ten Feizi,<sup>c</sup> and Makoto Kiso,<sup>\*,a,b</sup>**

<sup>a</sup> *Department of Applied Bioorganic Chemistry, Faculty of Applied Biological Sciences, Gifu University,  
1-1 Yanagido, Gifu-shi, Gifu 501-1193, Japan*

<sup>b</sup> *Institute for Integrated Cell-Material Sciences (WPI-iCeMS), Kyoto University, 69 Konoe-cho, Yoshida,  
Sakyo-ku, Kyoto 606-8501, Japan*

*and*

<sup>c</sup> *Glycosciences Laboratory, Department of Medicine, Imperial College London, Hammersmith Campus,  
Du Cane Road, London W12 0NN, UK*

## Contents

1. Copies of <sup>1</sup>H and <sup>13</sup>C NMR spectra of new compounds

8.021  
8.006  
8.004  
7.989  
7.985  
7.985  
7.581  
7.572  
7.570  
7.479  
7.463  
7.447  
7.430  
7.203  
7.198  
7.194  
7.188  
7.174  
7.167  
7.162  
7.160  
7.146  
6.888  
6.884  
6.875  
6.870  
6.600  
6.596  
6.587  
6.582

5.740  
5.724  
5.721  
5.705

4.926  
4.910  
4.895  
4.882  
4.732  
4.723  
4.707  
4.682  
4.666  
4.659  
4.643  
4.590  
4.565  
4.160  
3.971  
3.962  
3.958  
3.956  
3.946  
3.762  
3.755  
3.742  
3.671

2.755

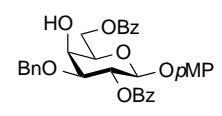

9

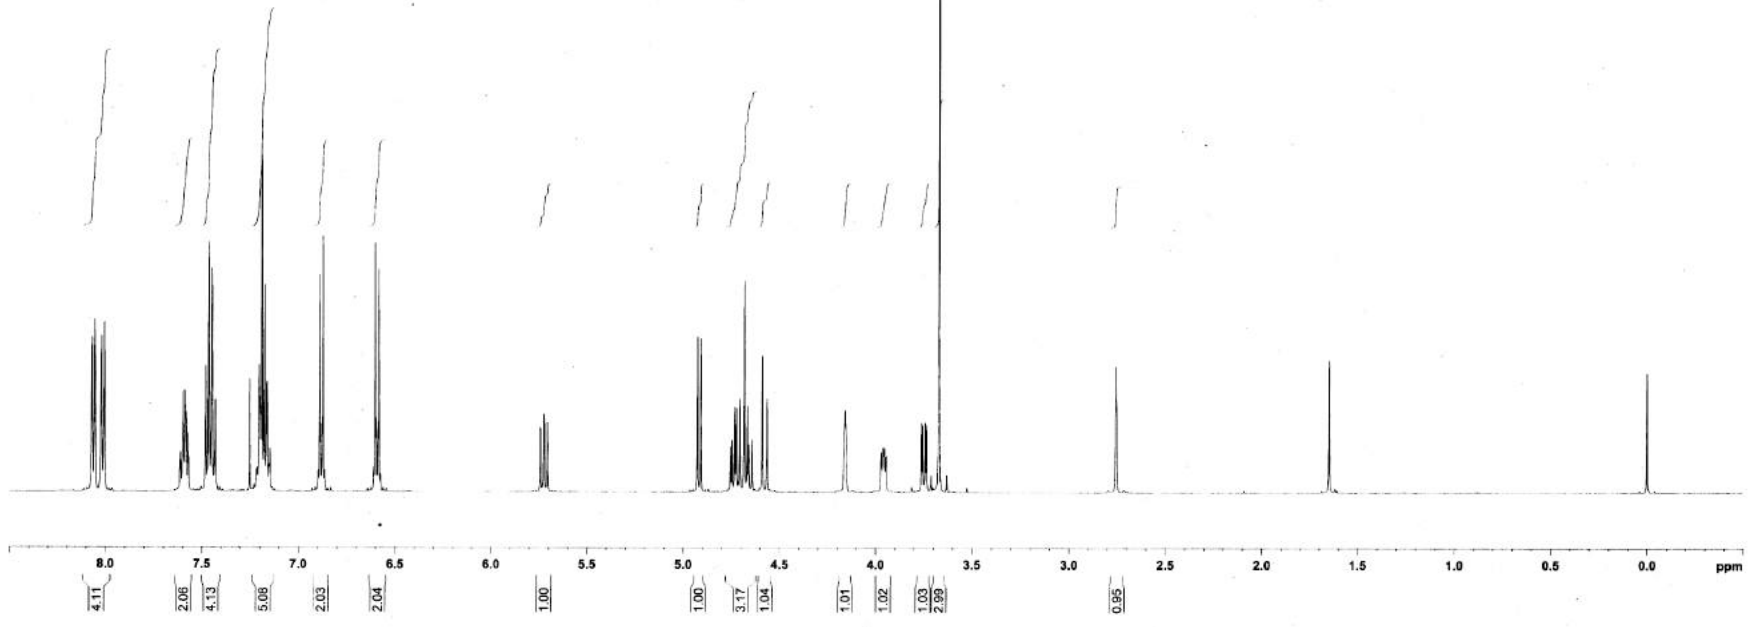

166.33  
165.32

155.40  
151.34

136.89  
133.20  
133.13  
129.86  
129.80  
129.74  
128.49  
128.41  
128.38  
128.09  
127.89  
118.77  
114.28

100.88

78.20  
72.56  
71.75  
70.99  
66.19  
63.55

55.51

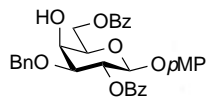

9

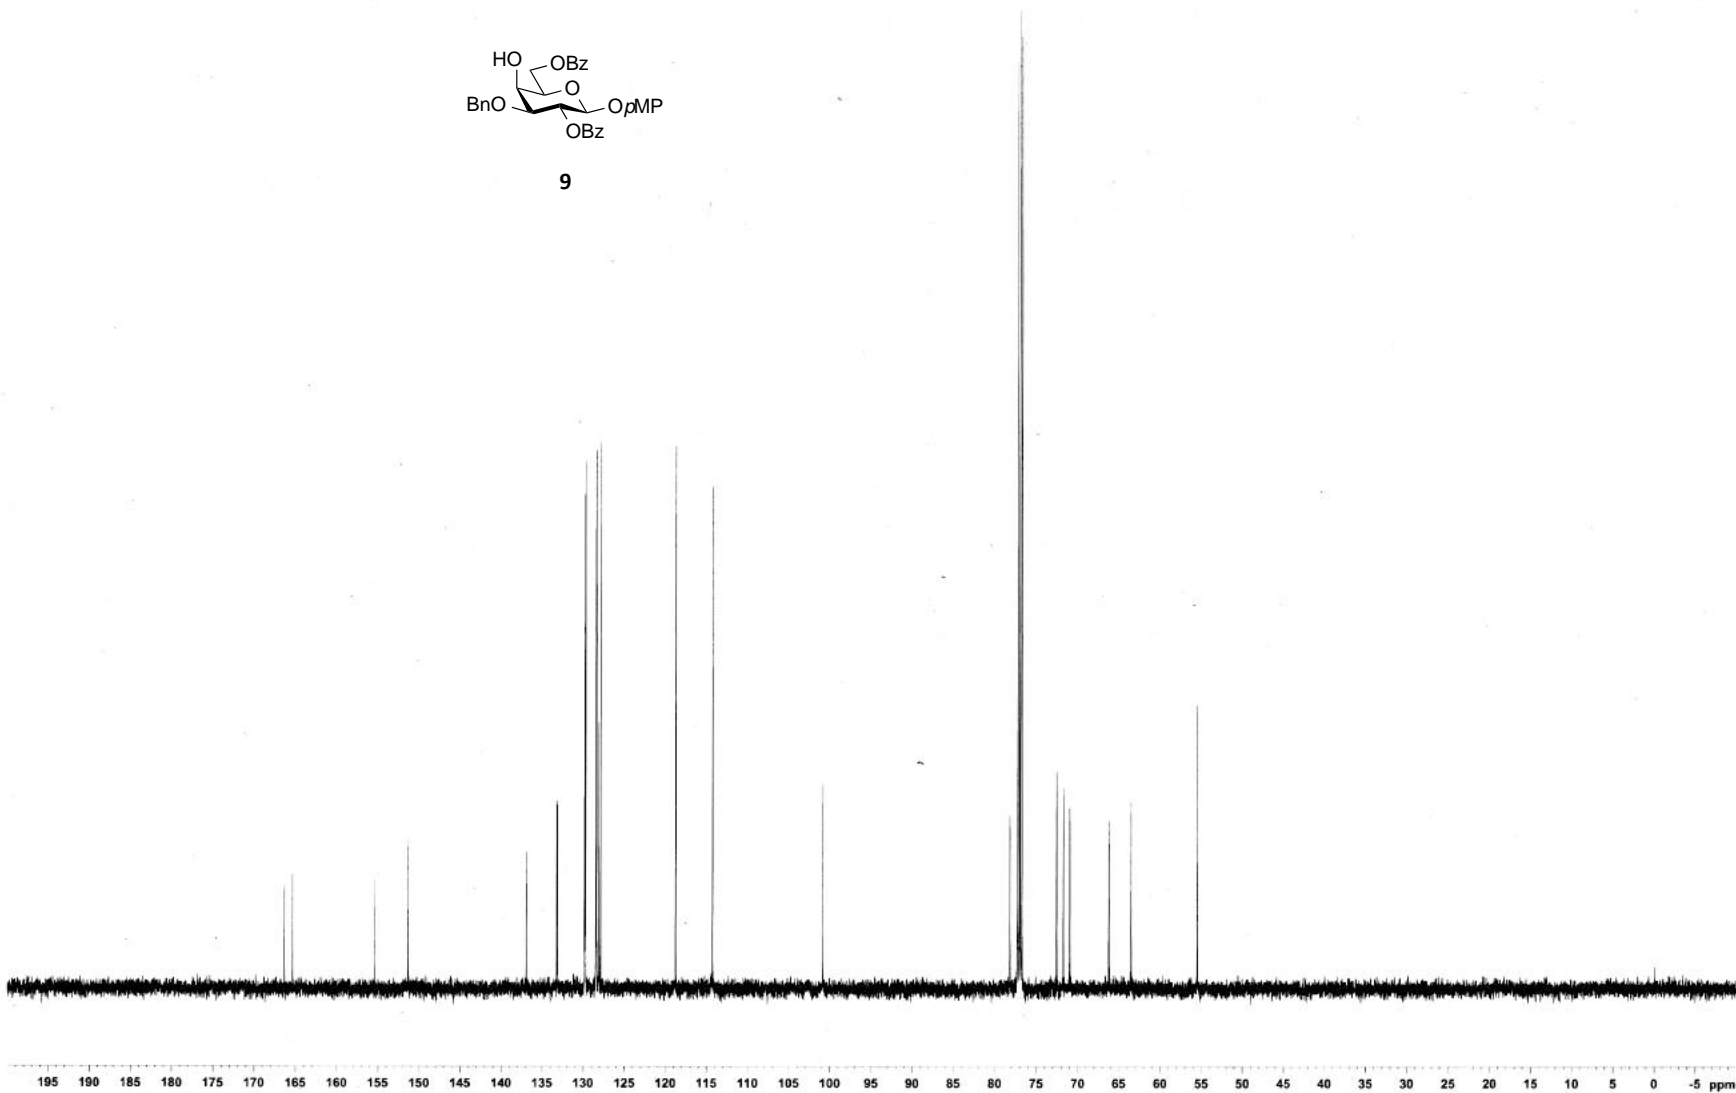

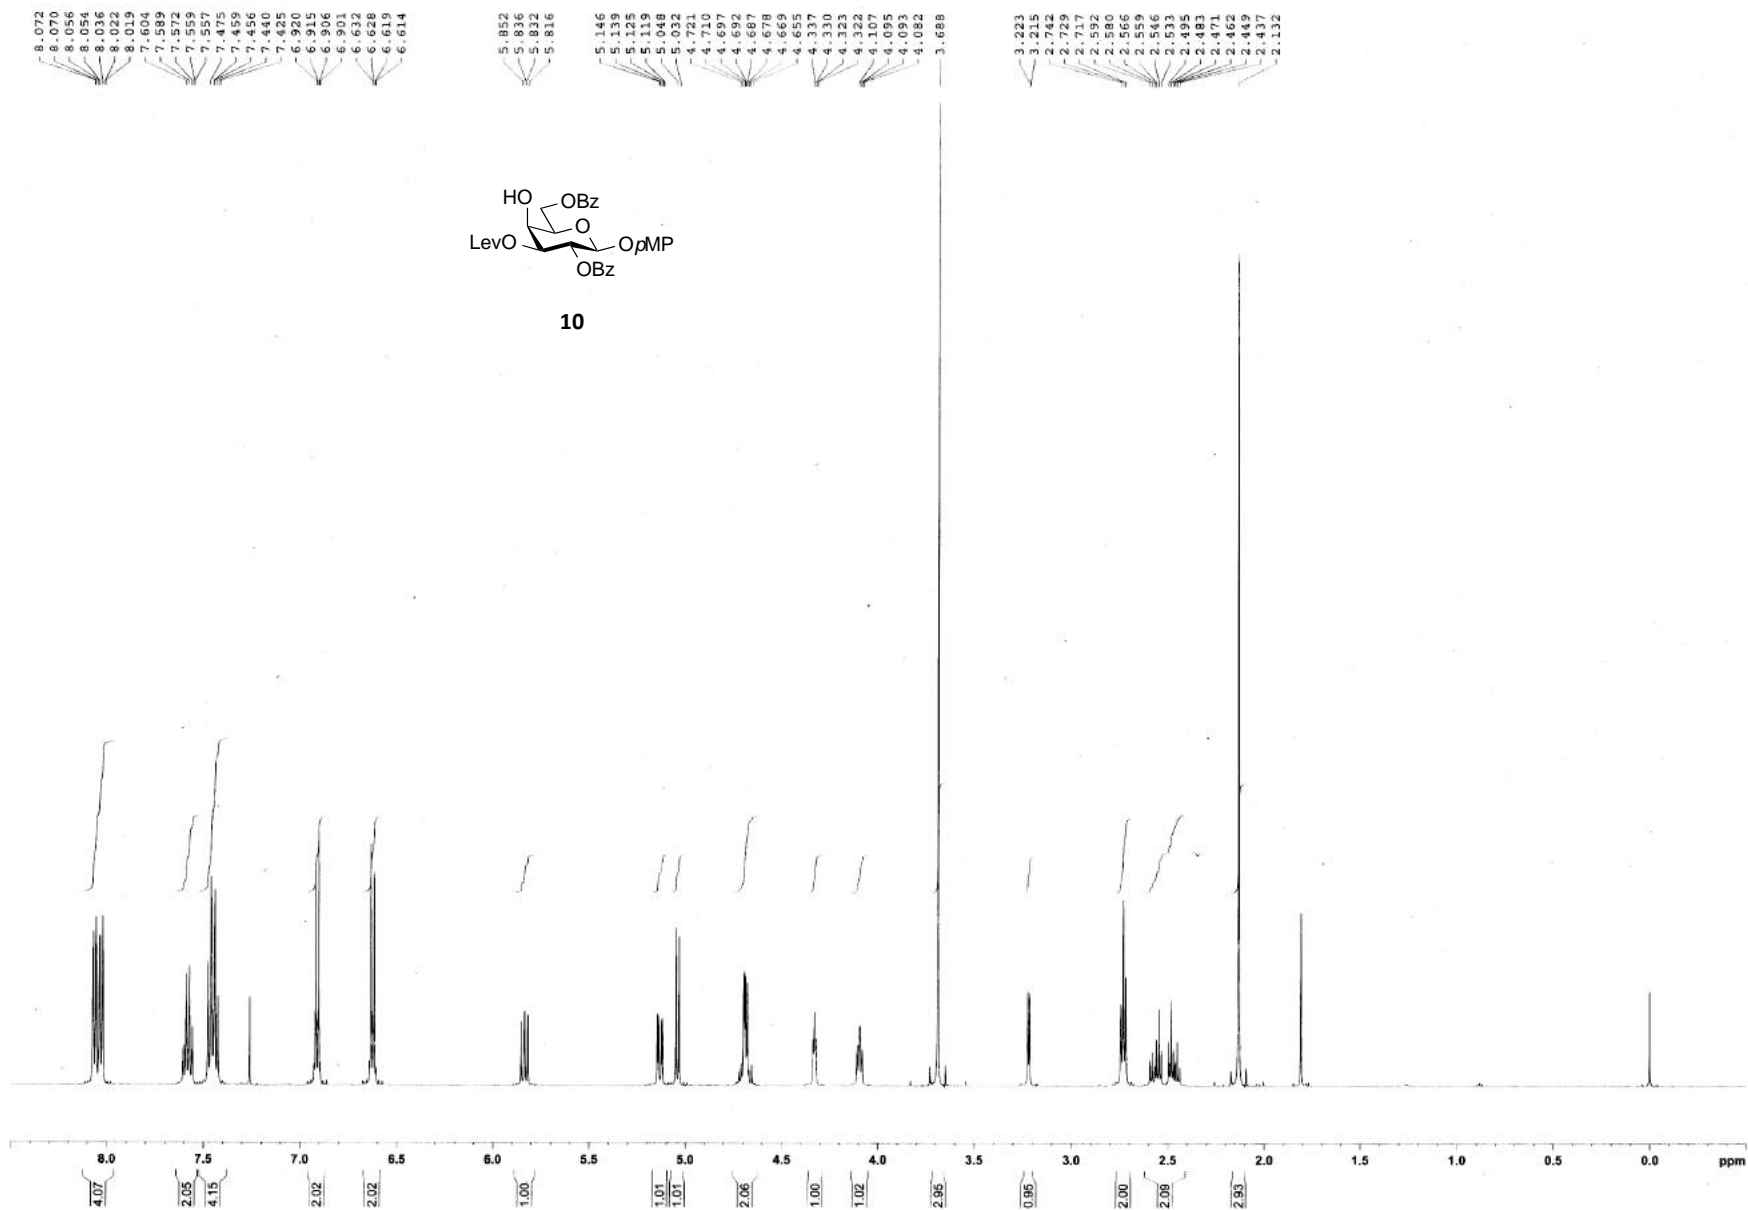

—208.00

—171.89

—166.25

—165.28

—155.53

—151.21

—133.25

—133.19

—129.78

—129.74

—129.53

—128.43

—128.40

—118.88

—114.33

—101.03

—74.08

—72.81

—69.41

—66.64

—63.22

—55.51

—38.22

—39.62

—38.25

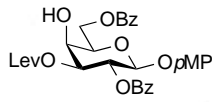

10

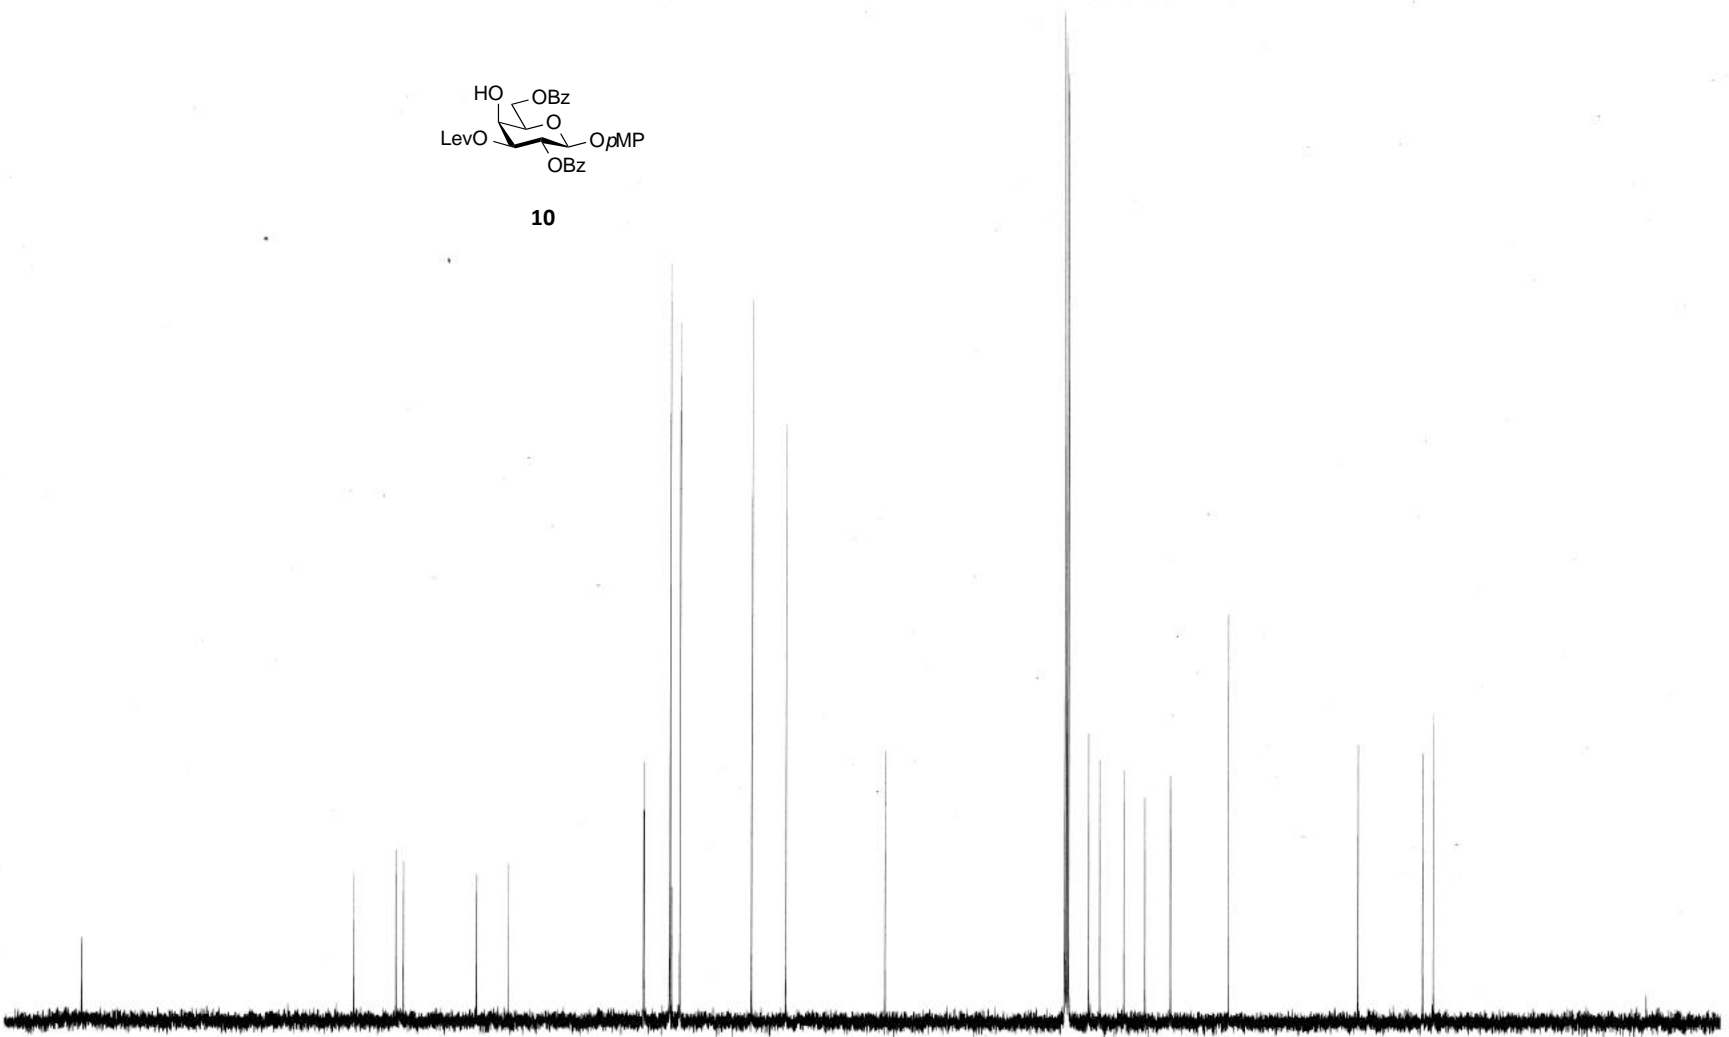

215 210 205 200 195 190 185 180 175 170 165 160 155 150 145 140 135 130 125 120 115 110 105 100 95 90 85 80 75 70 65 60 55 50 45 40 35 30 25 20 15 10 5 0 ppm

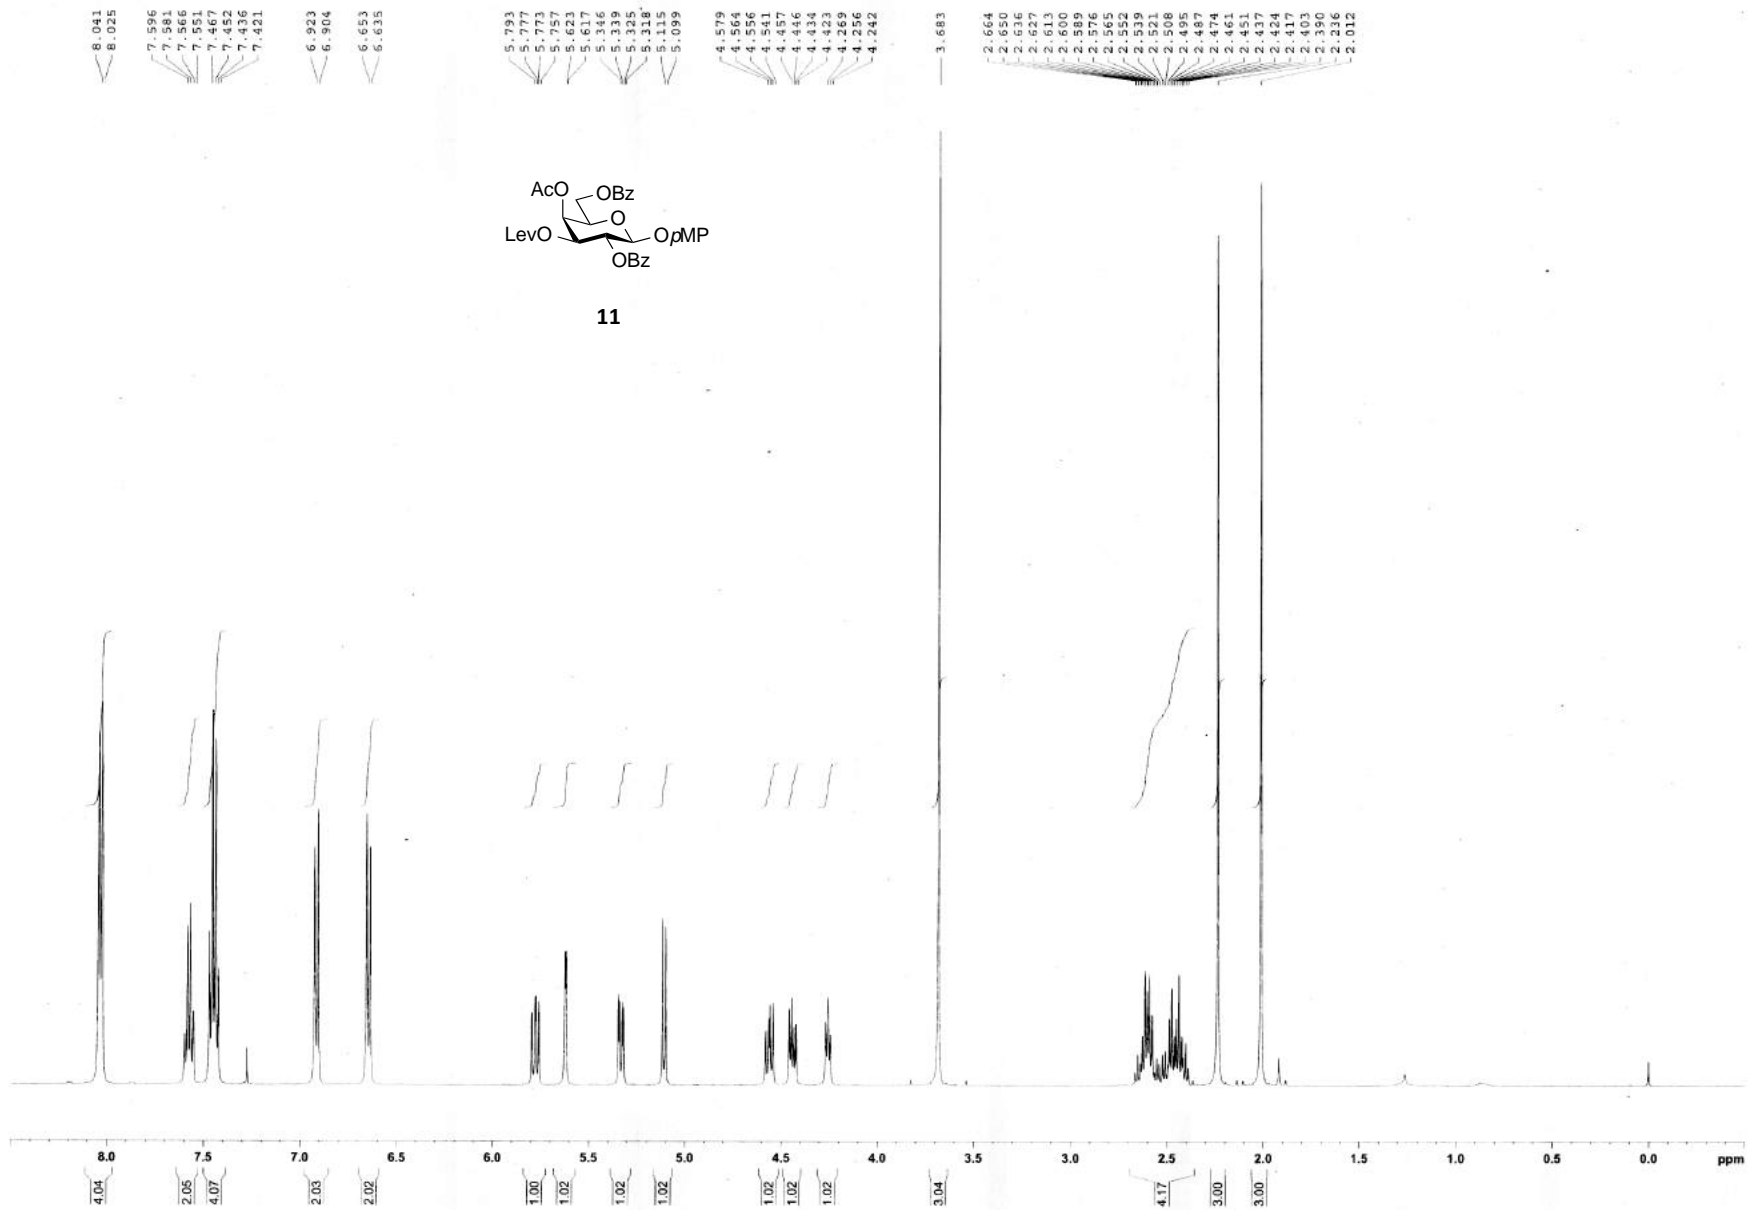

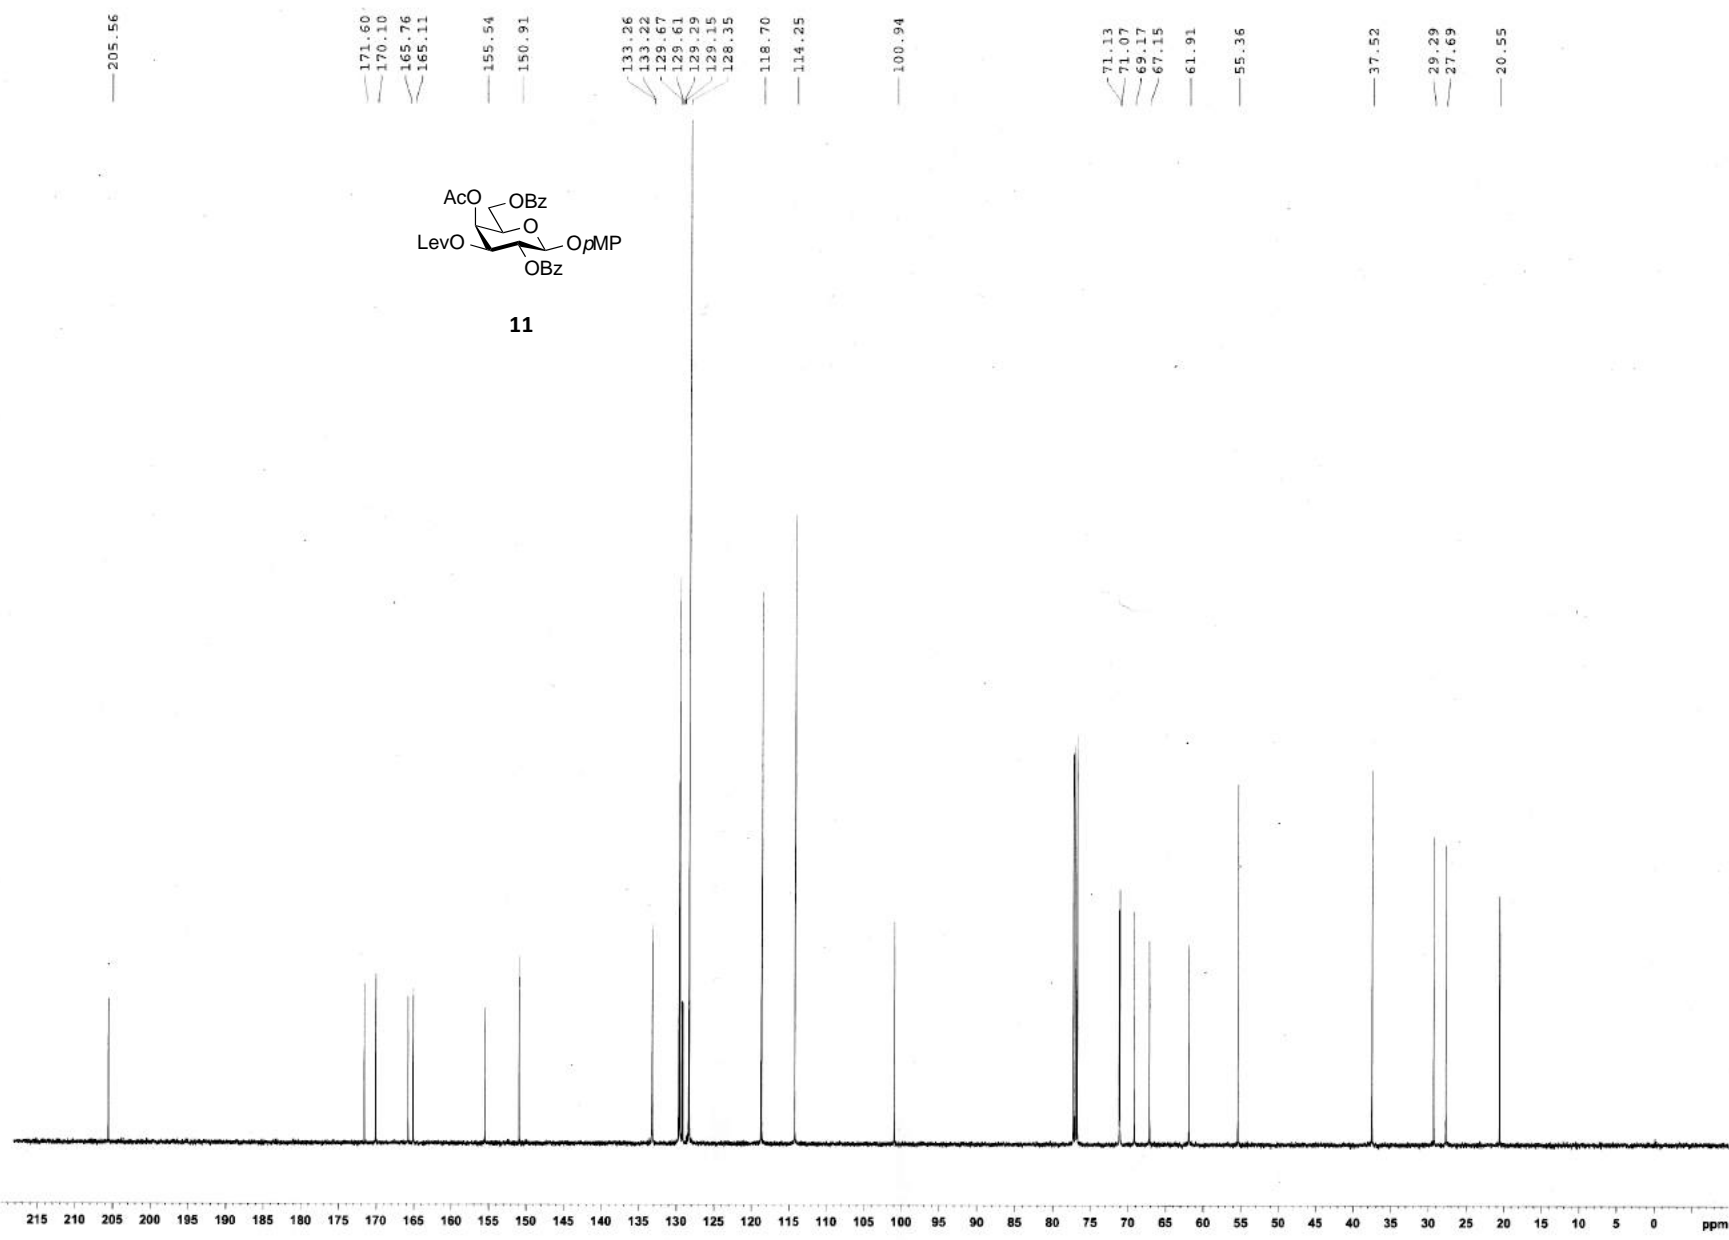

11

215 210 205 200 195 190 185 180 175 170 165 160 155 150 145 140 135 130 125 120 115 110 105 100 95 90 85 80 75 70 65 60 55 50 45 40 35 30 25 20 15 10 5 0 ppm

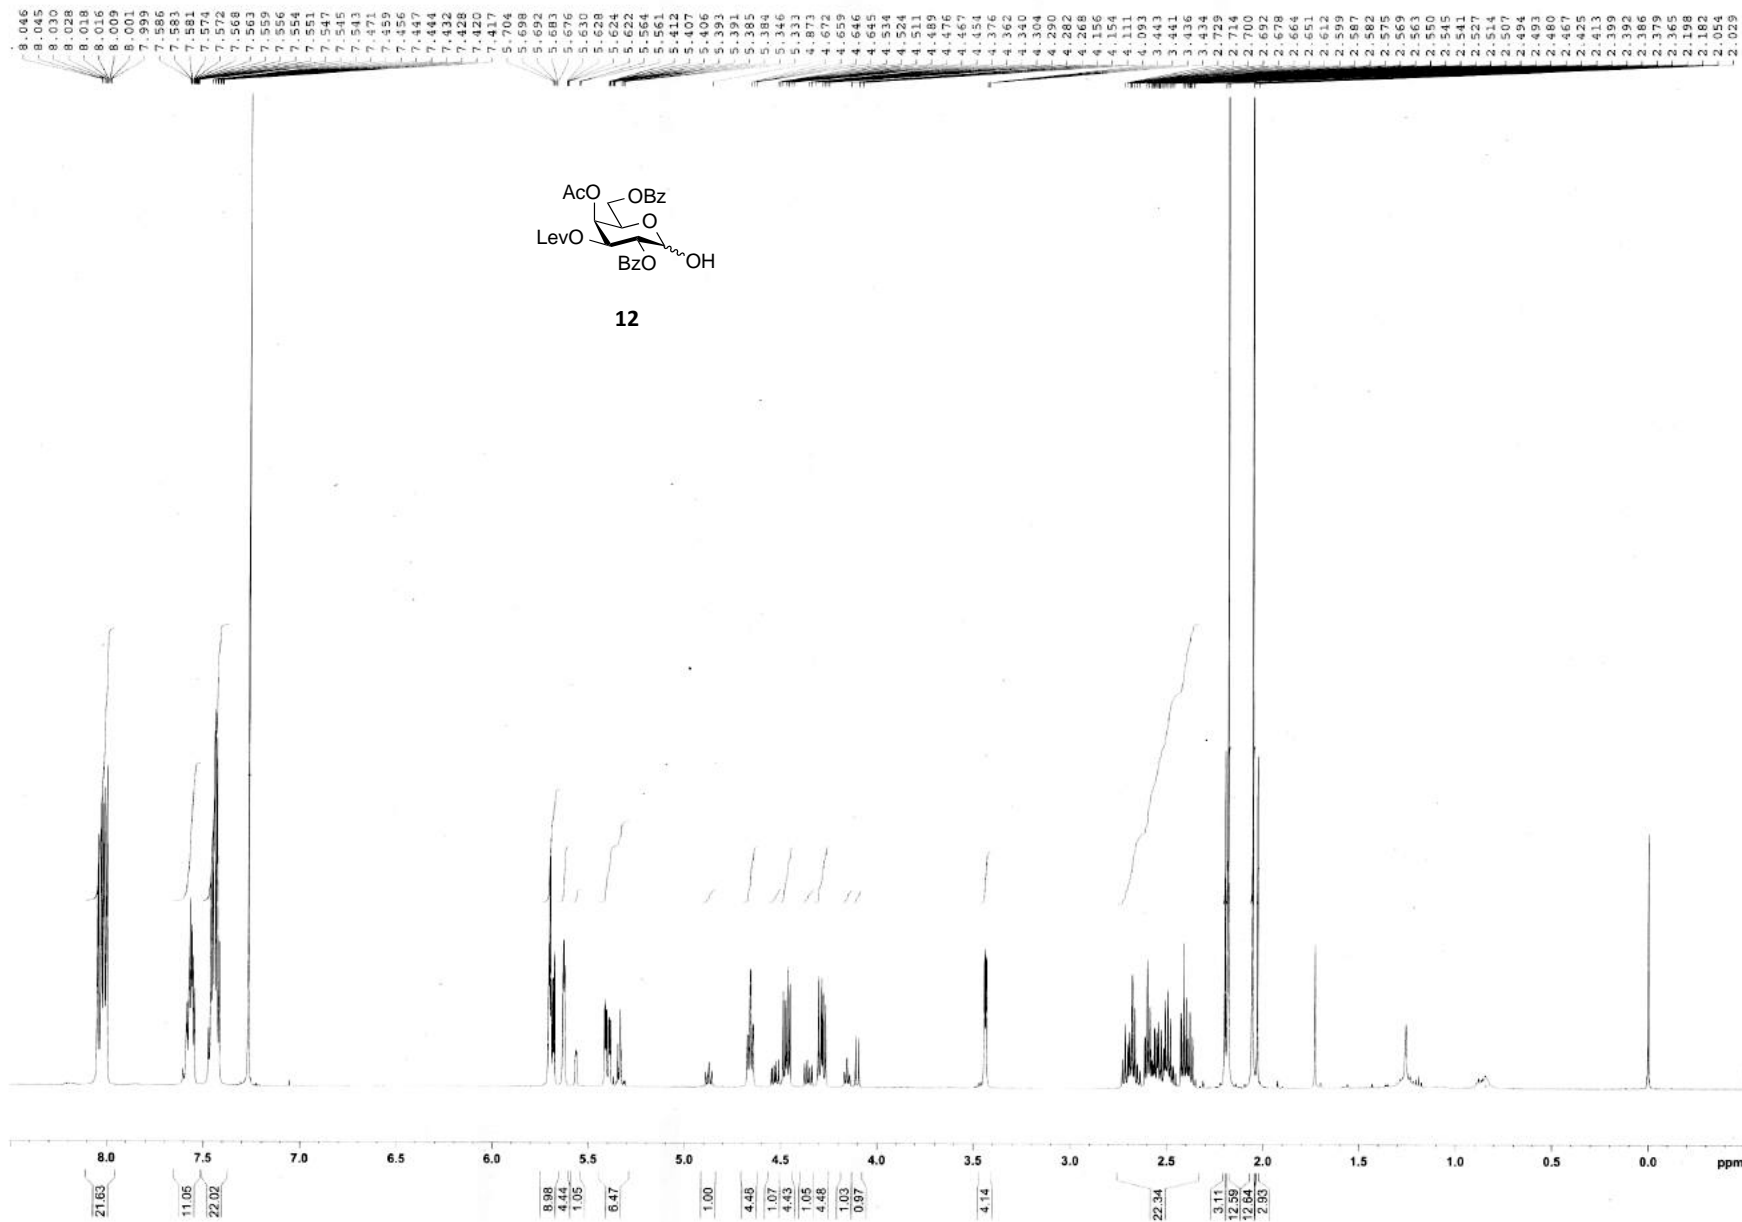



—206.01

171.84  
170.25  
166.08  
166.01

133.70  
133.48  
133.28  
129.99  
129.91  
129.75  
129.59  
129.16  
128.50  
128.43

96.17  
90.85

77.20  
71.89  
71.13  
70.52  
69.05  
68.44  
67.48  
67.38  
66.37  
62.09  
61.78

37.74  
37.66  
29.56  
29.47  
27.80  
27.70  
20.68  
20.64

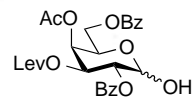

12

215 210 205 200 195 190 185 180 175 170 165 160 155 150 145 140 135 130 125 120 115 110 105 100 95 90 85 80 75 70 65 60 55 50 45 40 35 30 25 20 15 10 5 0 ppm

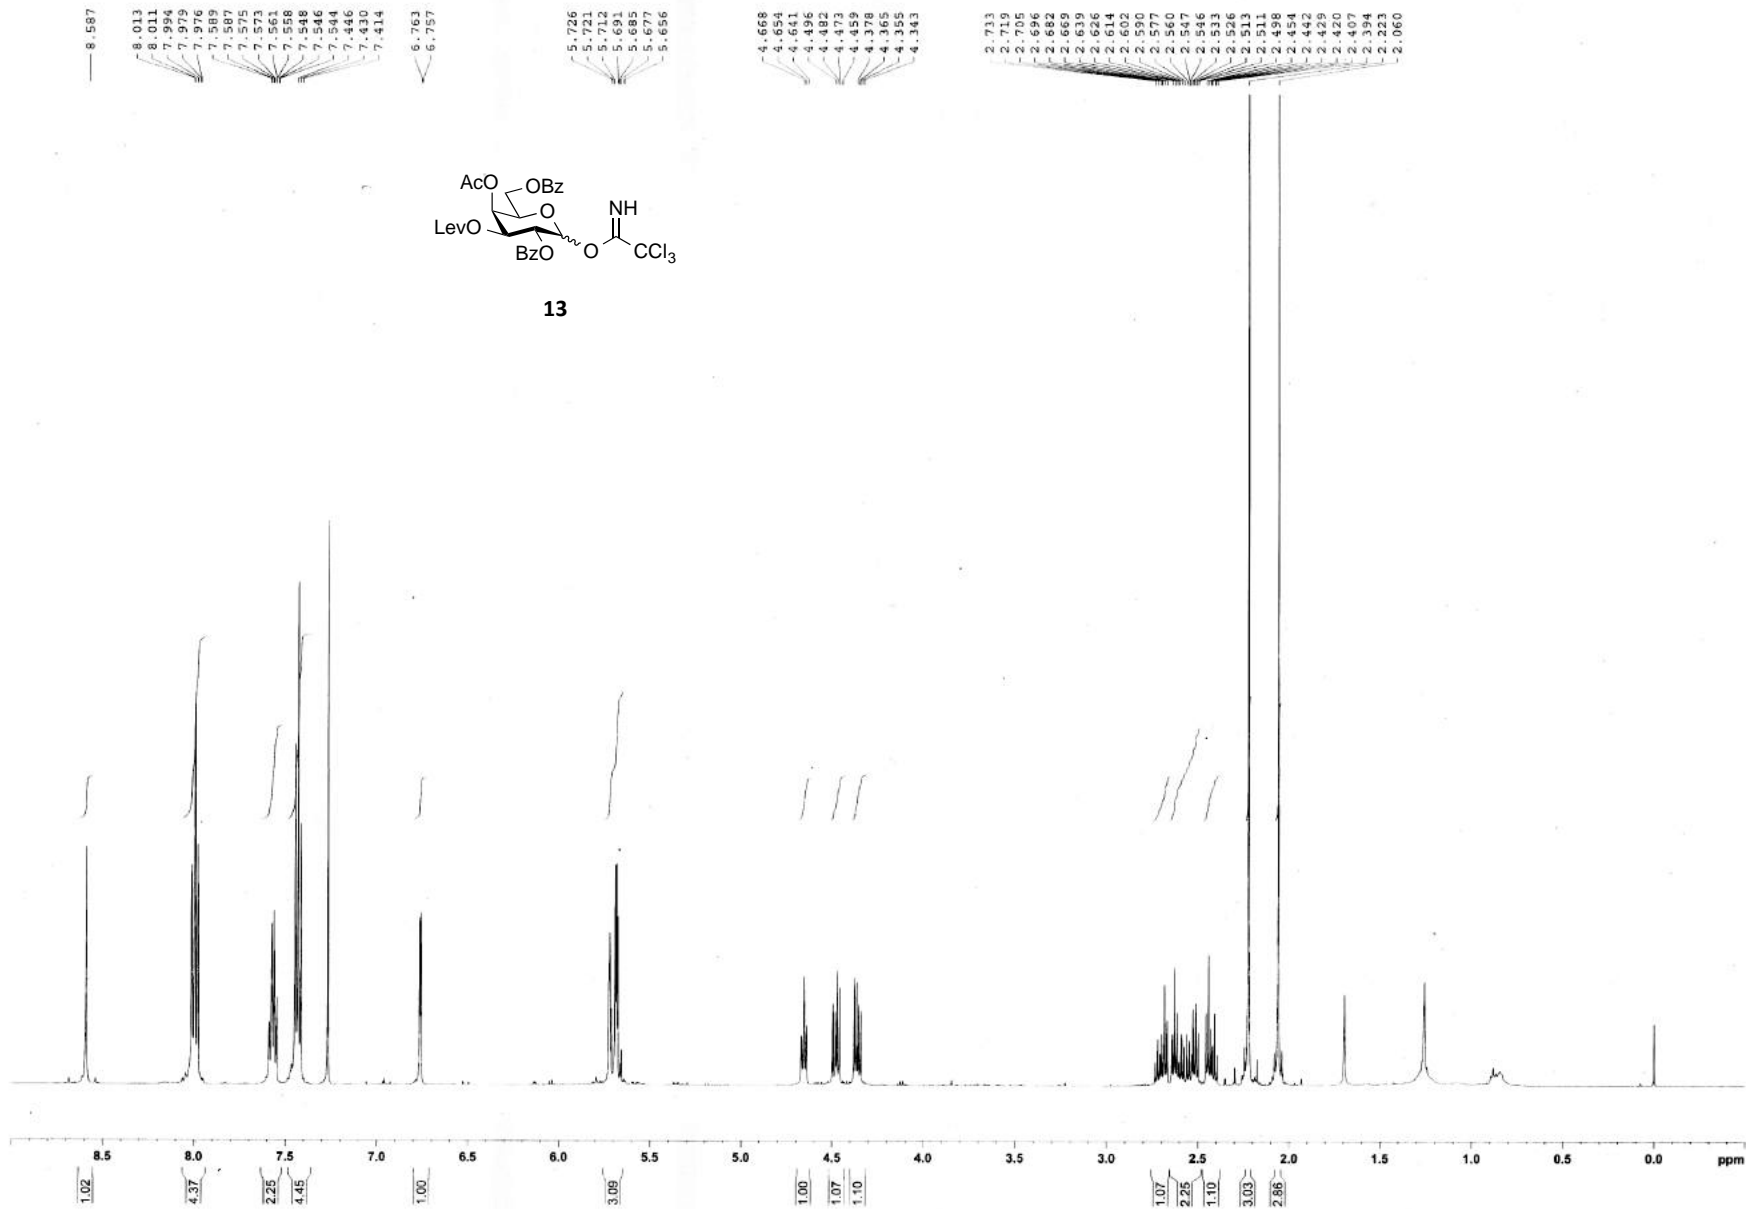

—205.76

171.74  
170.06  
165.84  
165.54  
160.50

133.57  
133.26  
129.87  
129.69  
129.30  
128.73  
128.45  
128.38

93.56  
90.68

77.20  
69.27  
67.81  
67.69  
67.36  
61.89

37.66

29.52  
27.73

20.64

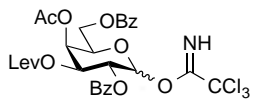

13

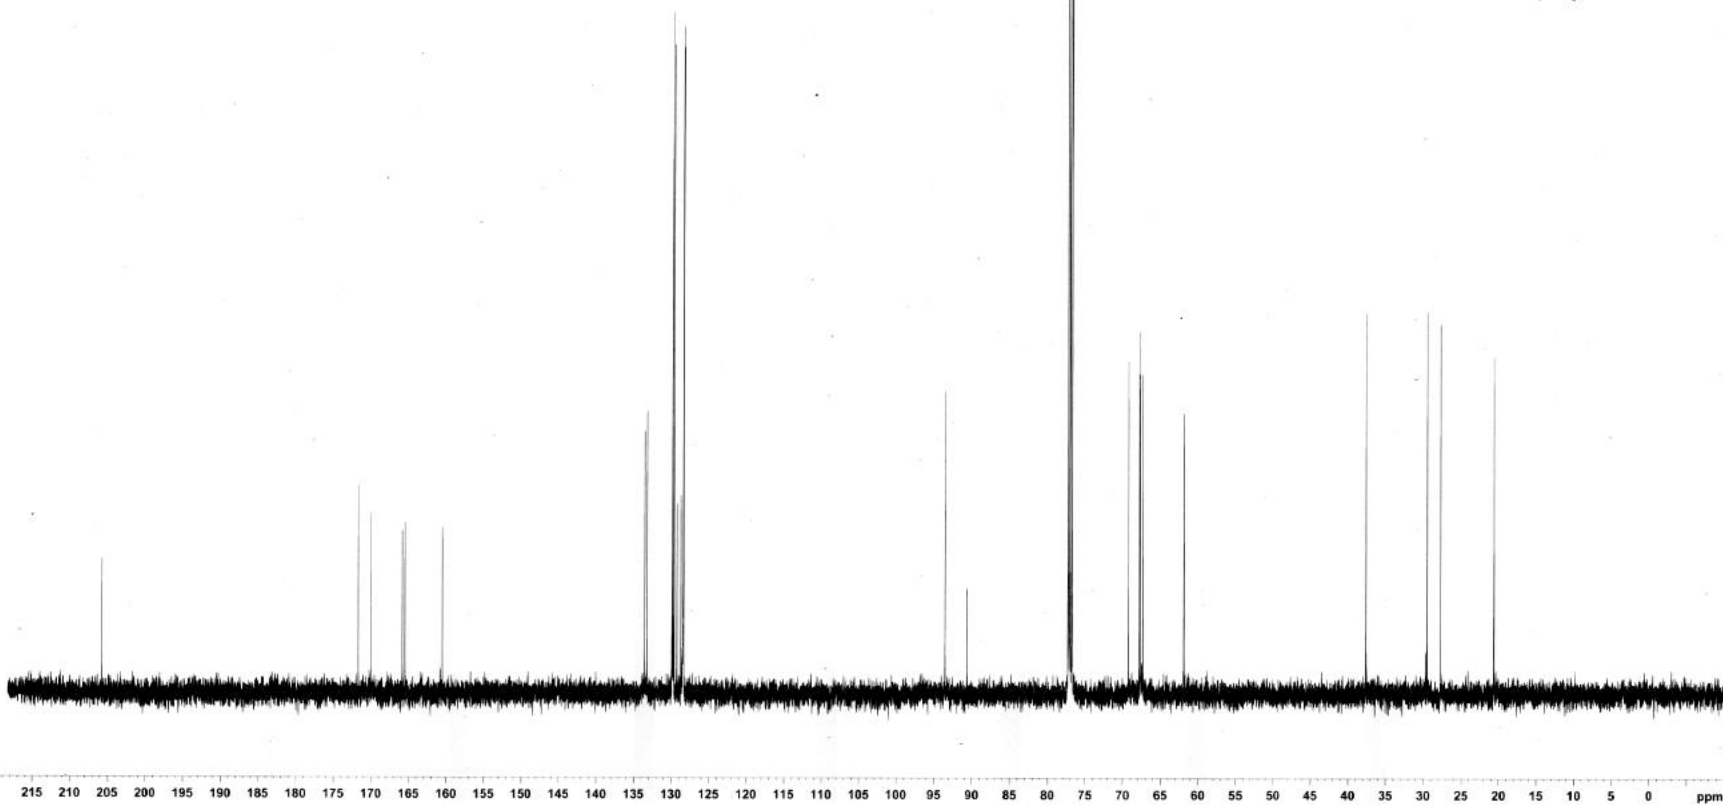

215 210 205 200 195 190 185 180 175 170 165 160 155 150 145 140 135 130 125 120 115 110 105 100 95 90 85 80 75 70 65 60 55 50 45 40 35 30 25 20 15 10 5 0 ppm

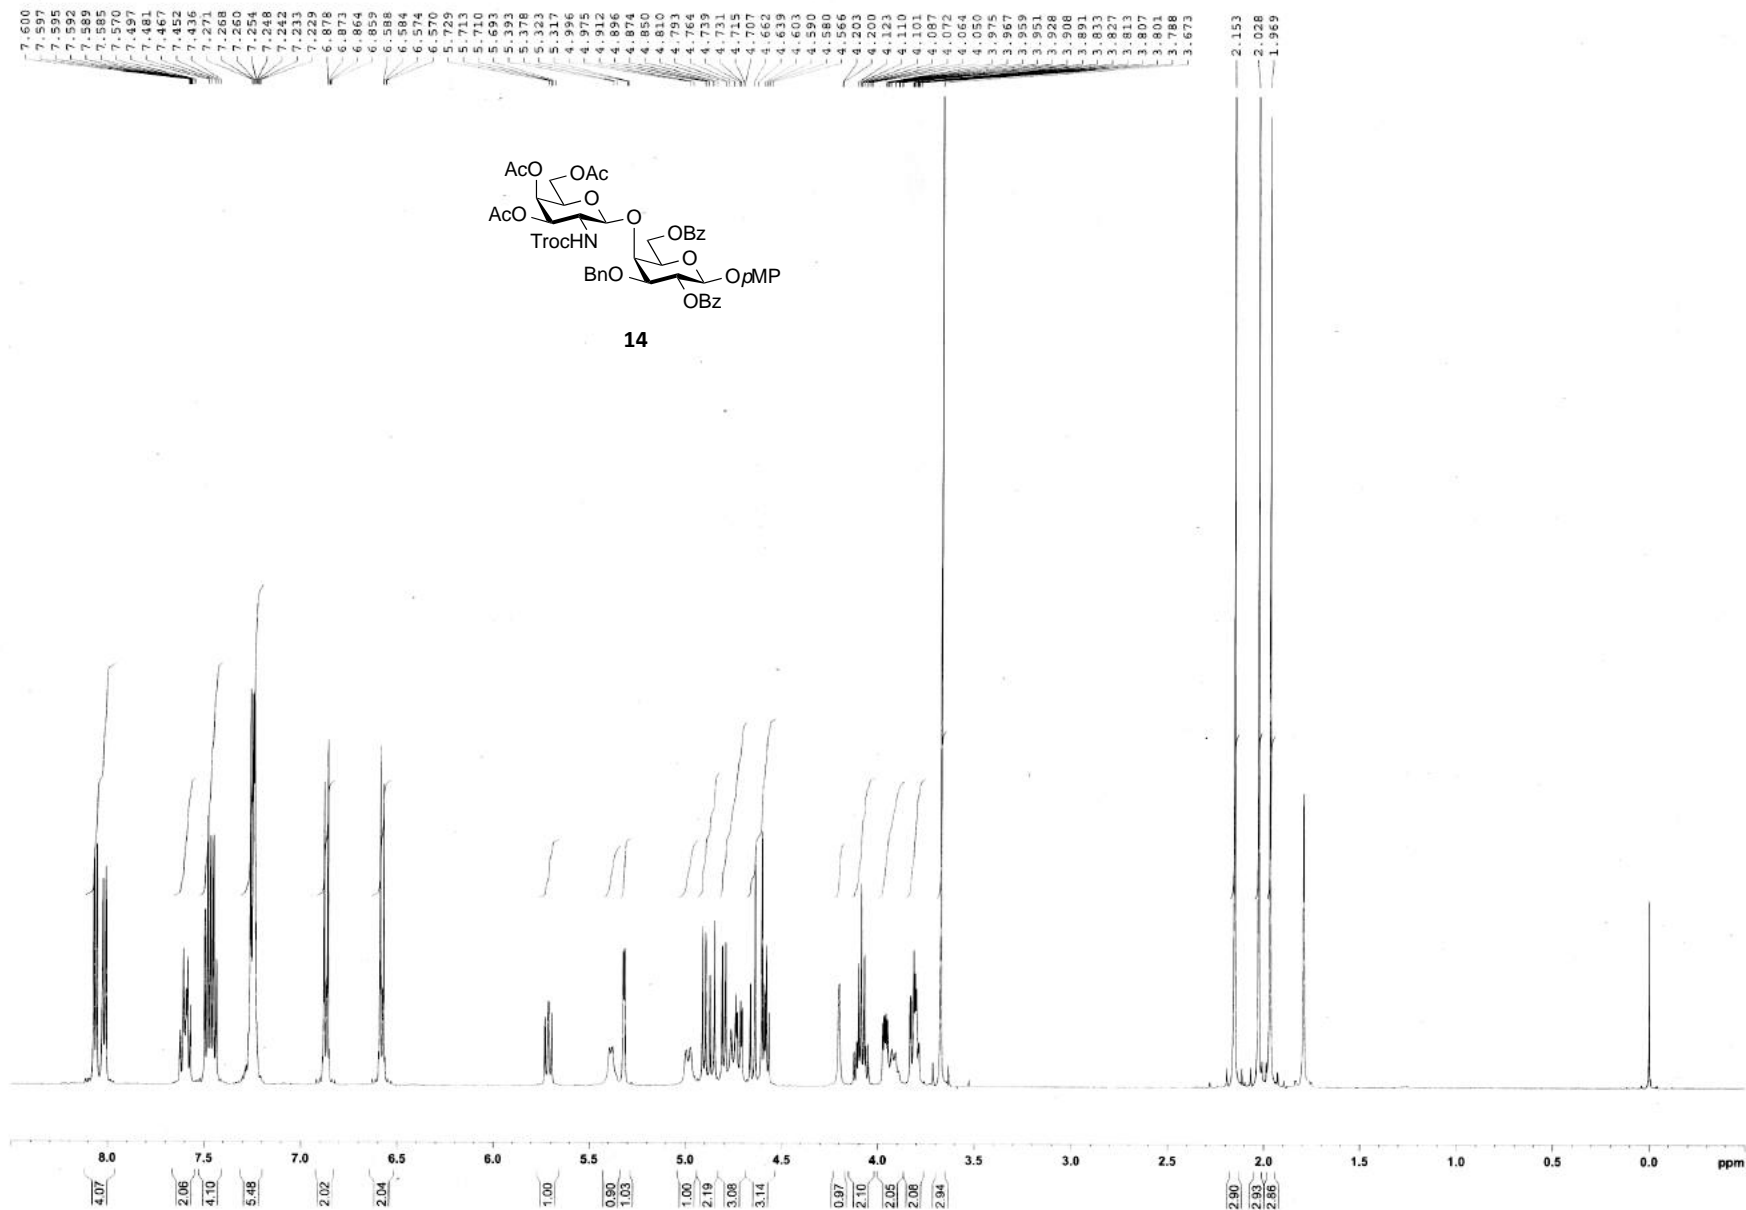

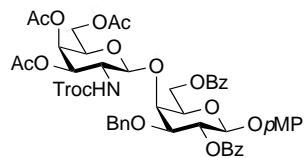

14

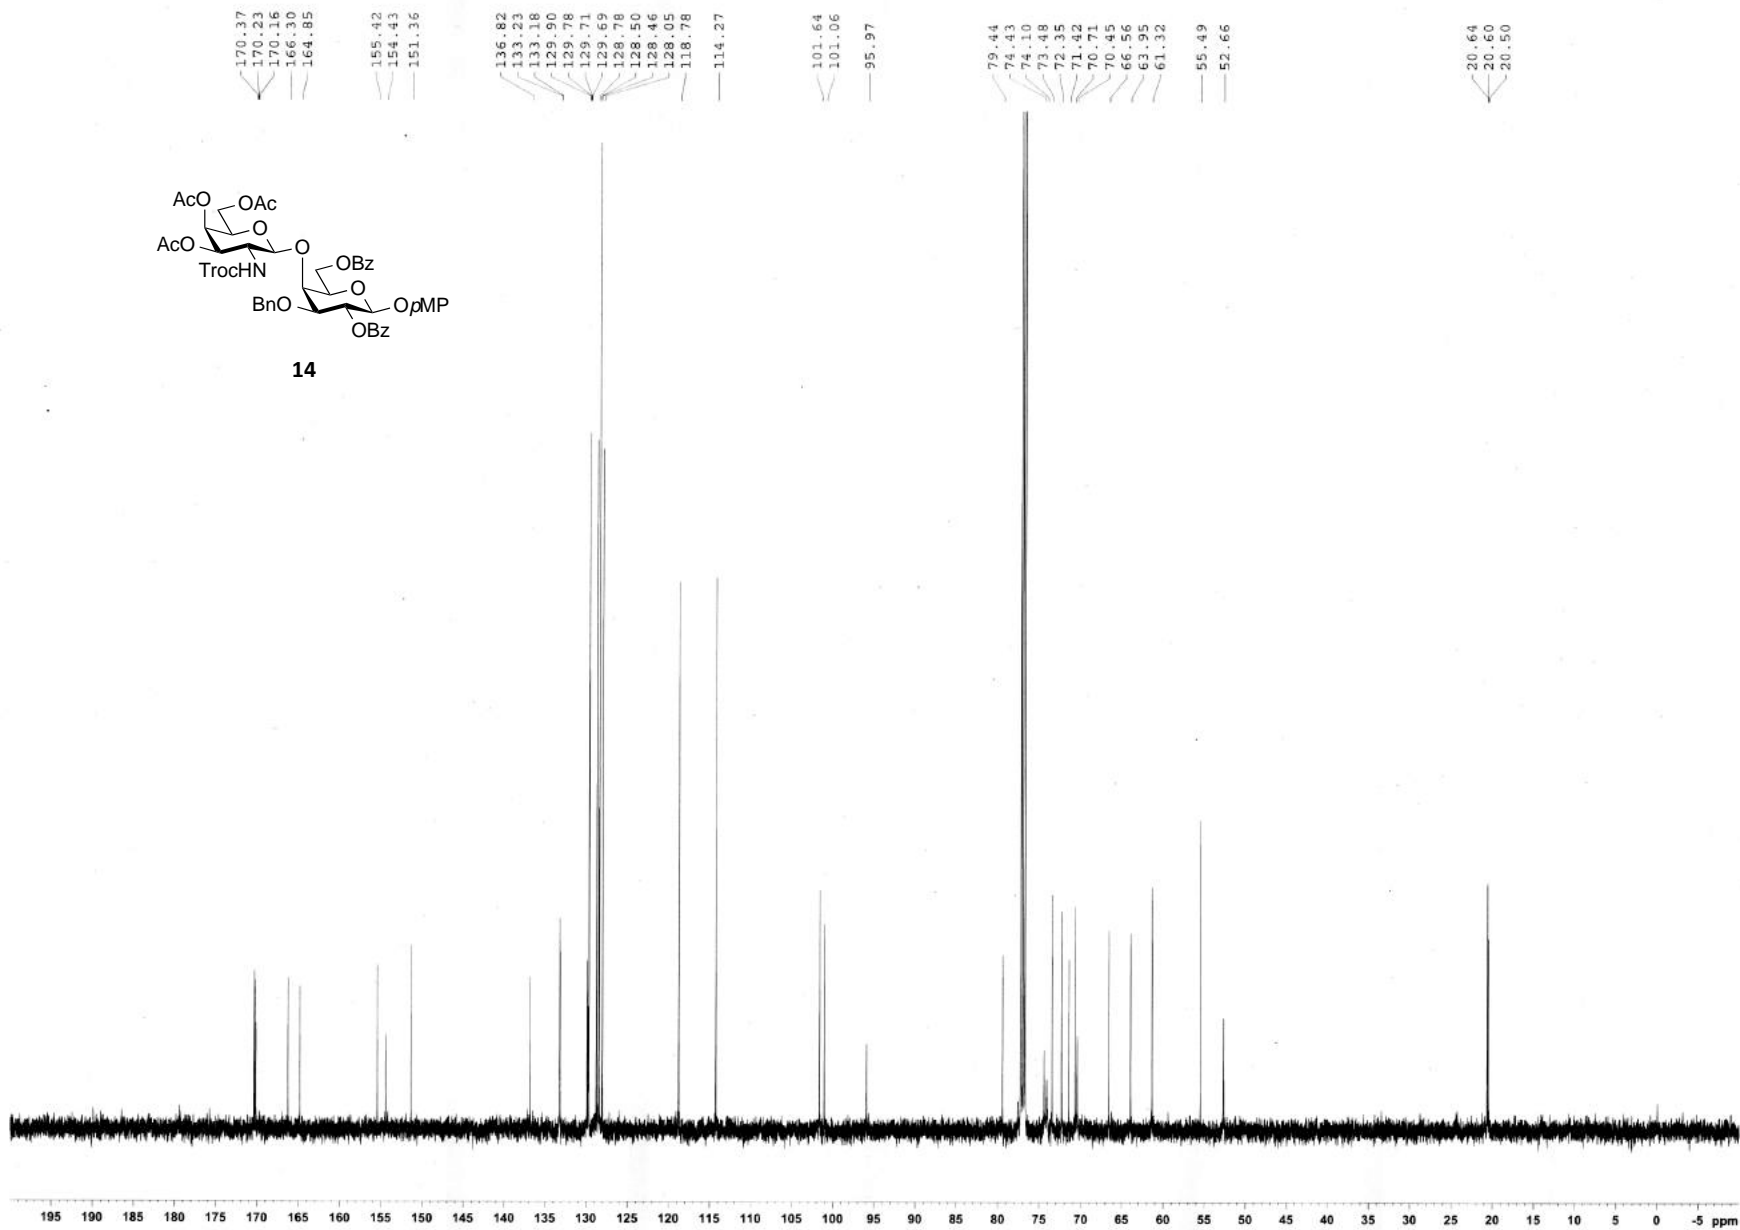

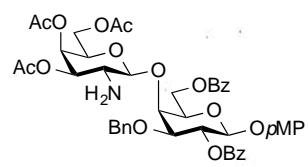

15

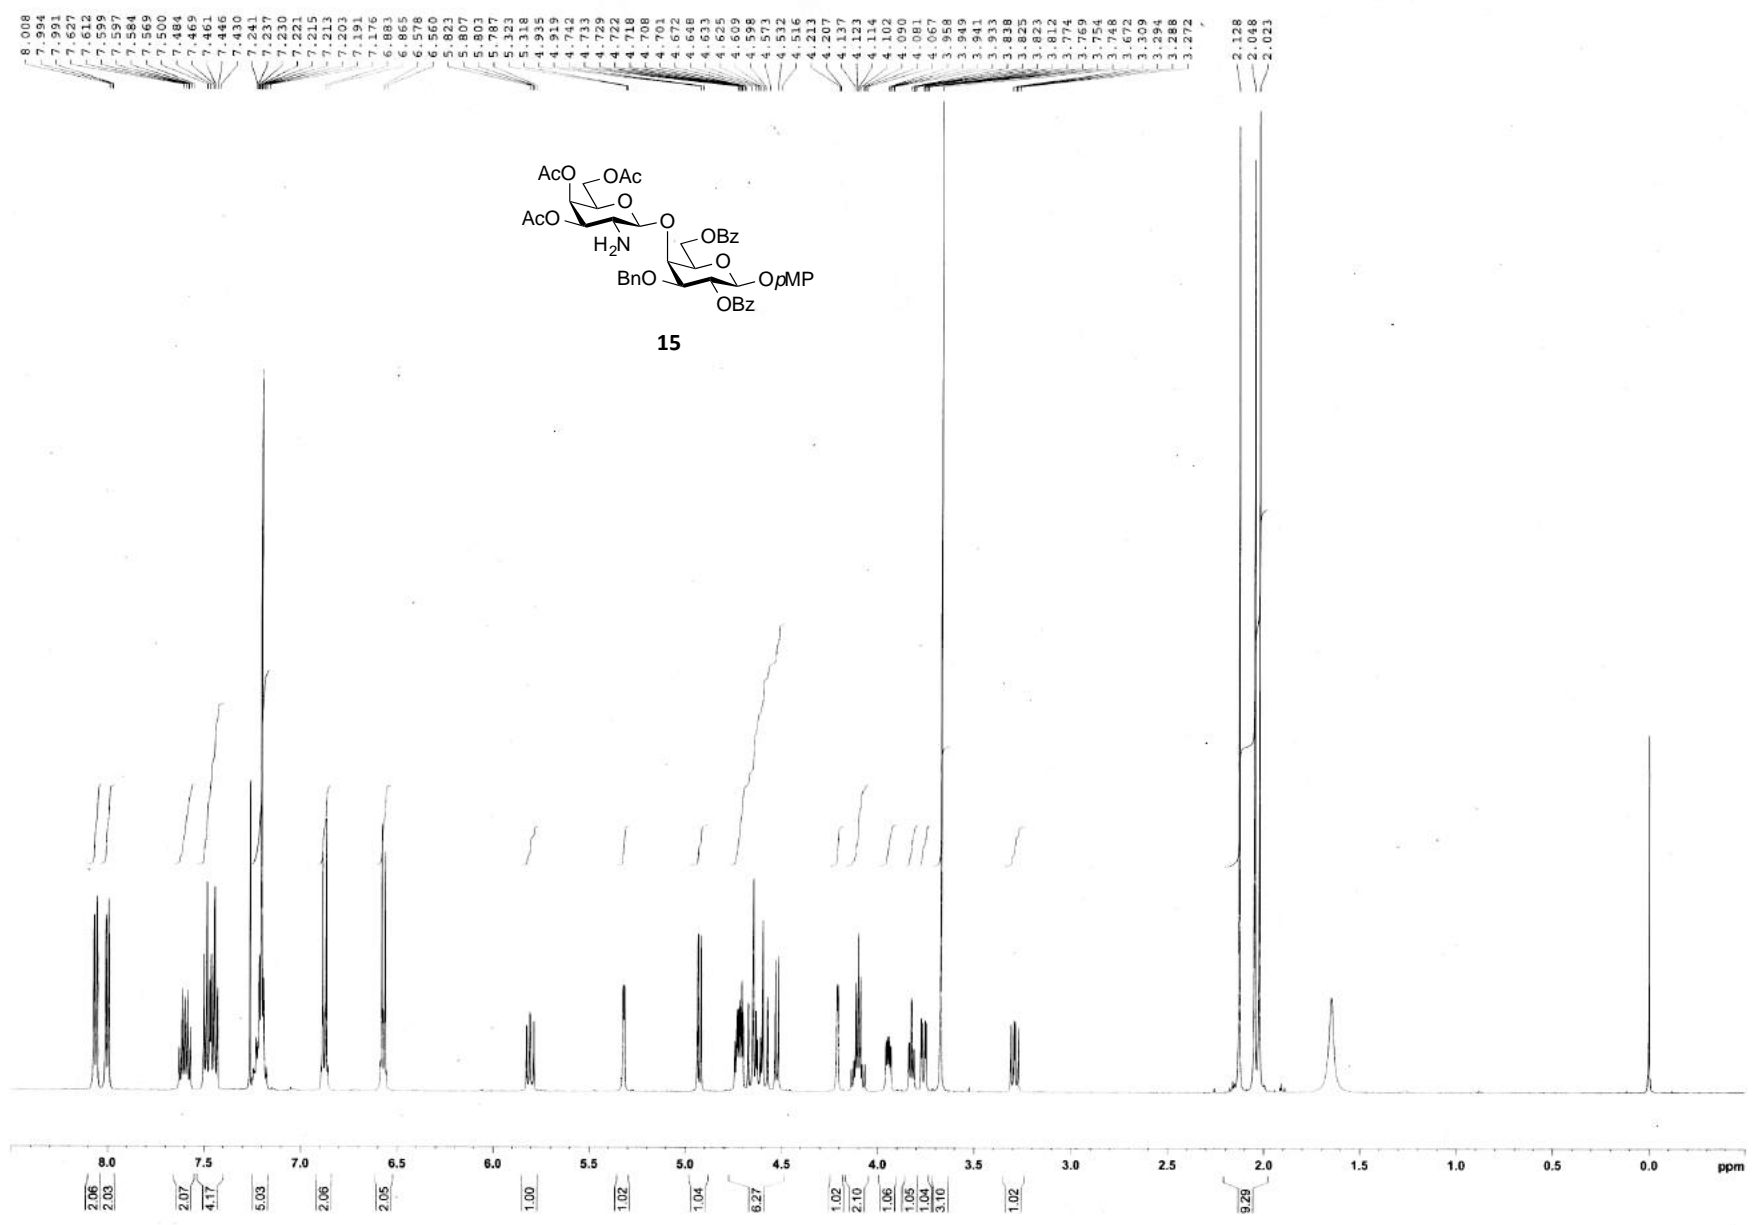

170.45  
170.41  
170.33  
166.59  
165.18

155.38  
151.36

136.99  
133.25  
133.15  
129.90  
129.78  
129.68  
128.54  
128.48  
128.39  
128.15  
127.95  
118.63  
114.25

105.25  
100.92

78.72  
74.18  
73.92  
72.55  
72.50  
71.18  
70.69  
66.26  
64.13  
61.68

55.50  
51.76

20.75  
20.67  
20.65

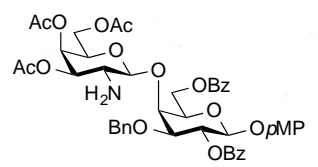

15

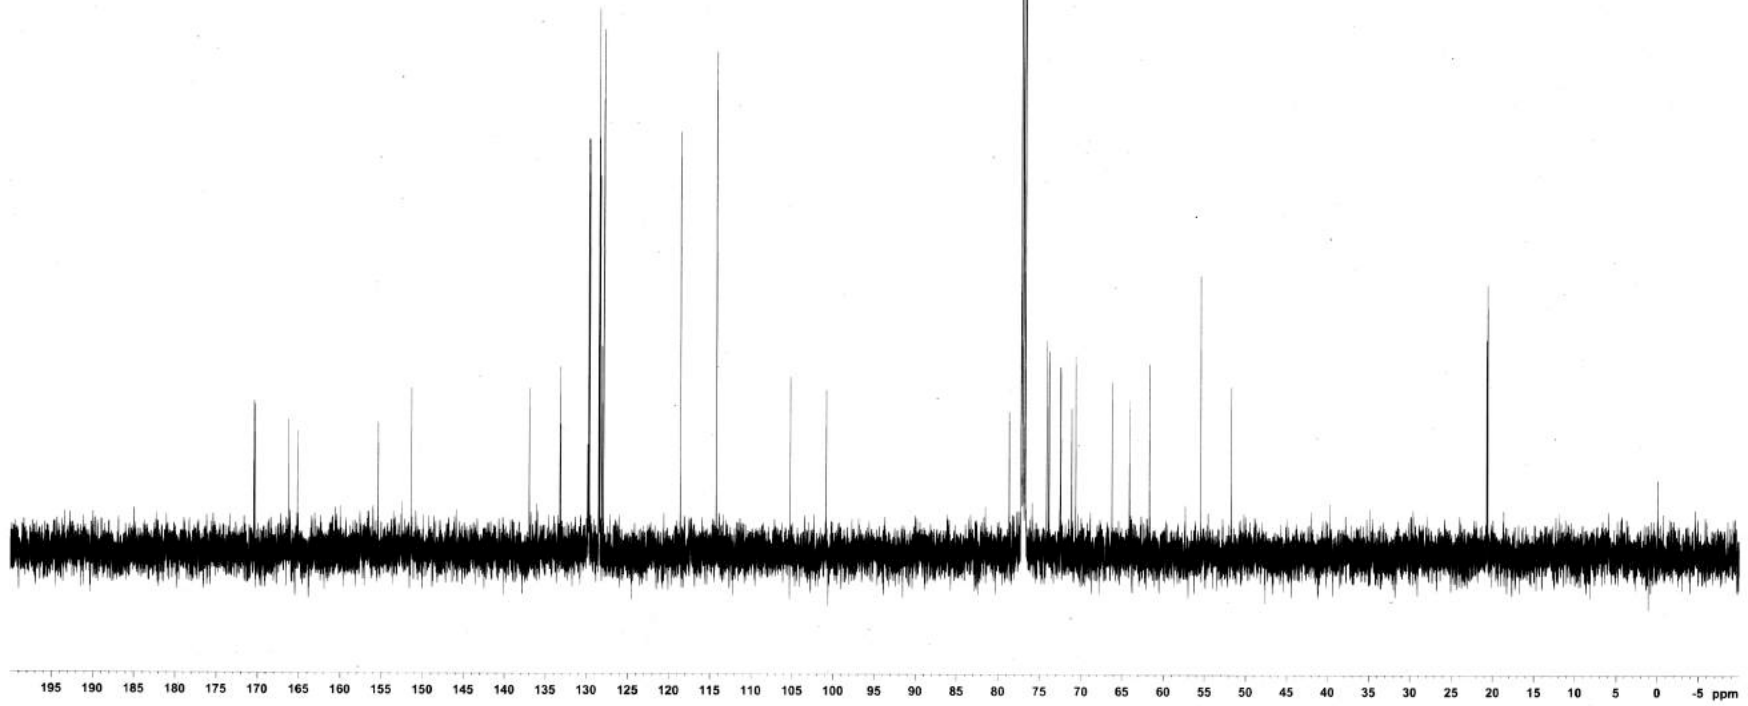

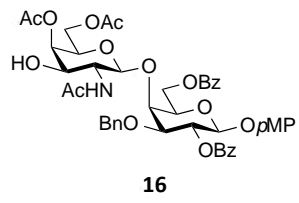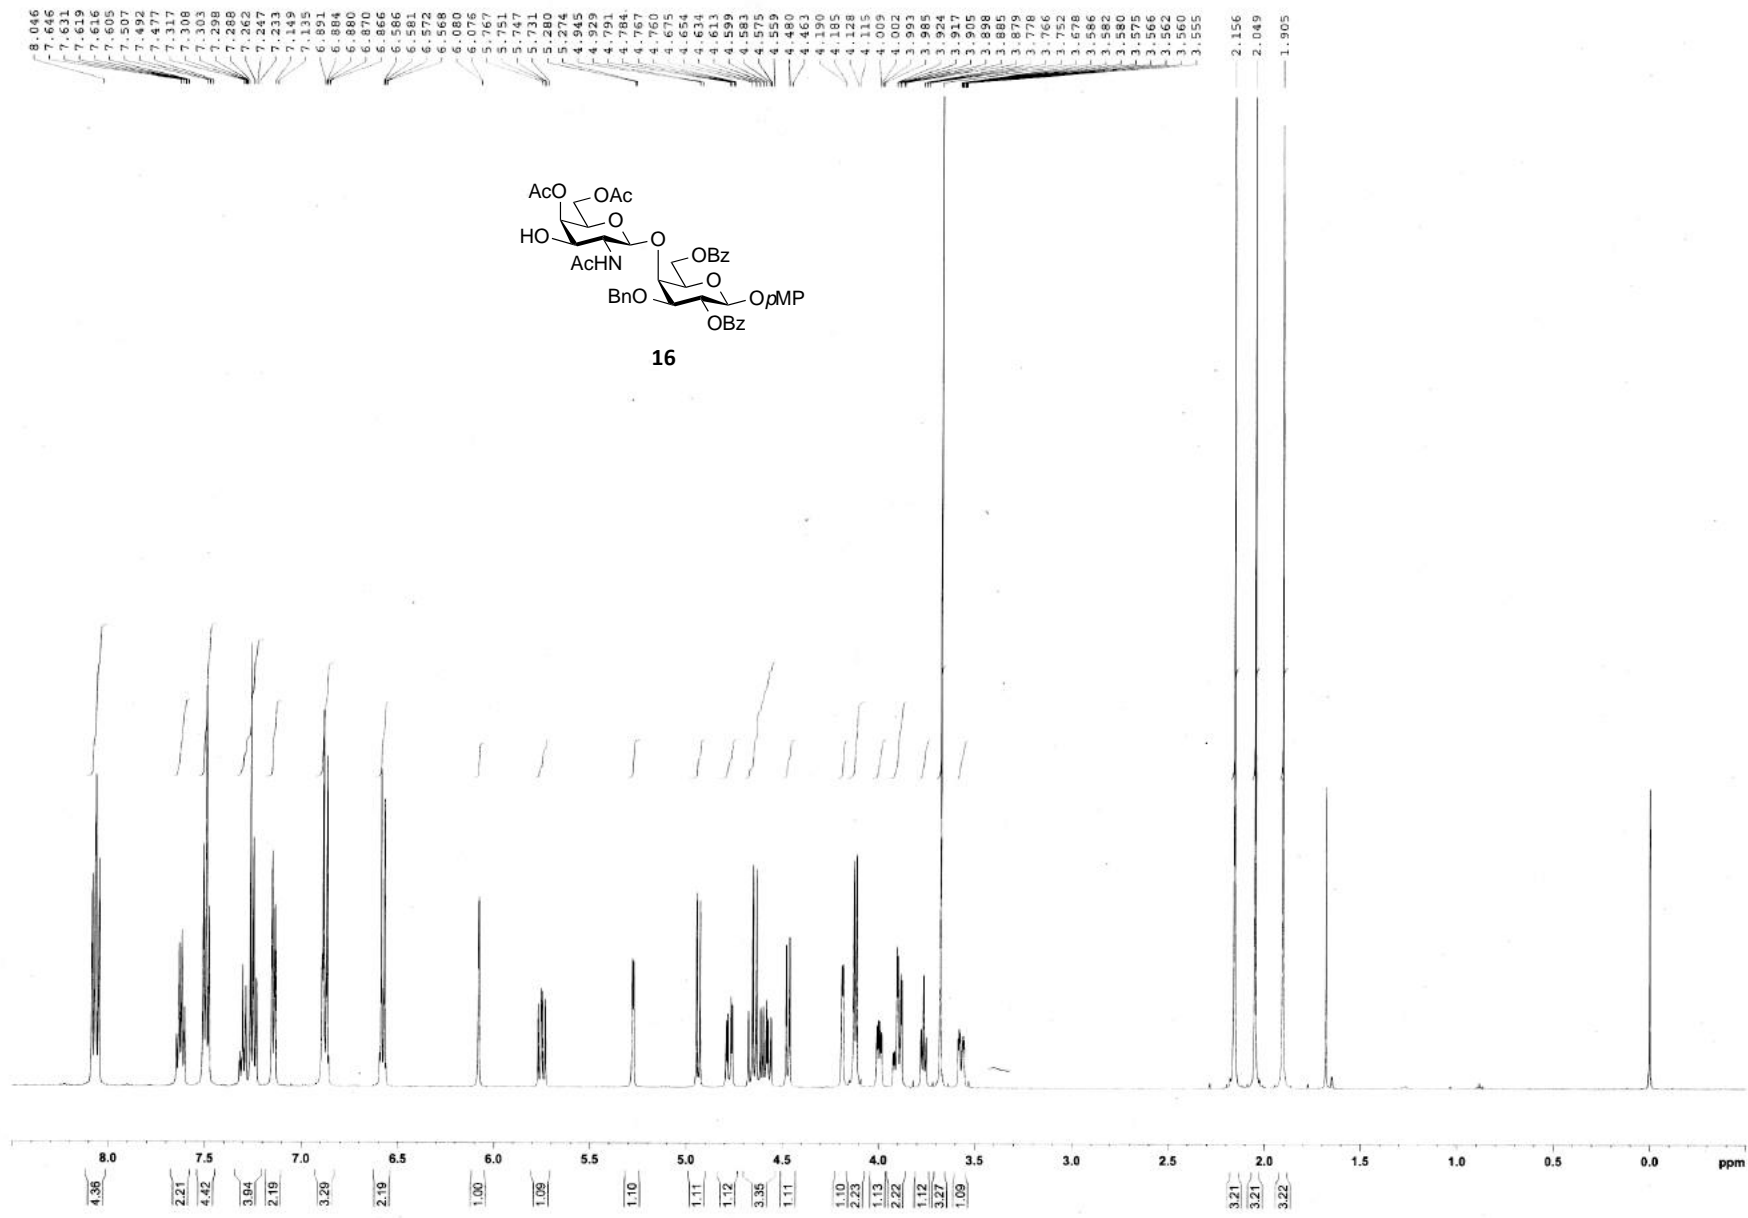



175.17  
170.61  
170.41  
166.36  
165.08

155.51  
151.16

135.76  
133.45  
133.31  
129.80  
129.71  
129.54  
129.07  
128.90  
128.59  
128.58  
128.49  
118.80  
114.27

102.46  
100.65

80.04  
75.80  
74.52  
74.04  
72.25  
71.39  
71.34  
68.01  
64.01  
62.08

55.79  
55.49

22.56  
20.79  
20.66

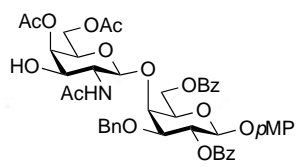

16

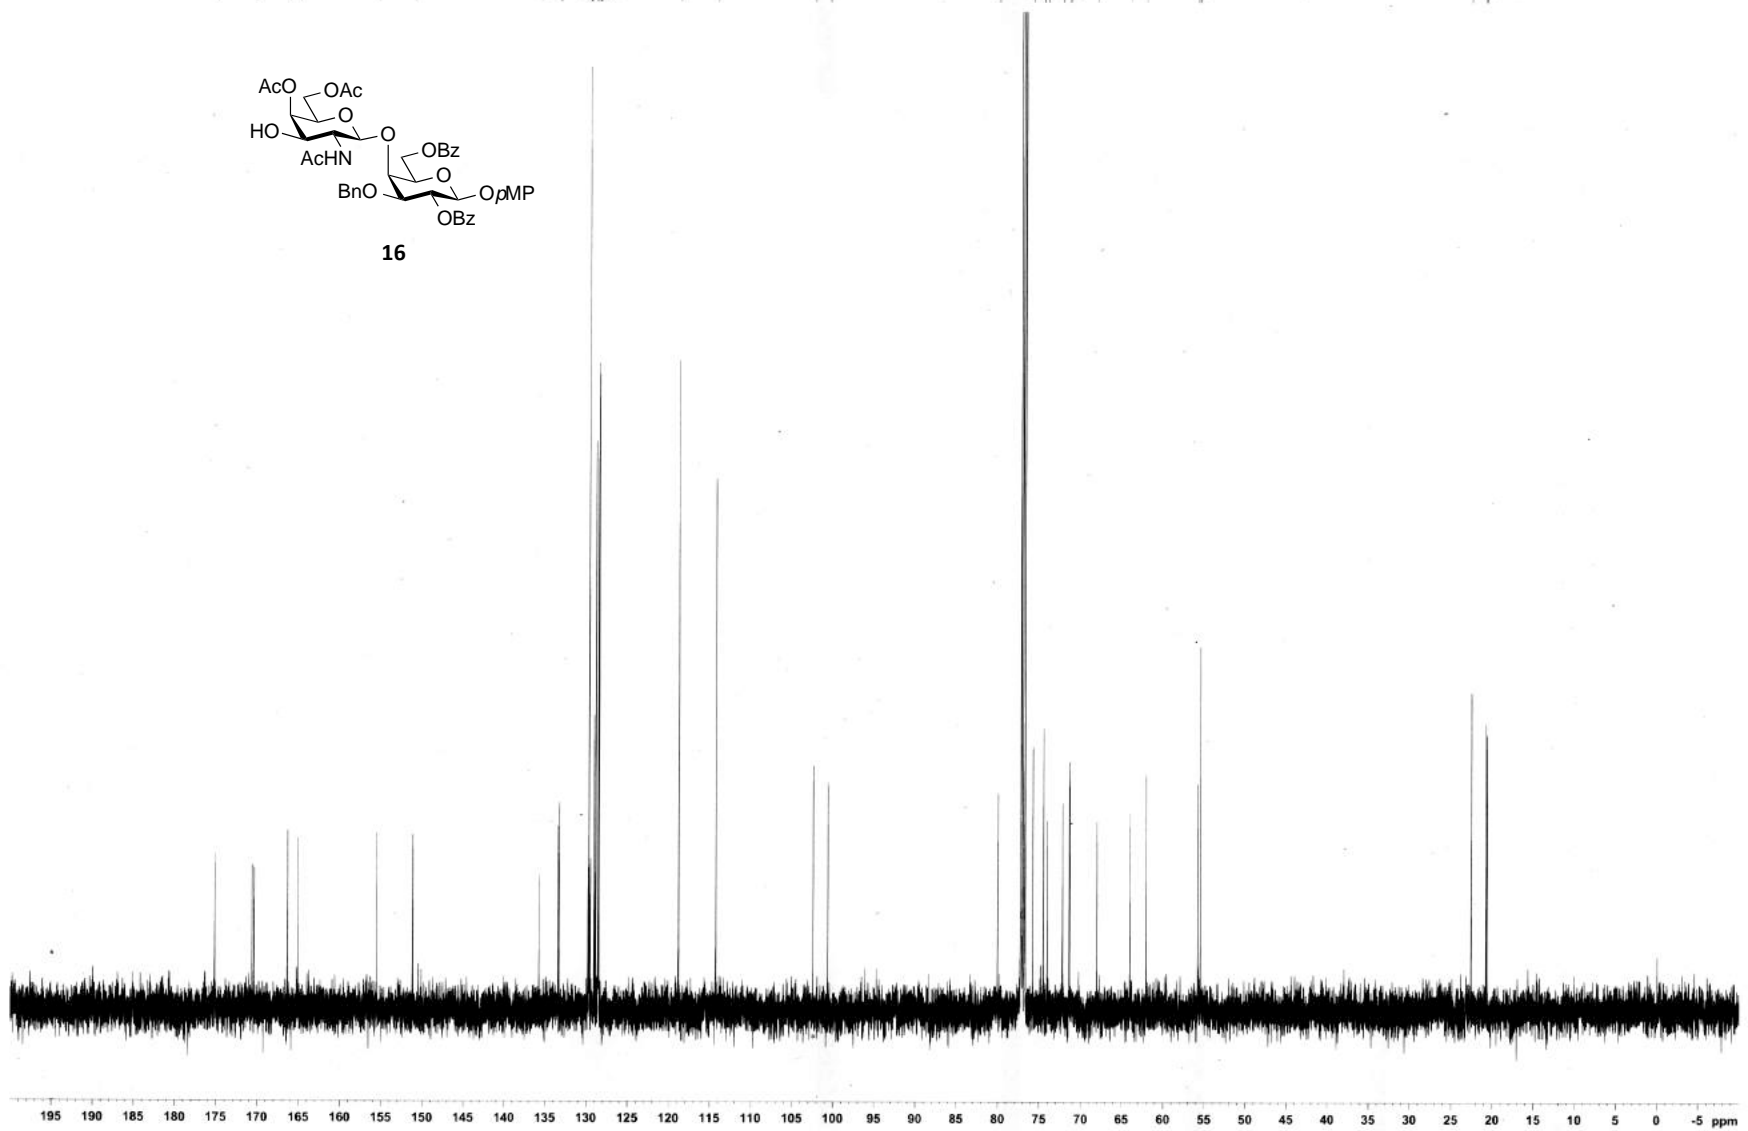

195 190 185 180 175 170 165 160 155 150 145 140 135 130 125 120 115 110 105 100 95 90 85 80 75 70 65 60 55 50 45 40 35 30 25 20 15 10 5 0 -5 ppm

8.060  
8.053  
8.037  
8.024  
8.022  
7.921  
7.907  
7.904  
7.633  
7.618  
7.604  
7.589  
7.574  
7.572  
7.556  
7.541  
7.537  
7.521  
7.505  
7.458  
7.443  
7.428  
7.423  
7.170  
7.155  
7.153  
7.142  
7.128  
7.104  
7.089  
7.074  
6.910  
6.792  
6.518  
6.500  
6.622  
3.605  
3.597  
5.597  
5.585  
5.521  
5.515  
5.459  
5.451  
5.444  
5.439  
5.423  
5.226  
5.212  
5.205  
5.196  
5.180  
5.073  
5.066  
5.041  
4.908  
4.796  
4.792  
4.781  
4.651  
4.643  
4.626  
4.619  
4.577  
4.552  
4.539  
4.529  
4.517  
4.502  
4.495  
4.478  
4.352  
4.328  
4.314  
4.291  
4.095  
4.082  
4.047  
4.035  
4.024  
3.998  
3.993  
3.960  
3.947  
3.937  
3.924  
3.856  
3.849  
3.832  
3.832  
3.804  
3.792  
3.644  
3.579  
3.574  
3.559  
3.554  
2.594  
2.579  
2.576  
2.562  
2.549  
2.451  
2.438  
2.402  
2.397  
2.100  
2.100

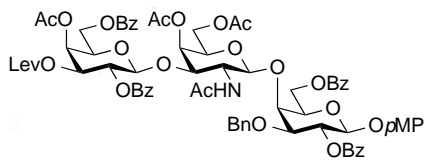

18

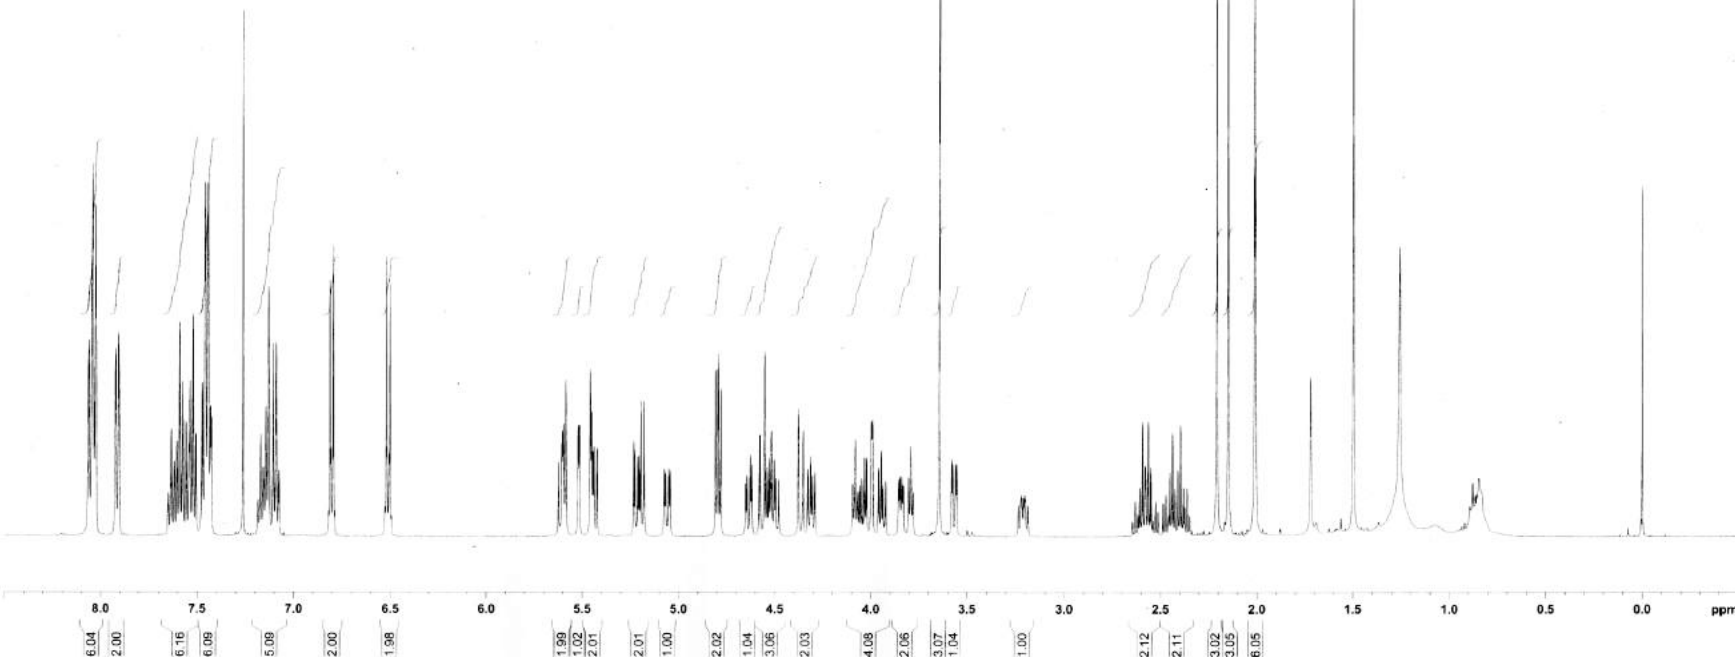

—205.67

172.63  
171.71  
170.47  
170.28  
169.91  
166.25  
165.84  
165.10  
164.97

—155.33

—151.30  
137.08  
133.55  
133.15  
129.95  
129.81  
129.76  
129.74  
129.70  
129.68  
129.54  
129.42  
128.70  
128.44  
128.40  
128.34  
128.30  
127.99  
118.62  
114.17

101.74  
100.80  
99.10

78.01  
74.37  
72.89  
72.43  
71.89  
70.97  
70.71  
69.37  
67.12  
64.18  
62.53  
61.50  
55.46

—37.70

29.66  
29.44  
27.80  
23.21  
20.80  
20.71  
20.67

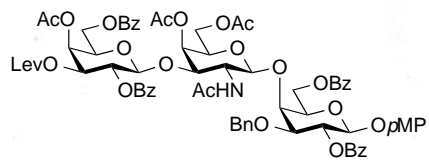

18

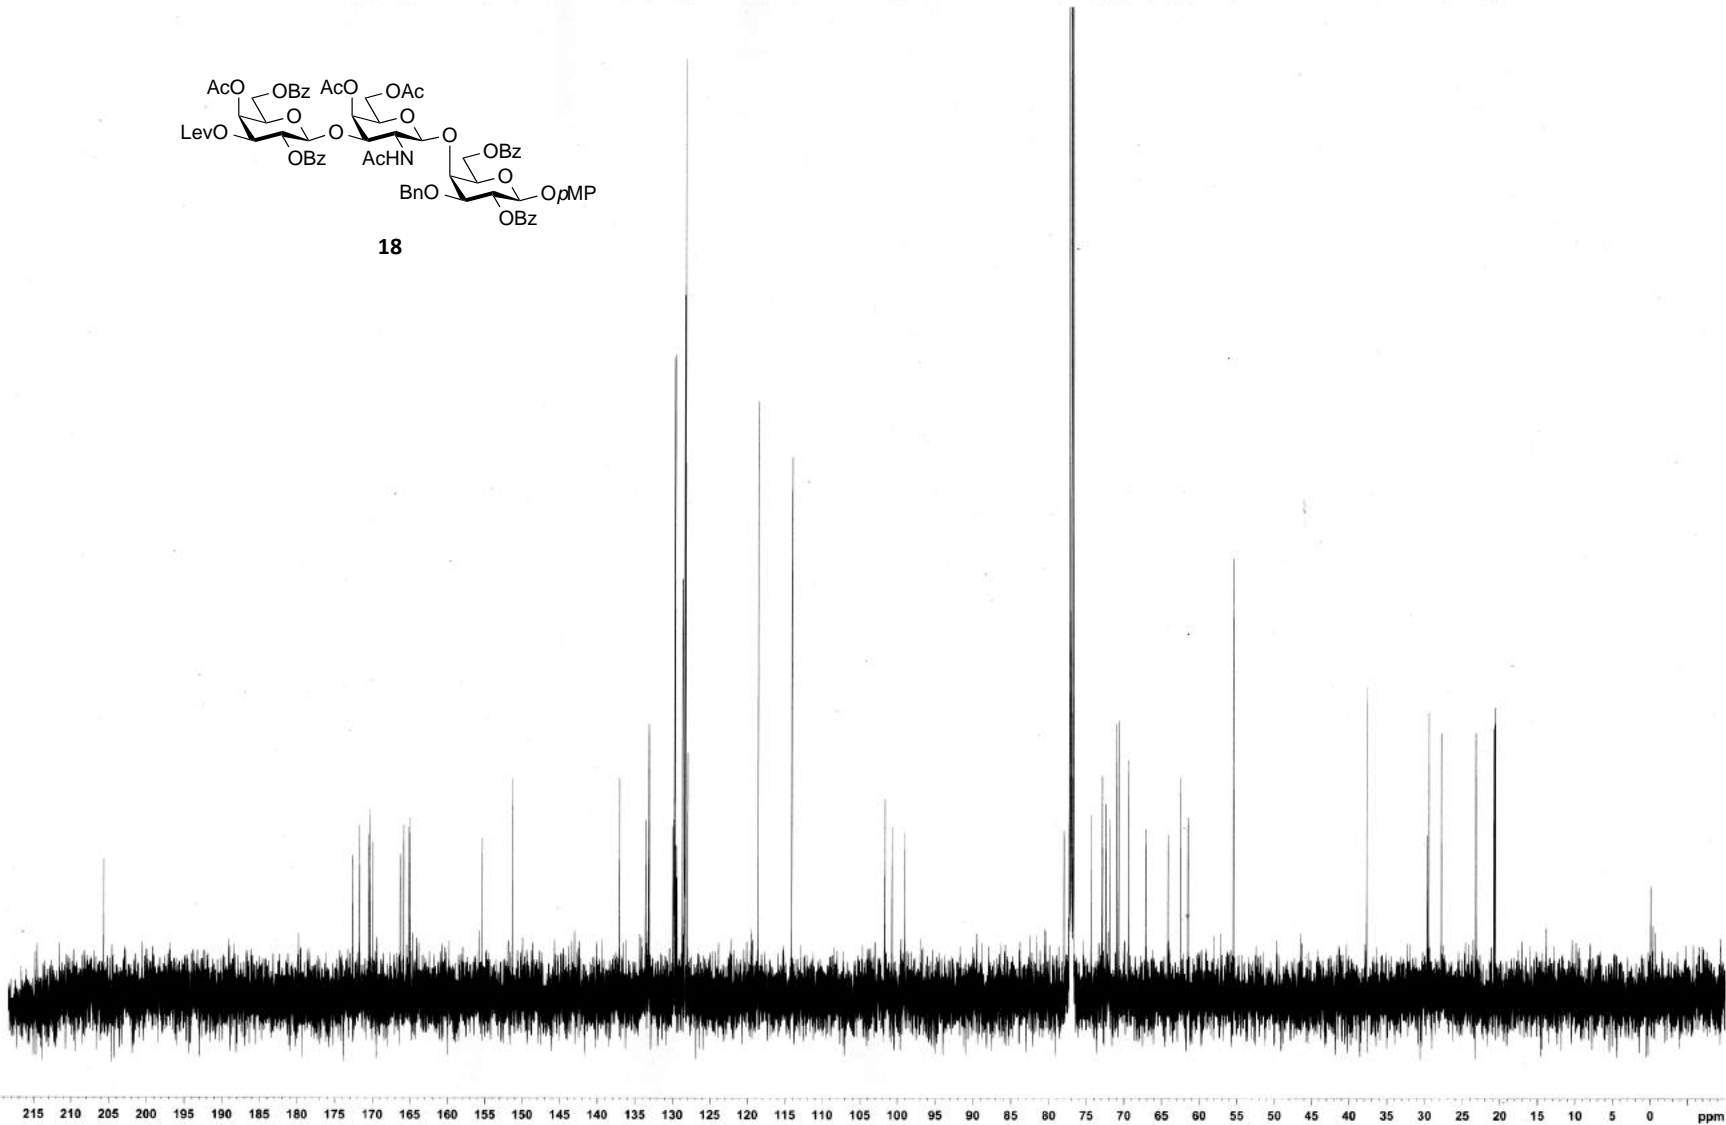

215 210 205 200 195 190 185 180 175 170 165 160 155 150 145 140 135 130 125 120 115 110 105 100 95 90 85 80 75 70 65 60 55 50 45 40 35 30 25 20 15 10 5 0 ppm

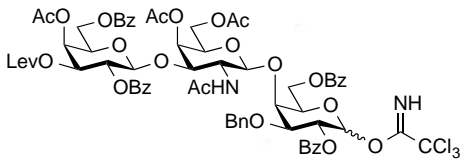

3

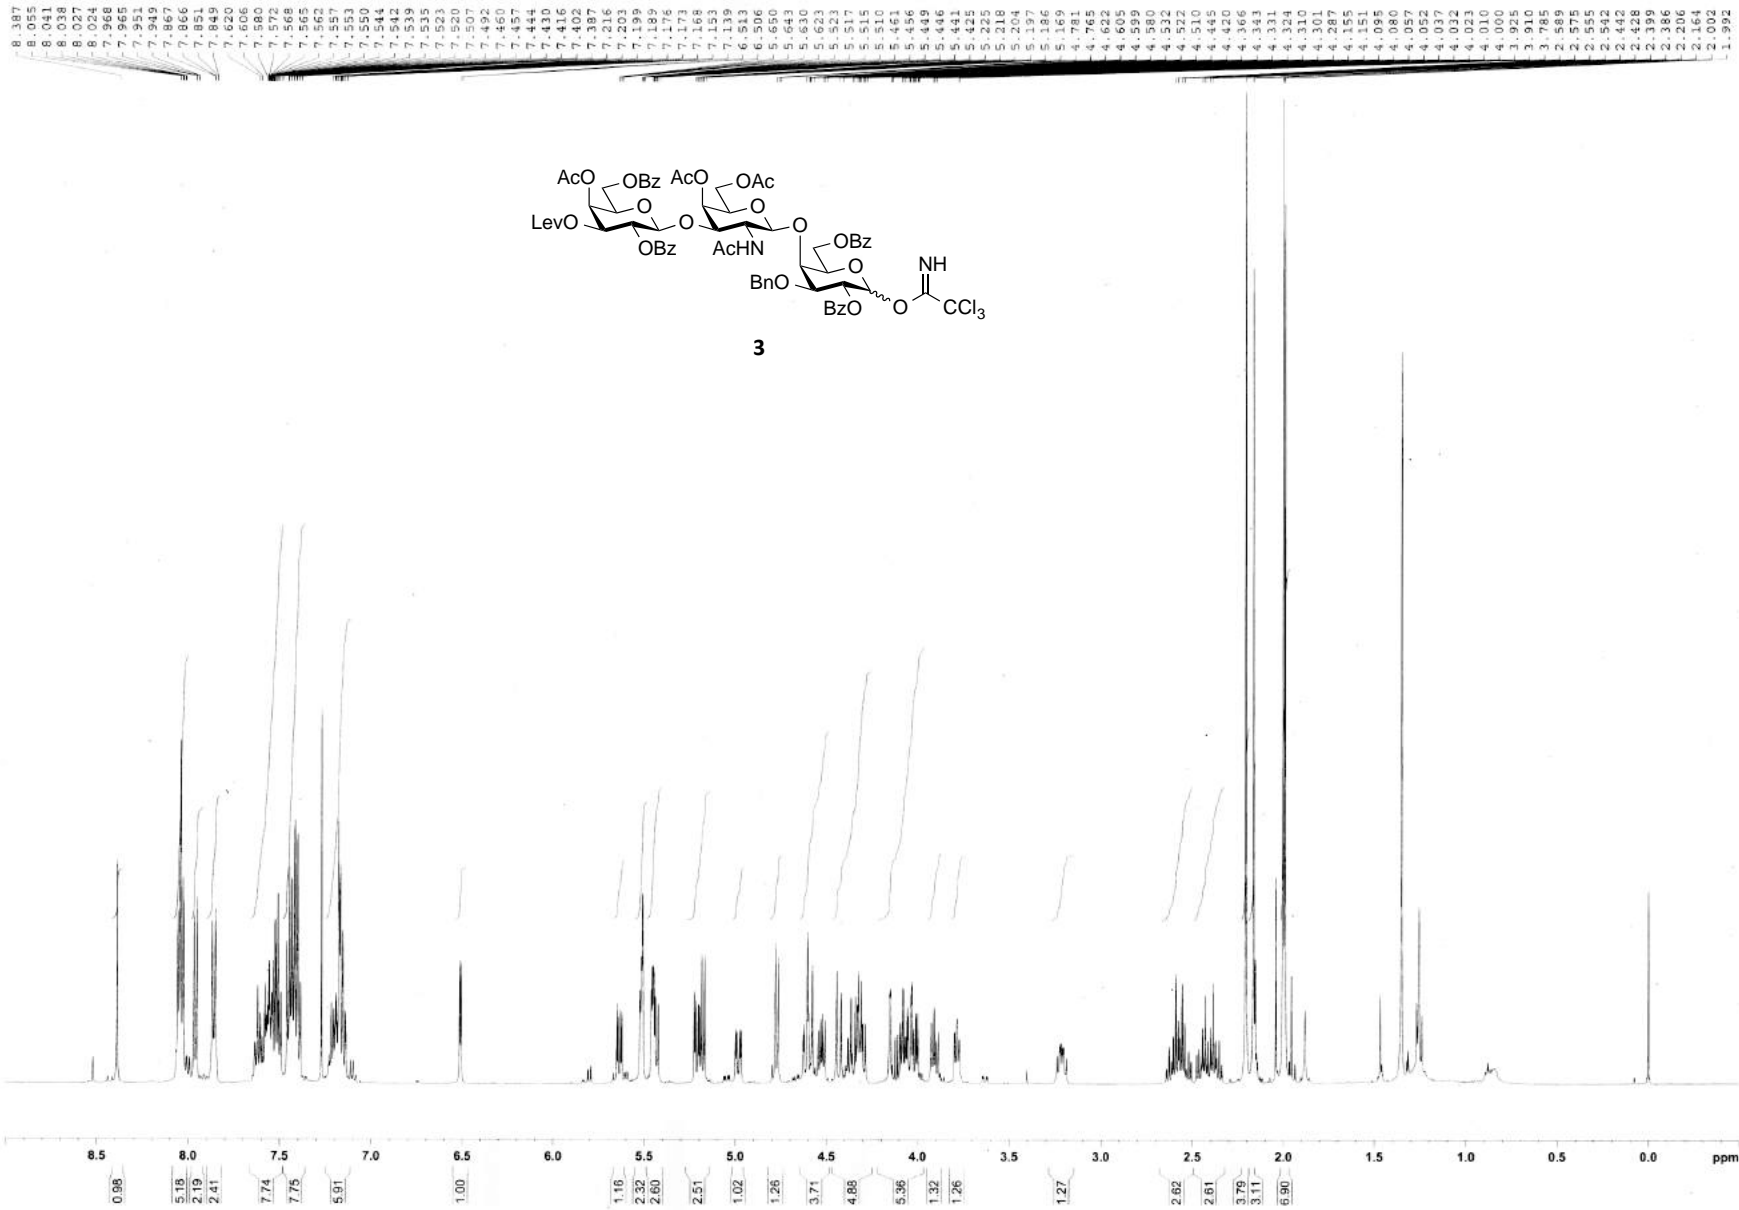

—205.65

172.08  
171.66  
170.43  
170.21  
169.89  
166.21  
165.79  
165.30  
164.91  
160.21

137.10  
133.47  
133.30  
133.14  
133.00  
129.81  
129.70  
129.63  
129.53  
129.47  
129.35  
129.20  
128.63  
128.41  
128.31  
128.26  
127.95

101.74  
99.23

94.11  
90.85

74.67  
74.05  
73.95  
71.90  
71.58  
71.00  
70.90  
70.66  
69.37  
69.24  
68.50  
67.04  
64.53  
62.59  
61.46  
60.32  
55.31

—37.63

29.40  
27.73  
22.98  
20.79  
20.67  
20.61

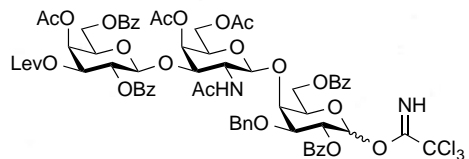

3

215 210 205 200 195 190 185 180 175 170 165 160 155 150 145 140 135 130 125 120 115 110 105 100 95 90 85 80 75 70 65 60 55 50 45 40 35 30 25 20 15 10 5 0 ppm

8.008  
 7.994  
 7.979  
 7.973  
 7.971  
 7.898  
 7.884  
 7.882  
 7.535  
 7.533  
 7.521  
 7.506  
 7.503  
 7.395  
 7.380  
 7.368  
 7.365  
 7.353  
 7.122  
 7.103  
 6.998  
 6.804  
 6.787  
 6.629  
 6.612  
 6.173  
 6.155  
 5.593  
 5.586  
 5.578  
 5.571  
 5.382  
 5.375  
 5.369  
 5.362  
 5.148  
 5.109  
 5.103  
 3.588  
 3.582  
 4.582  
 4.537  
 4.527  
 4.518  
 4.495  
 4.481  
 4.466  
 4.303  
 4.280  
 4.175  
 4.151  
 4.045  
 4.037  
 4.024  
 4.017  
 4.017  
 3.726  
 3.681  
 3.661  
 3.645  
 3.632  
 3.625  
 3.590  
 3.583  
 3.574  
 3.567  
 3.419  
 3.406  
 3.392  
 3.333  
 3.320  
 3.311  
 3.299  
 3.289  
 1.881  
 1.868  
 1.858  
 1.851  
 1.839  
 1.833  
 1.821  
 1.806  
 1.767  
 1.754  
 1.748  
 1.736  
 1.603  
 1.592  
 1.585  
 1.576  
 1.563  
 1.440  
 1.427  
 1.405  
 1.390  
 1.379  
 1.359  
 1.347  
 1.236  
 1.236  
 1.179  
 1.130  
 1.116  
 1.101  
 1.086  
 0.892  
 0.885  
 0.879  
 0.871  
 0.865  
 0.806  
 0.000  
 -0.055  
 -0.053

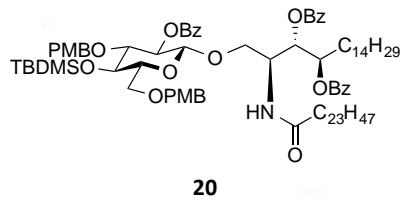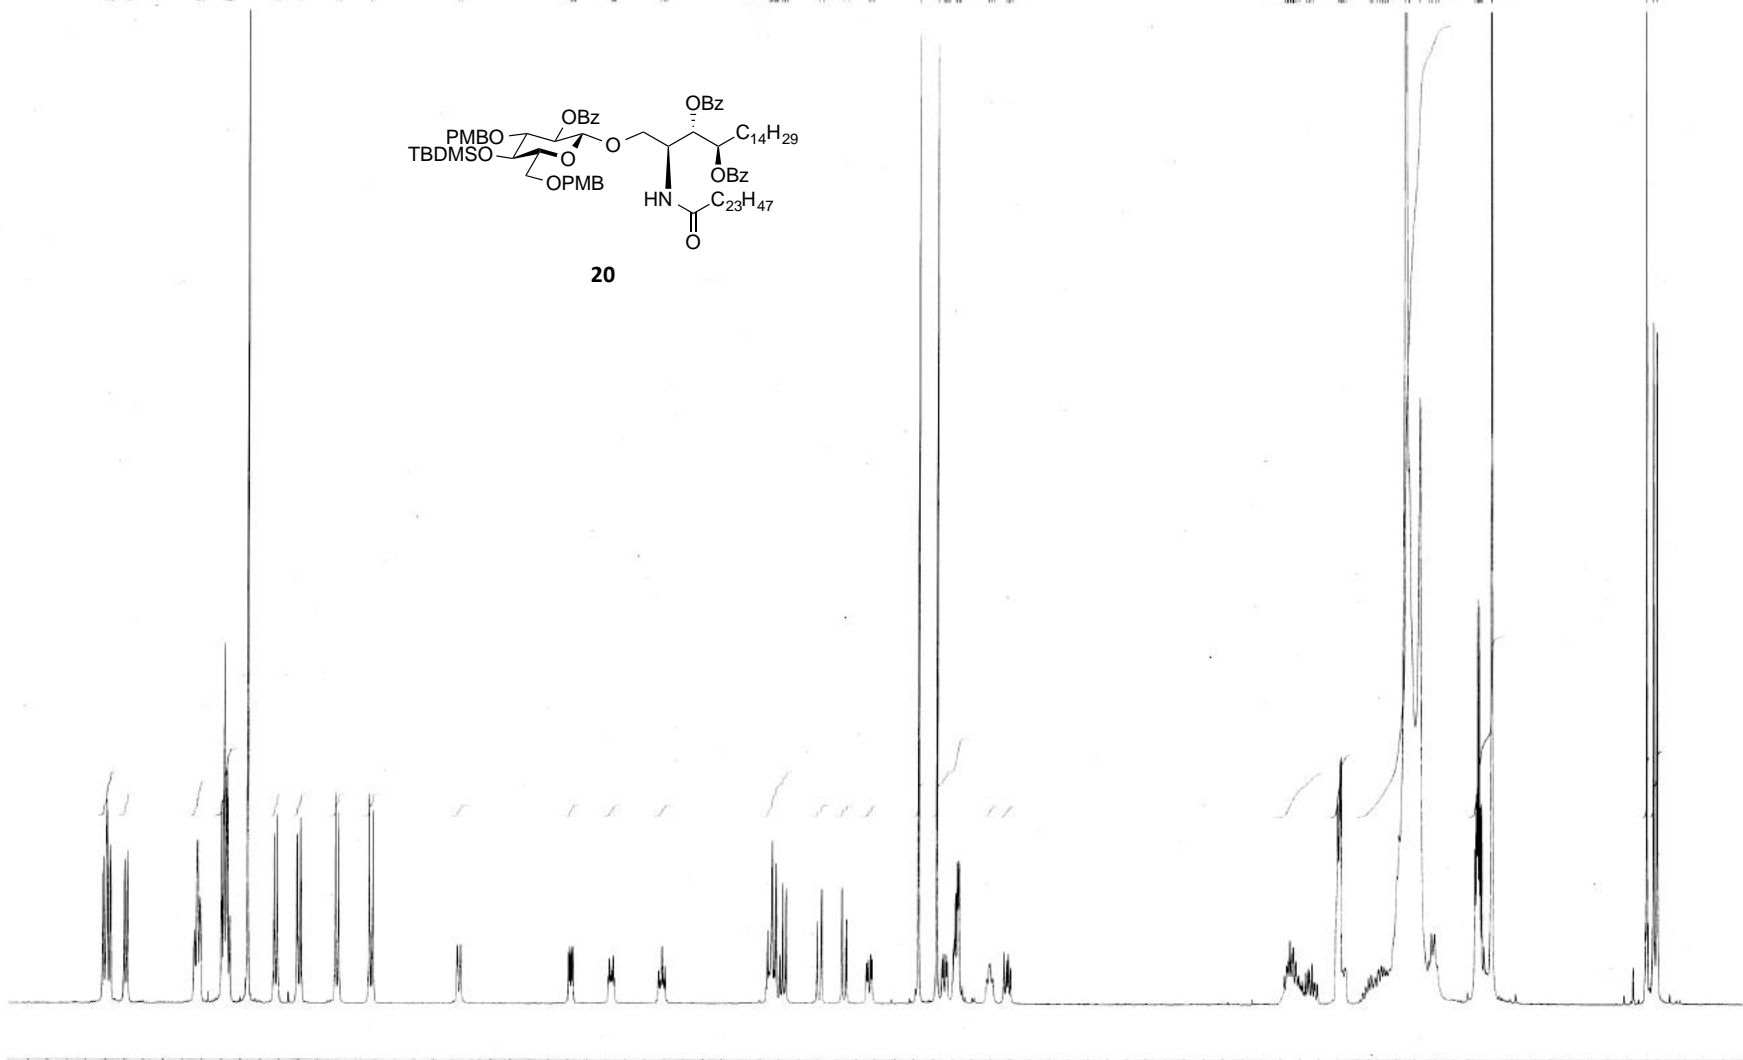

4.00  
 1.98  
 3.05  
 6.09  
 1.96  
 1.99  
 2.01  
 1.99  
 0.99  
 1.00  
 1.02  
 1.00  
 1.00  
 4.06  
 1.03  
 1.02  
 1.00  
 3.01  
 7.17  
 1.04  
 0.99  
 3.96  
 5.72  
 72.38  
 16.60  
 5.44  
 5.99

ppm

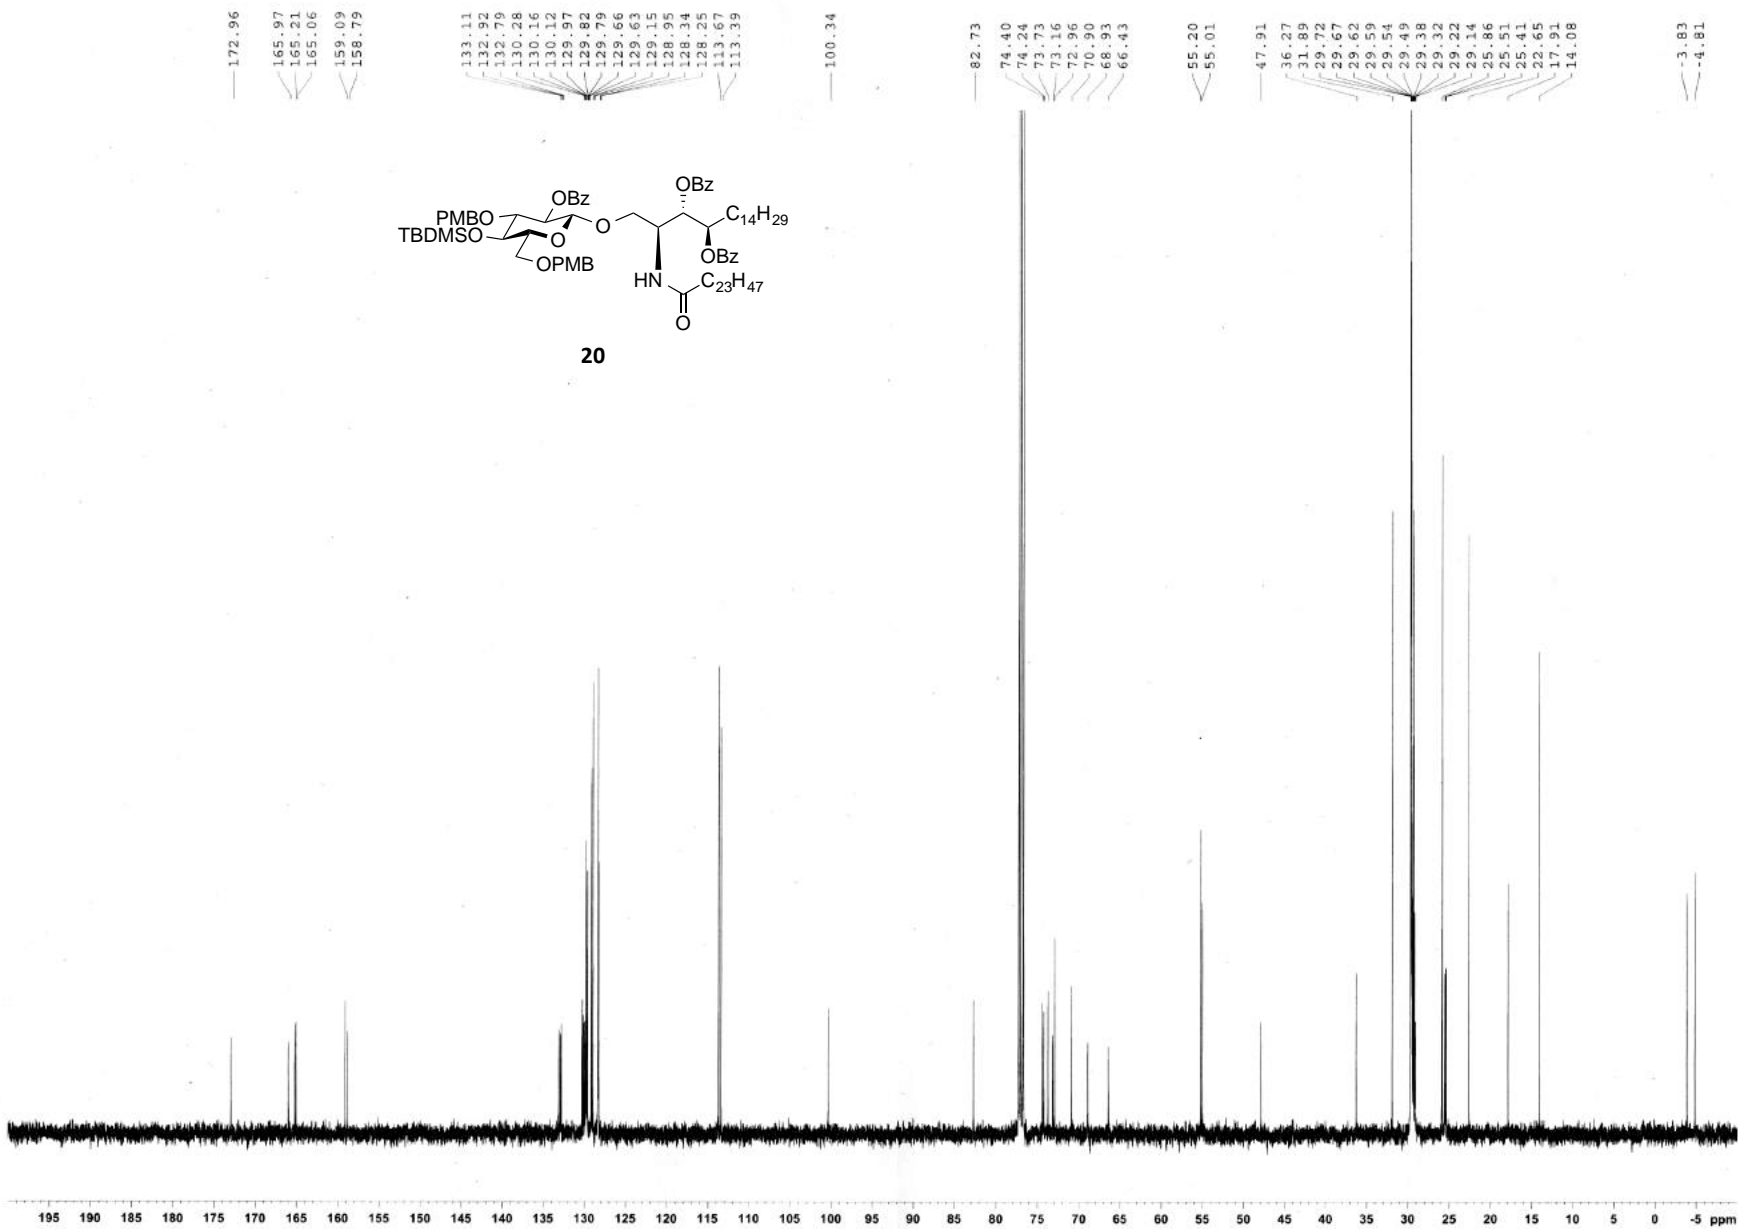

8.000  
7.982  
7.966  
7.954  
7.948  
7.933  
7.914  
7.898  
7.882  
7.872  
7.862  
7.854  
7.844  
7.832  
7.822  
7.812  
7.802  
7.792  
7.782  
7.772  
7.762  
7.752  
7.746  
7.744  
7.742  
7.740  
7.738  
7.736  
7.734  
7.732  
7.730  
7.728  
7.726  
7.724  
7.722  
7.720  
7.718  
7.716  
7.714  
7.712  
7.710  
7.708  
7.706  
7.704  
7.702  
7.700  
7.698  
7.696  
7.694  
7.692  
7.690  
7.688  
7.686  
7.684  
7.682  
7.680  
7.678  
7.676  
7.674  
7.672  
7.670  
7.668  
7.666  
7.664  
7.662  
7.660  
7.658  
7.656  
7.654  
7.652  
7.650  
7.648  
7.646  
7.644  
7.642  
7.640  
7.638  
7.636  
7.634  
7.632  
7.630  
7.628  
7.626  
7.624  
7.622  
7.620  
7.618  
7.616  
7.614  
7.612  
7.610  
7.608  
7.606  
7.604  
7.602  
7.600  
7.598  
7.596  
7.594  
7.592  
7.590  
7.588  
7.586  
7.584  
7.582  
7.580  
7.578  
7.576  
7.574  
7.572  
7.570  
7.568  
7.566  
7.564  
7.562  
7.560  
7.558  
7.556  
7.554  
7.552  
7.550  
7.548  
7.546  
7.544  
7.542  
7.540  
7.538  
7.536  
7.534  
7.532  
7.530  
7.528  
7.526  
7.524  
7.522  
7.520  
7.518  
7.516  
7.514  
7.512  
7.510  
7.508  
7.506  
7.504  
7.502  
7.500  
7.498  
7.496  
7.494  
7.492  
7.490  
7.488  
7.486  
7.484  
7.482  
7.480  
7.478  
7.476  
7.474  
7.472  
7.470  
7.468  
7.466  
7.464  
7.462  
7.460  
7.458  
7.456  
7.454  
7.452  
7.450  
7.448  
7.446  
7.444  
7.442  
7.440  
7.438  
7.436  
7.434  
7.432  
7.430  
7.428  
7.426  
7.424  
7.422  
7.420  
7.418  
7.416  
7.414  
7.412  
7.410  
7.408  
7.406  
7.404  
7.402  
7.400  
7.398  
7.396  
7.394  
7.392  
7.390  
7.388  
7.386  
7.384  
7.382  
7.380  
7.378  
7.376  
7.374  
7.372  
7.370  
7.368  
7.366  
7.364  
7.362  
7.360  
7.358  
7.356  
7.354  
7.352  
7.350  
7.348  
7.346  
7.344  
7.342  
7.340  
7.338  
7.336  
7.334  
7.332  
7.330  
7.328  
7.326  
7.324  
7.322  
7.320  
7.318  
7.316  
7.314  
7.312  
7.310  
7.308  
7.306  
7.304  
7.302  
7.300  
7.298  
7.296  
7.294  
7.292  
7.290  
7.288  
7.286  
7.284  
7.282  
7.280  
7.278  
7.276  
7.274  
7.272  
7.270  
7.268  
7.266  
7.264  
7.262  
7.260  
7.258  
7.256  
7.254  
7.252  
7.250  
7.248  
7.246  
7.244  
7.242  
7.240  
7.238  
7.236  
7.234  
7.232  
7.230  
7.228  
7.226  
7.224  
7.222  
7.220  
7.218  
7.216  
7.214  
7.212  
7.210  
7.208  
7.206  
7.204  
7.202  
7.200  
7.198  
7.196  
7.194  
7.192  
7.190  
7.188  
7.186  
7.184  
7.182  
7.180  
7.178  
7.176  
7.174  
7.172  
7.170  
7.168  
7.166  
7.164  
7.162  
7.160  
7.158  
7.156  
7.154  
7.152  
7.150  
7.148  
7.146  
7.144  
7.142  
7.140  
7.138  
7.136  
7.134  
7.132  
7.130  
7.128  
7.126  
7.124  
7.122  
7.120  
7.118  
7.116  
7.114  
7.112  
7.110  
7.108  
7.106  
7.104  
7.102  
7.100  
7.098  
7.096  
7.094  
7.092  
7.090  
7.088  
7.086  
7.084  
7.082  
7.080  
7.078  
7.076  
7.074  
7.072  
7.070  
7.068  
7.066  
7.064  
7.062  
7.060  
7.058  
7.056  
7.054  
7.052  
7.050  
7.048  
7.046  
7.044  
7.042  
7.040  
7.038  
7.036  
7.034  
7.032  
7.030  
7.028  
7.026  
7.024  
7.022  
7.020  
7.018  
7.016  
7.014  
7.012  
7.010  
7.008  
7.006  
7.004  
7.002  
7.000

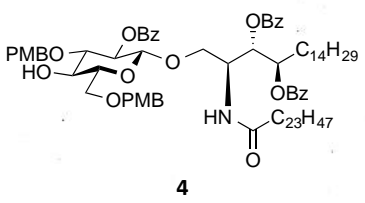

4

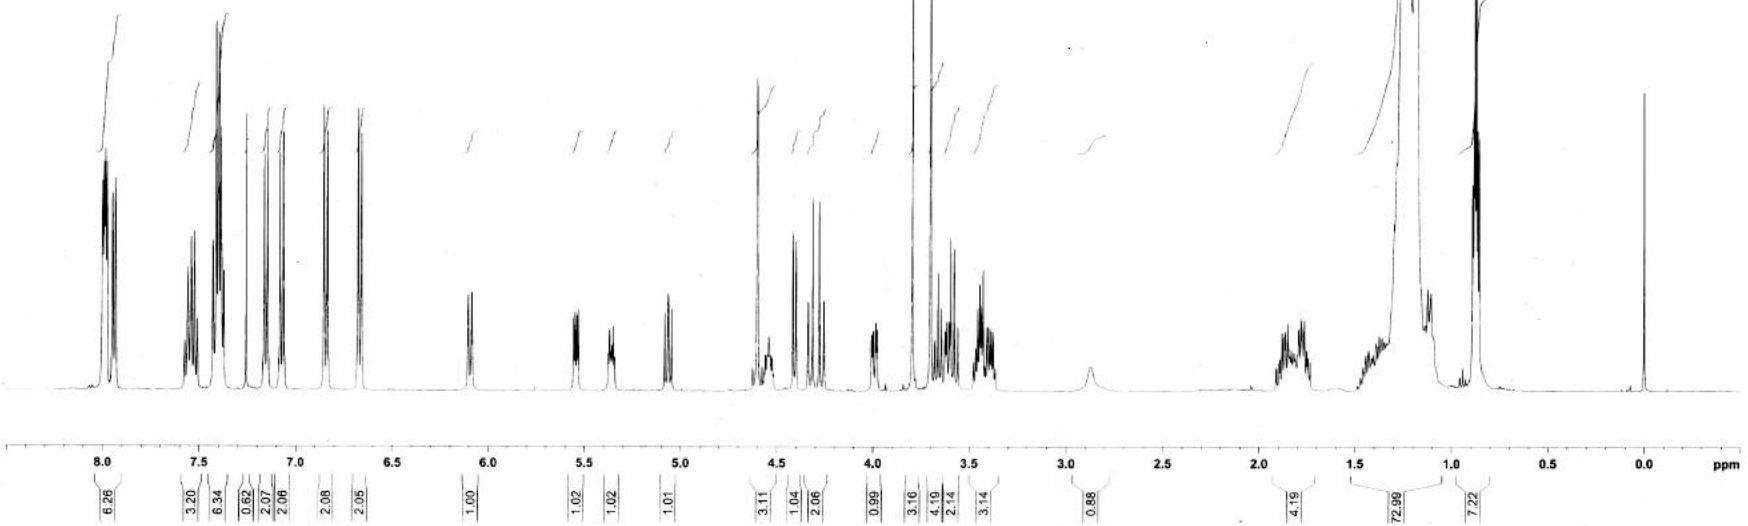



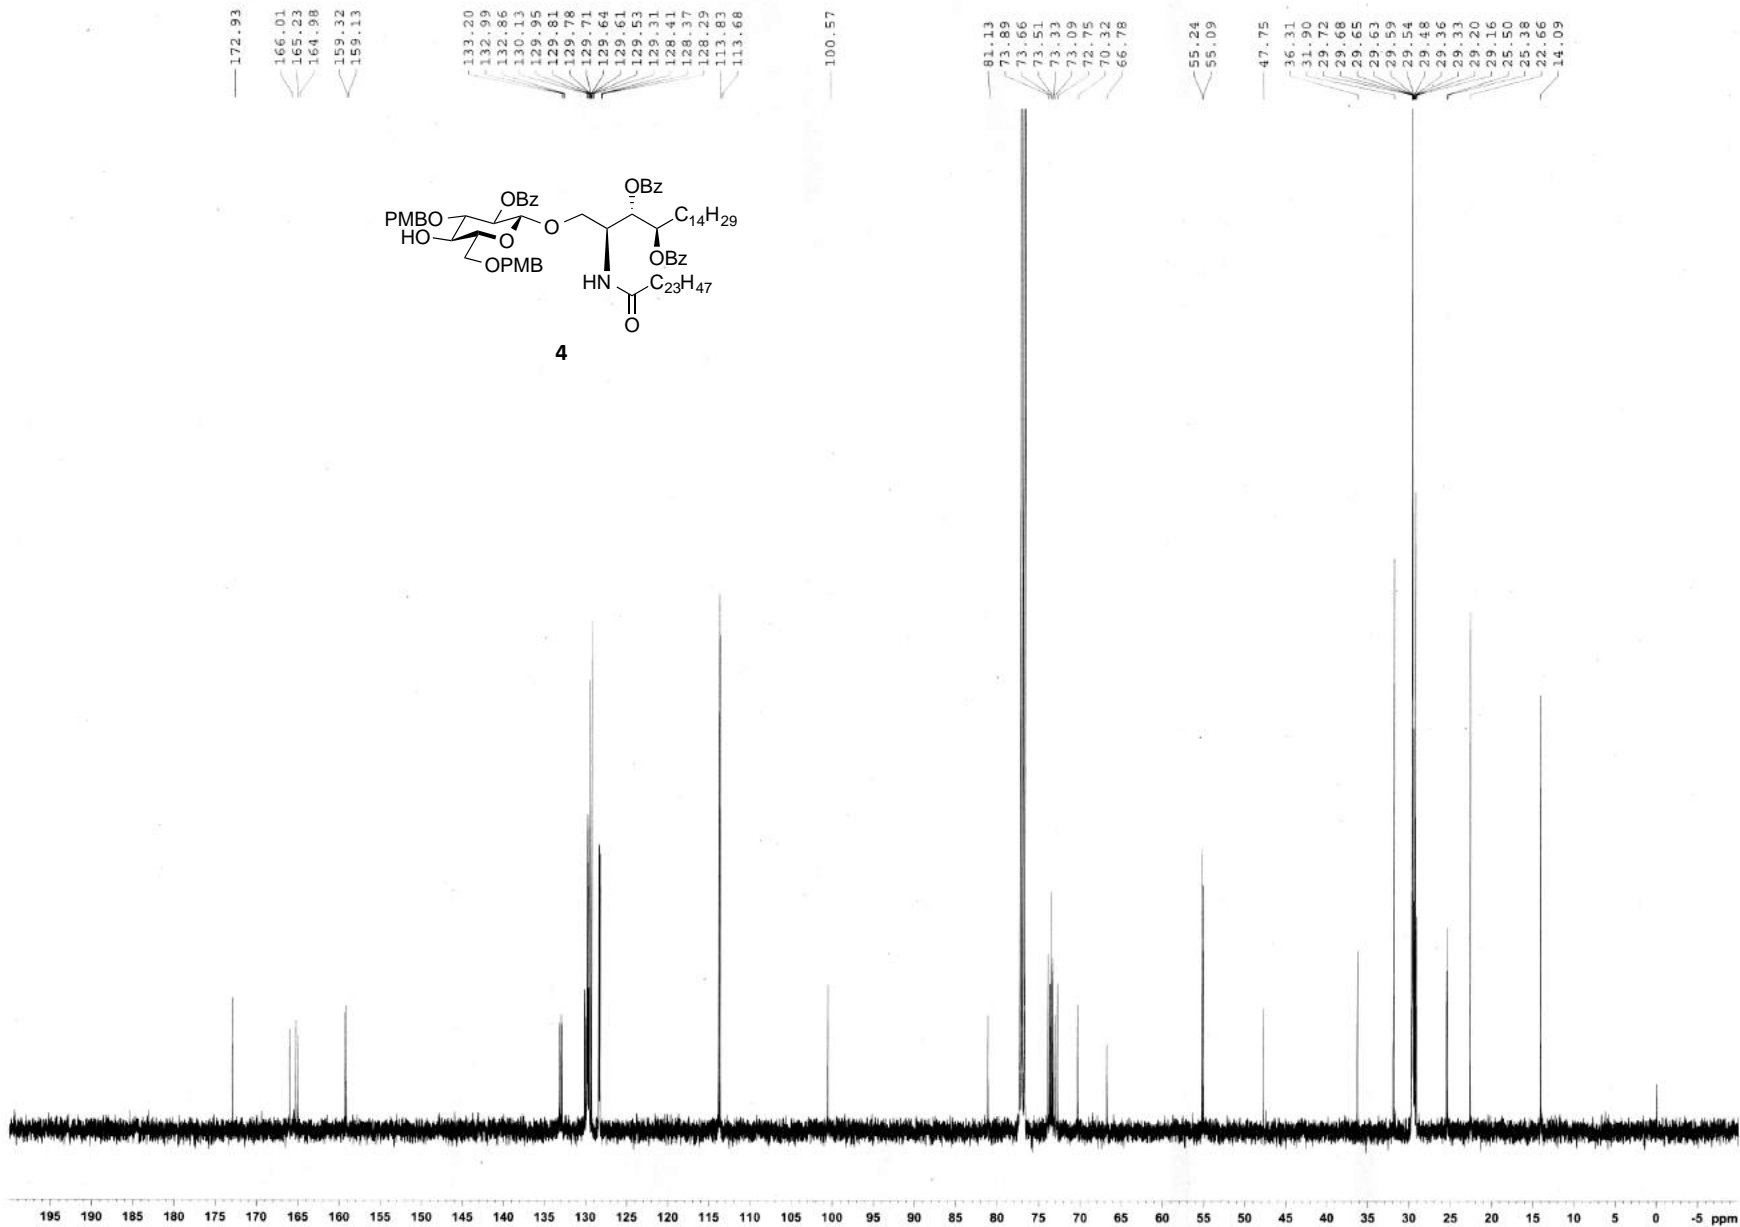

8.027  
8.013  
8.010  
8.001  
7.988  
7.986  
7.955  
7.941  
7.926  
7.923  
7.913  
7.906  
7.903  
7.898  
7.896  
7.871  
7.857  
7.604  
7.569  
7.557  
7.545  
7.528  
7.442  
7.435  
7.432  
7.431  
7.431  
7.423  
7.420  
7.420  
7.407  
7.392  
7.344  
7.328  
7.320  
7.313  
7.304  
7.289  
7.170  
7.111  
7.098  
7.077  
7.077  
7.044  
7.027  
6.990  
6.973  
6.718  
6.701  
6.613  
6.596  
6.019  
5.516  
5.510  
5.502  
5.494  
5.487  
5.454  
5.447  
5.332  
5.193  
5.193  
5.097  
5.081  
5.030  
5.029  
4.774  
4.774  
4.759  
4.742  
4.721  
4.553  
4.537  
4.525  
4.513  
4.501  
4.490  
4.483  
4.311  
4.309  
4.291  
4.281  
4.061  
3.974  
3.950  
3.921  
3.915  
3.910  
3.903  
3.741  
3.690  
3.675  
3.638  
2.567  
2.531  
2.403  
2.363  
2.111  
2.111  
1.989  
1.833  
1.344  
1.258  
1.243  
1.235  
1.162  
1.162  
1.089  
1.073  
0.891  
0.883  
0.878  
0.870  
0.864  
0.856  
0.849

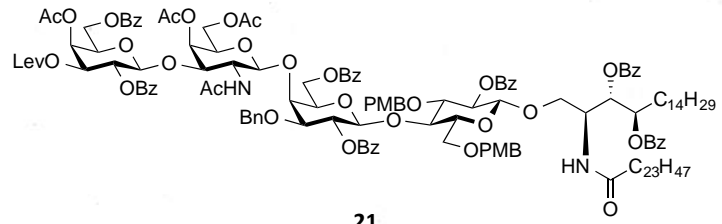

21

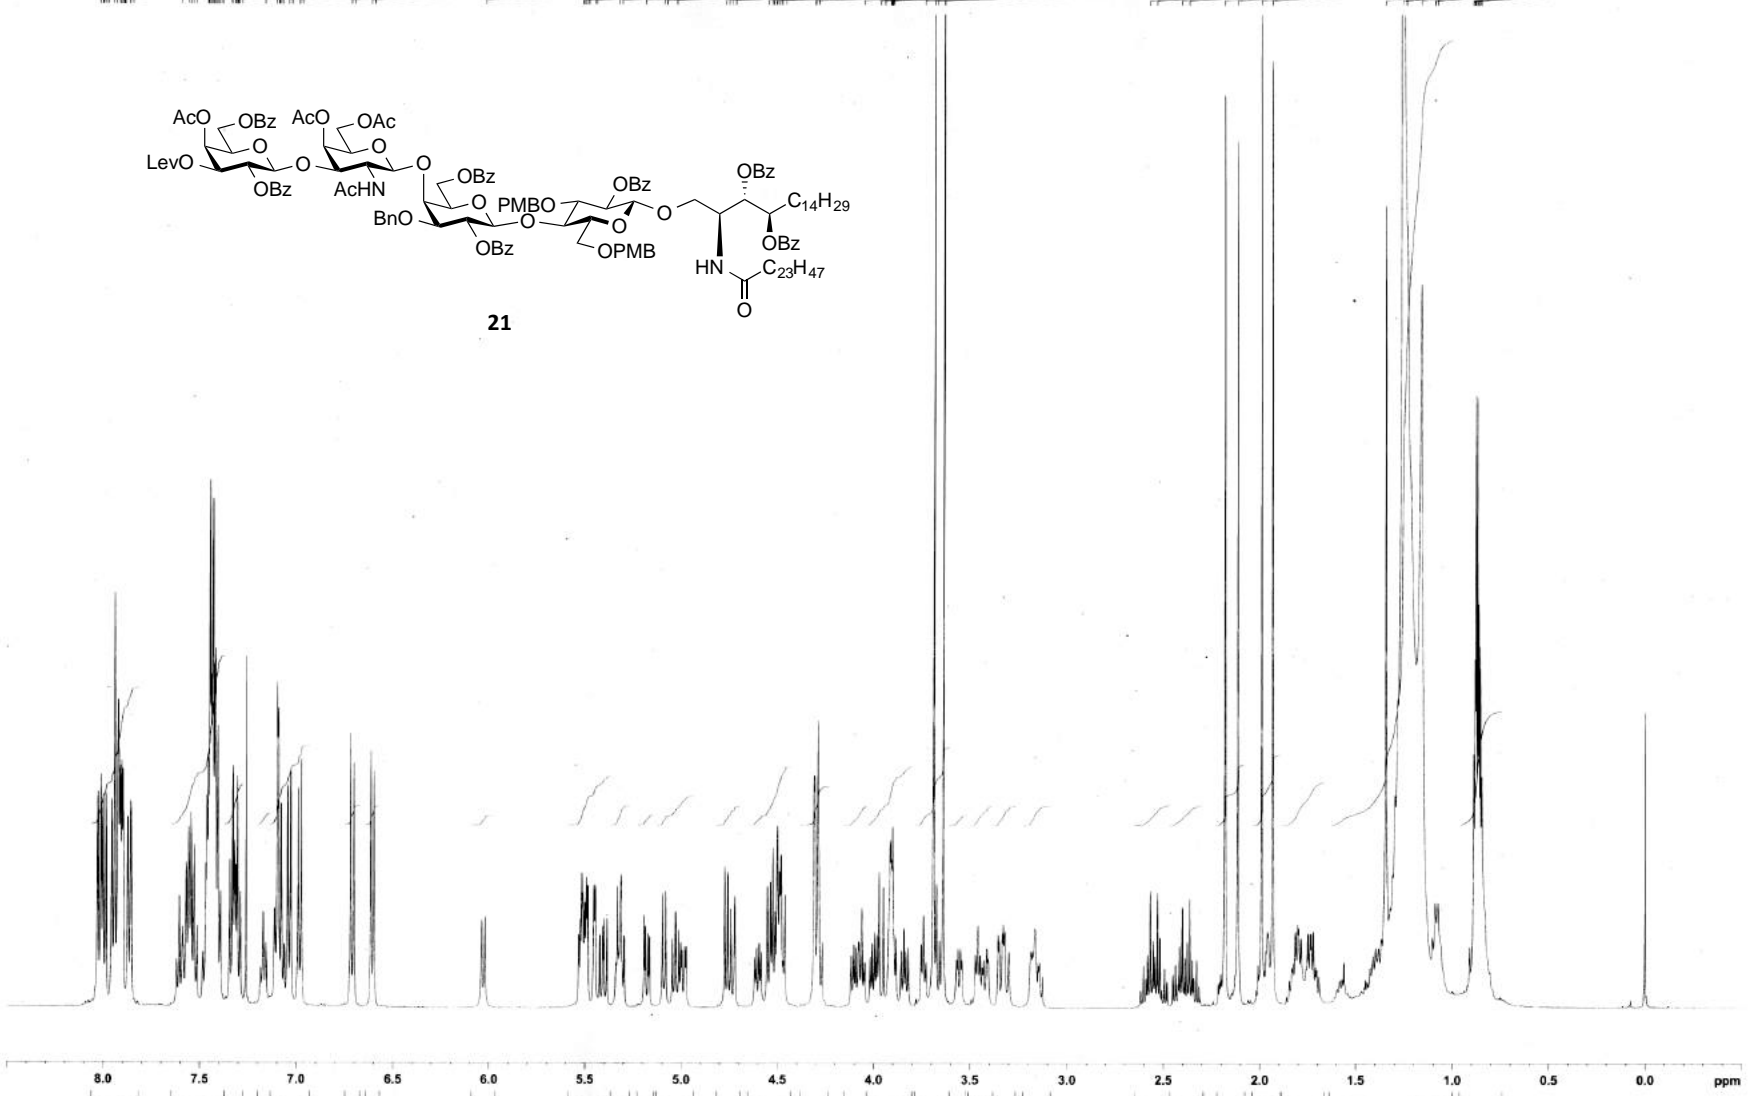

14.61  
18.10  
4.26  
1.17  
8.42  
2.00  
1.96  
0.93  
5.19  
2.03  
1.04  
3.03  
2.01  
6.22  
4.15  
2.07  
6.24  
8.33  
1.08  
2.05  
2.00  
2.01  
2.17  
2.16  
6.50  
7.56  
4.60  
84.41  
12.28

ppm

205.64

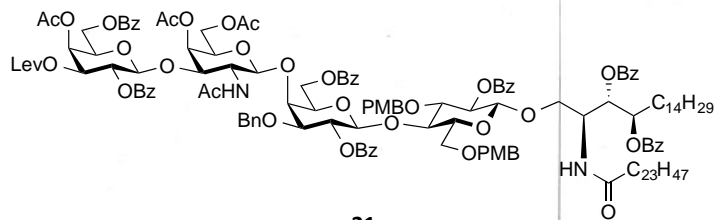

21

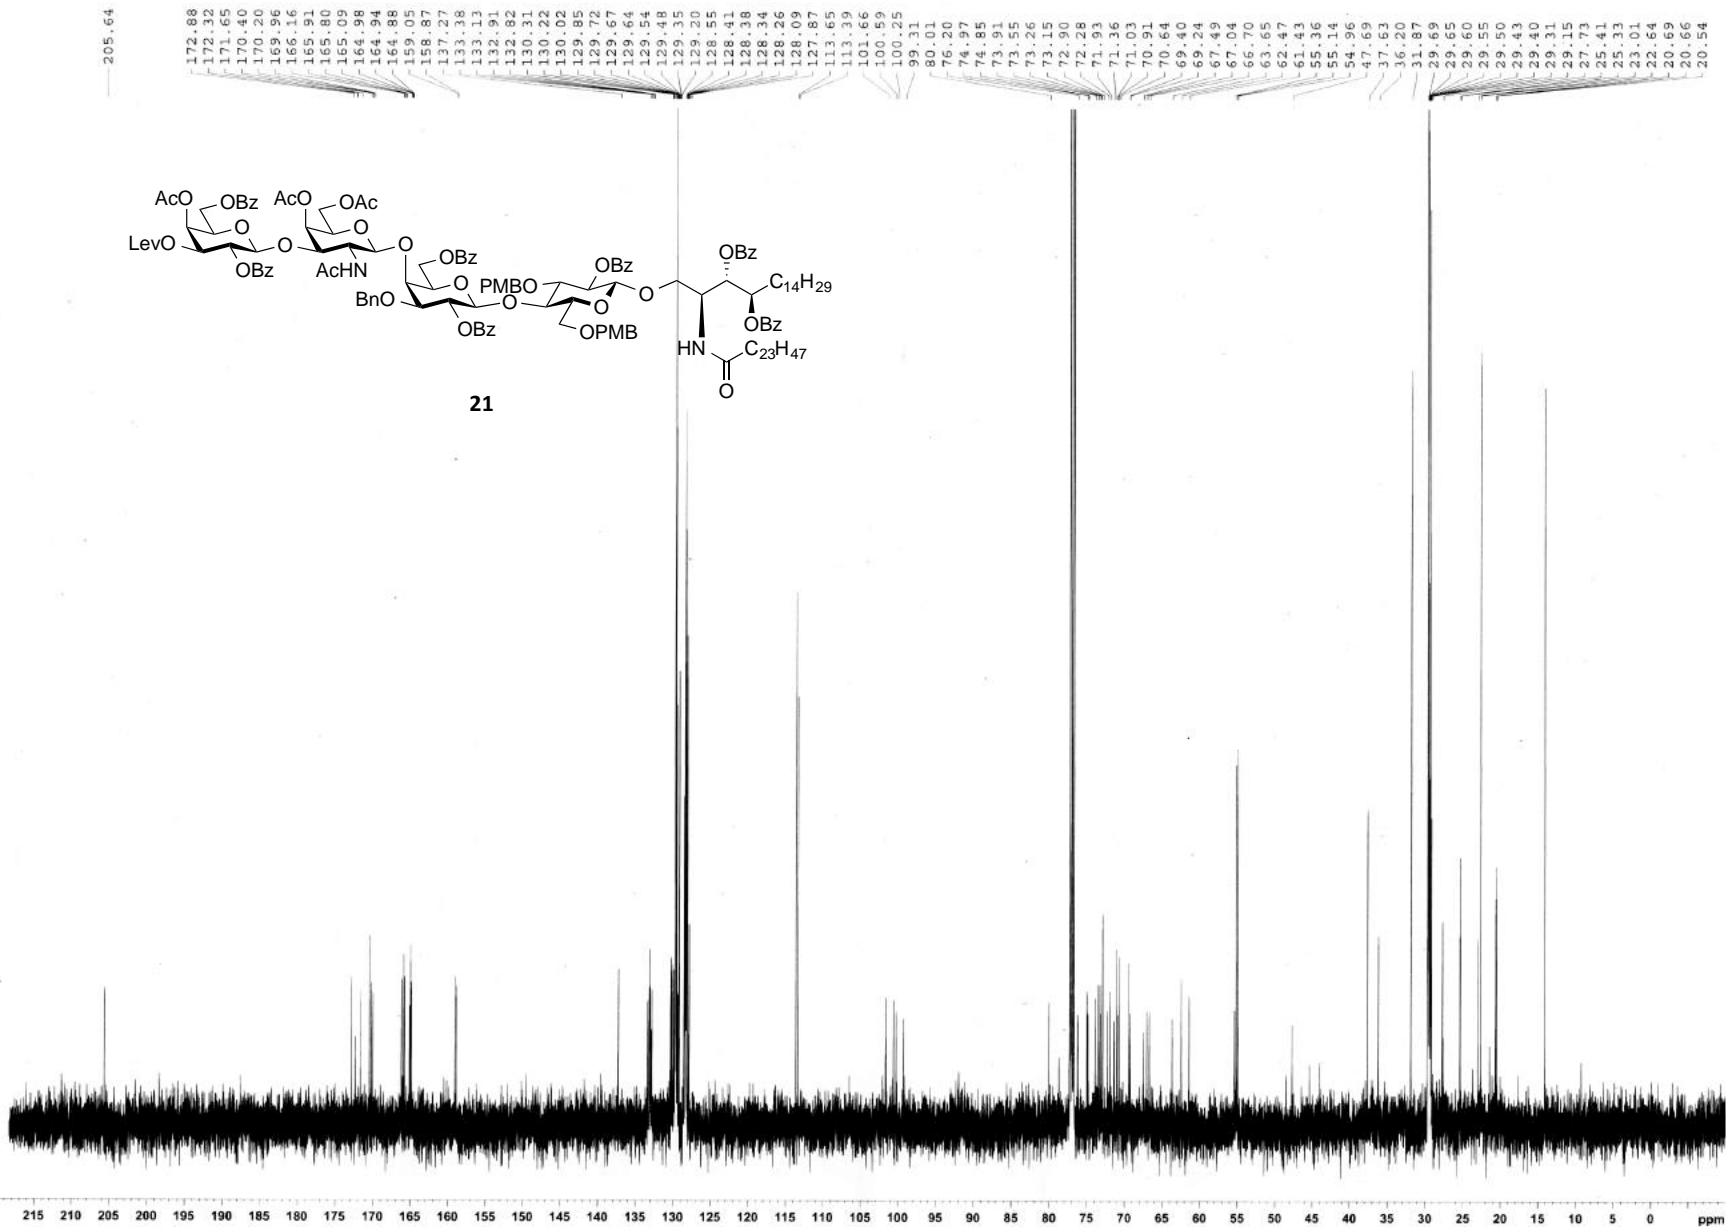

8.051  
8.033  
8.016  
7.960  
7.935  
7.933  
7.914  
7.910  
7.899  
7.897  
7.894  
7.892  
7.628  
7.617  
7.614  
7.602  
7.566  
7.551  
7.536  
7.520  
7.504  
7.489  
7.480  
7.464  
7.451  
7.433  
7.433  
7.393  
7.378  
7.362  
7.351  
7.335  
7.323  
7.308  
7.173  
7.072  
6.827  
6.827  
6.308  
5.990  
5.922  
5.906  
5.498  
5.447  
5.431  
5.426  
5.410  
5.381  
5.377  
5.361  
5.215  
5.208  
5.194  
5.187  
5.095  
5.078  
5.039  
5.023  
5.019  
4.772  
4.757  
4.737  
4.716  
4.511  
4.511  
4.501  
4.487  
4.363  
4.348  
4.348  
4.302  
4.292  
4.279  
4.279  
4.266  
4.070  
4.012  
4.002  
3.917  
3.902  
3.894  
3.894  
3.782  
3.773  
3.773  
3.762  
3.638  
3.480  
3.474  
3.474  
3.459  
3.454  
3.127  
3.037  
2.586  
2.572  
2.550  
2.537  
2.424  
2.394  
2.380  
2.137  
2.137  
2.050  
2.015  
2.002  
1.400  
1.241  
1.234  
1.172  
0.892  
0.883  
0.878  
0.870  
0.864  
0.855

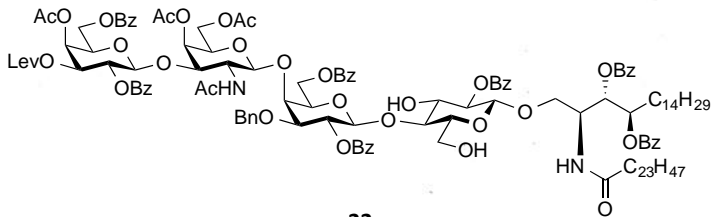

22

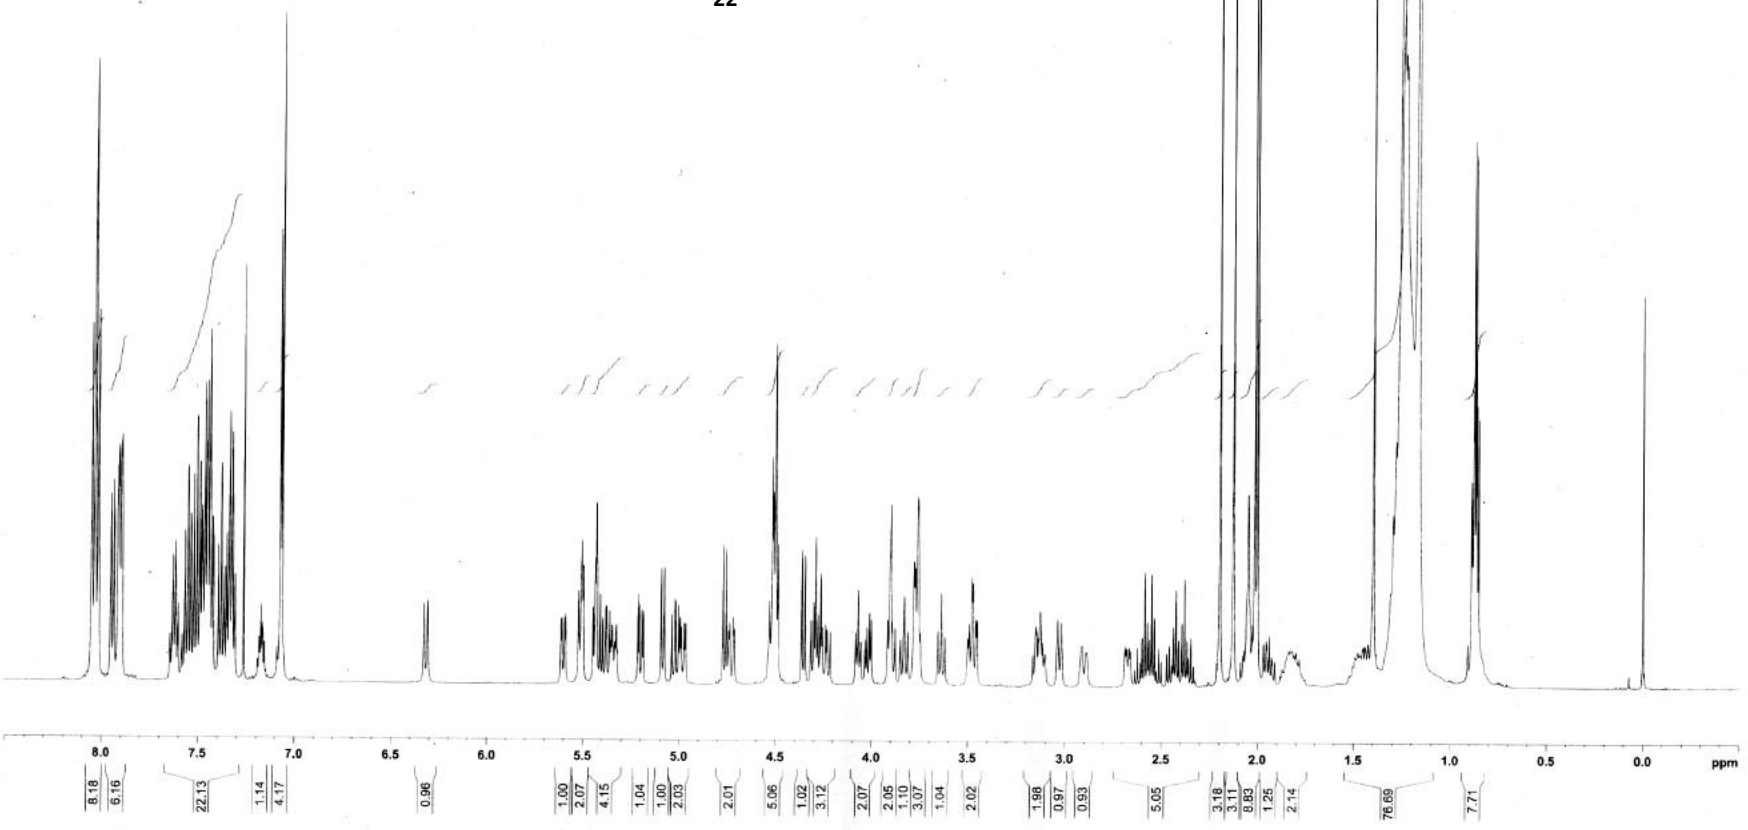

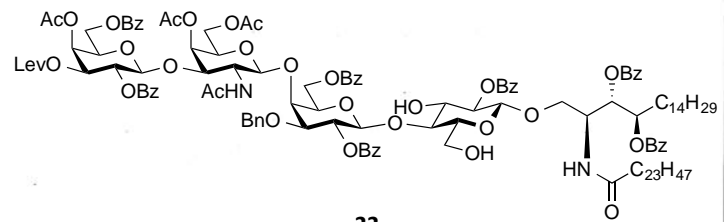

22

172.97  
171.68  
170.49  
170.24  
169.84  
166.49  
166.14  
165.81  
165.59  
165.00  
164.94

136.77  
133.16  
132.79  
130.01  
129.87  
129.77  
129.73  
129.60  
129.50  
129.42  
129.35  
129.29  
128.63  
128.48  
128.42  
128.38  
128.31  
128.18  
128.09

101.74  
99.46  
99.21

80.39  
77.57  
73.92  
73.70  
73.10  
72.23  
71.90  
70.96  
70.70  
69.39  
69.26  
64.12  
62.62  
61.48  
55.26  
47.96  
37.66  
36.48  
31.88  
29.70  
29.66  
29.61  
29.57  
29.52  
29.46  
29.42  
29.31  
29.29  
27.19  
25.46  
23.03  
22.55  
20.77  
20.68  
14.08

8.048  
8.033  
8.019  
8.016  
7.986  
7.975  
7.921  
7.909  
7.884  
7.869  
7.583  
7.574  
7.571  
7.557  
7.540  
7.525  
7.509  
7.494  
7.479  
7.463  
7.447  
7.432  
7.405  
7.394  
7.378  
7.363  
7.348  
7.333  
7.154  
7.097  
7.085  
7.071  
6.042  
6.036  
6.030  
6.018  
5.925  
5.528  
5.508  
5.502  
5.484  
5.438  
5.433  
5.417  
5.290  
5.271  
5.263  
5.252  
5.247  
5.244  
5.228  
5.213  
5.207  
5.192  
5.186  
5.149  
5.132  
5.000  
4.980  
4.965  
4.904  
4.789  
4.520  
4.509  
4.498  
4.483  
4.340  
4.324  
4.314  
4.307  
4.298  
4.291  
4.281  
4.277  
4.056  
3.947  
3.915  
3.883  
3.873  
3.798  
3.656  
3.649  
3.600  
3.453  
2.581  
2.567  
2.549  
2.422  
2.383  
2.334  
2.194  
2.112  
2.052  
1.894  
1.822  
1.817  
1.805  
1.793  
1.788  
1.621  
1.435  
1.258  
1.177  
0.891  
0.884  
0.878  
0.870  
0.864  
0.856

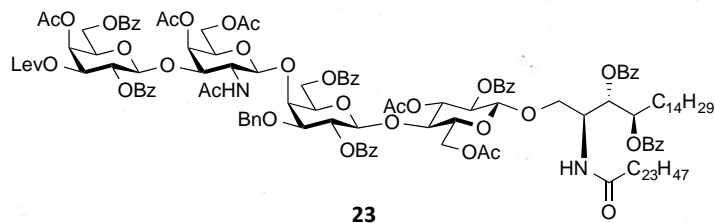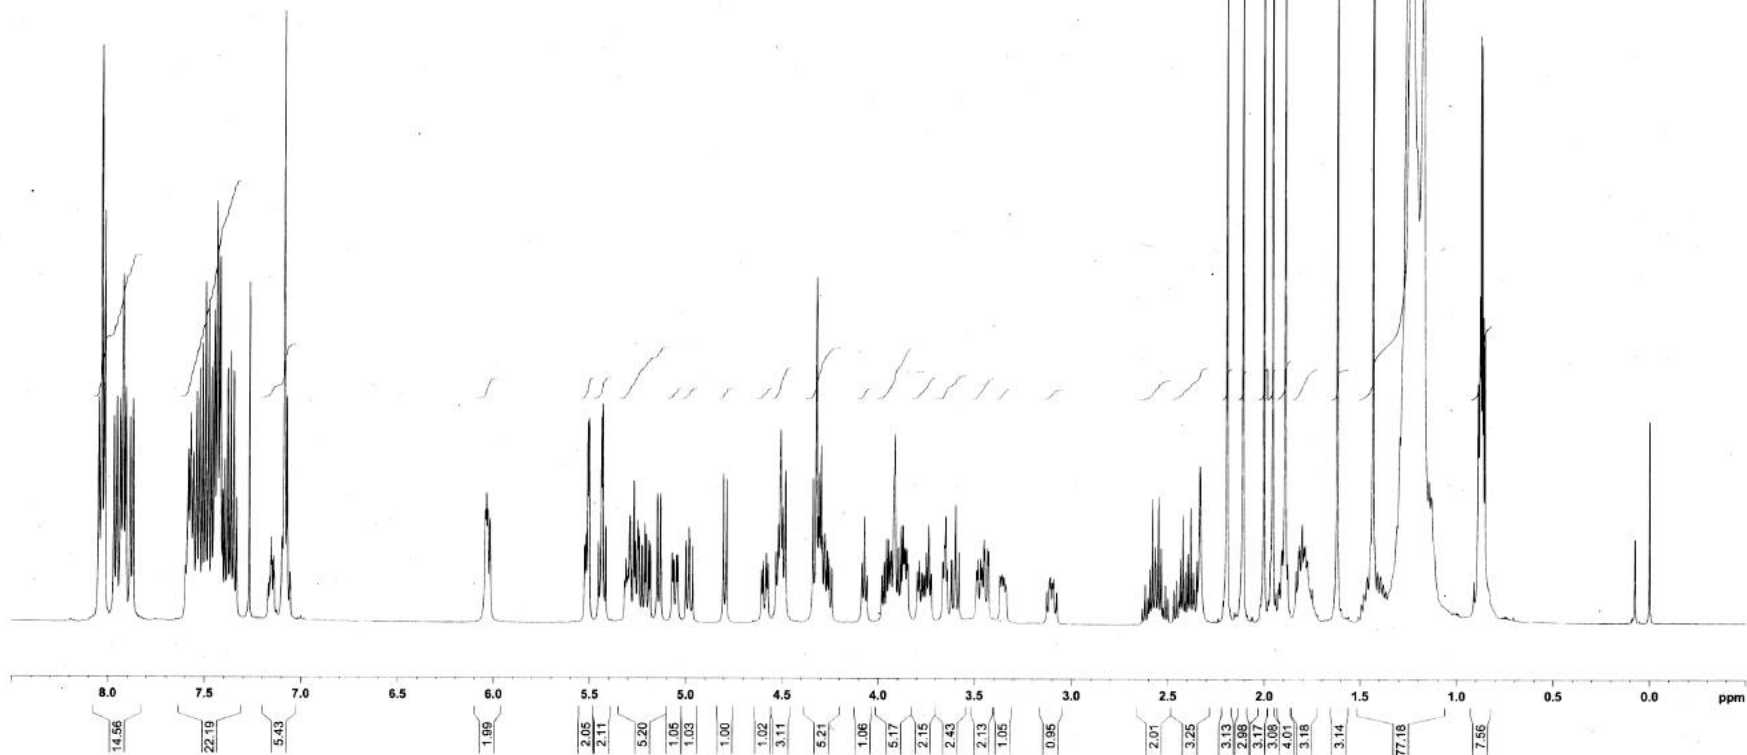

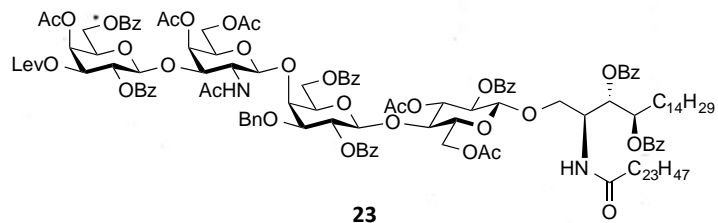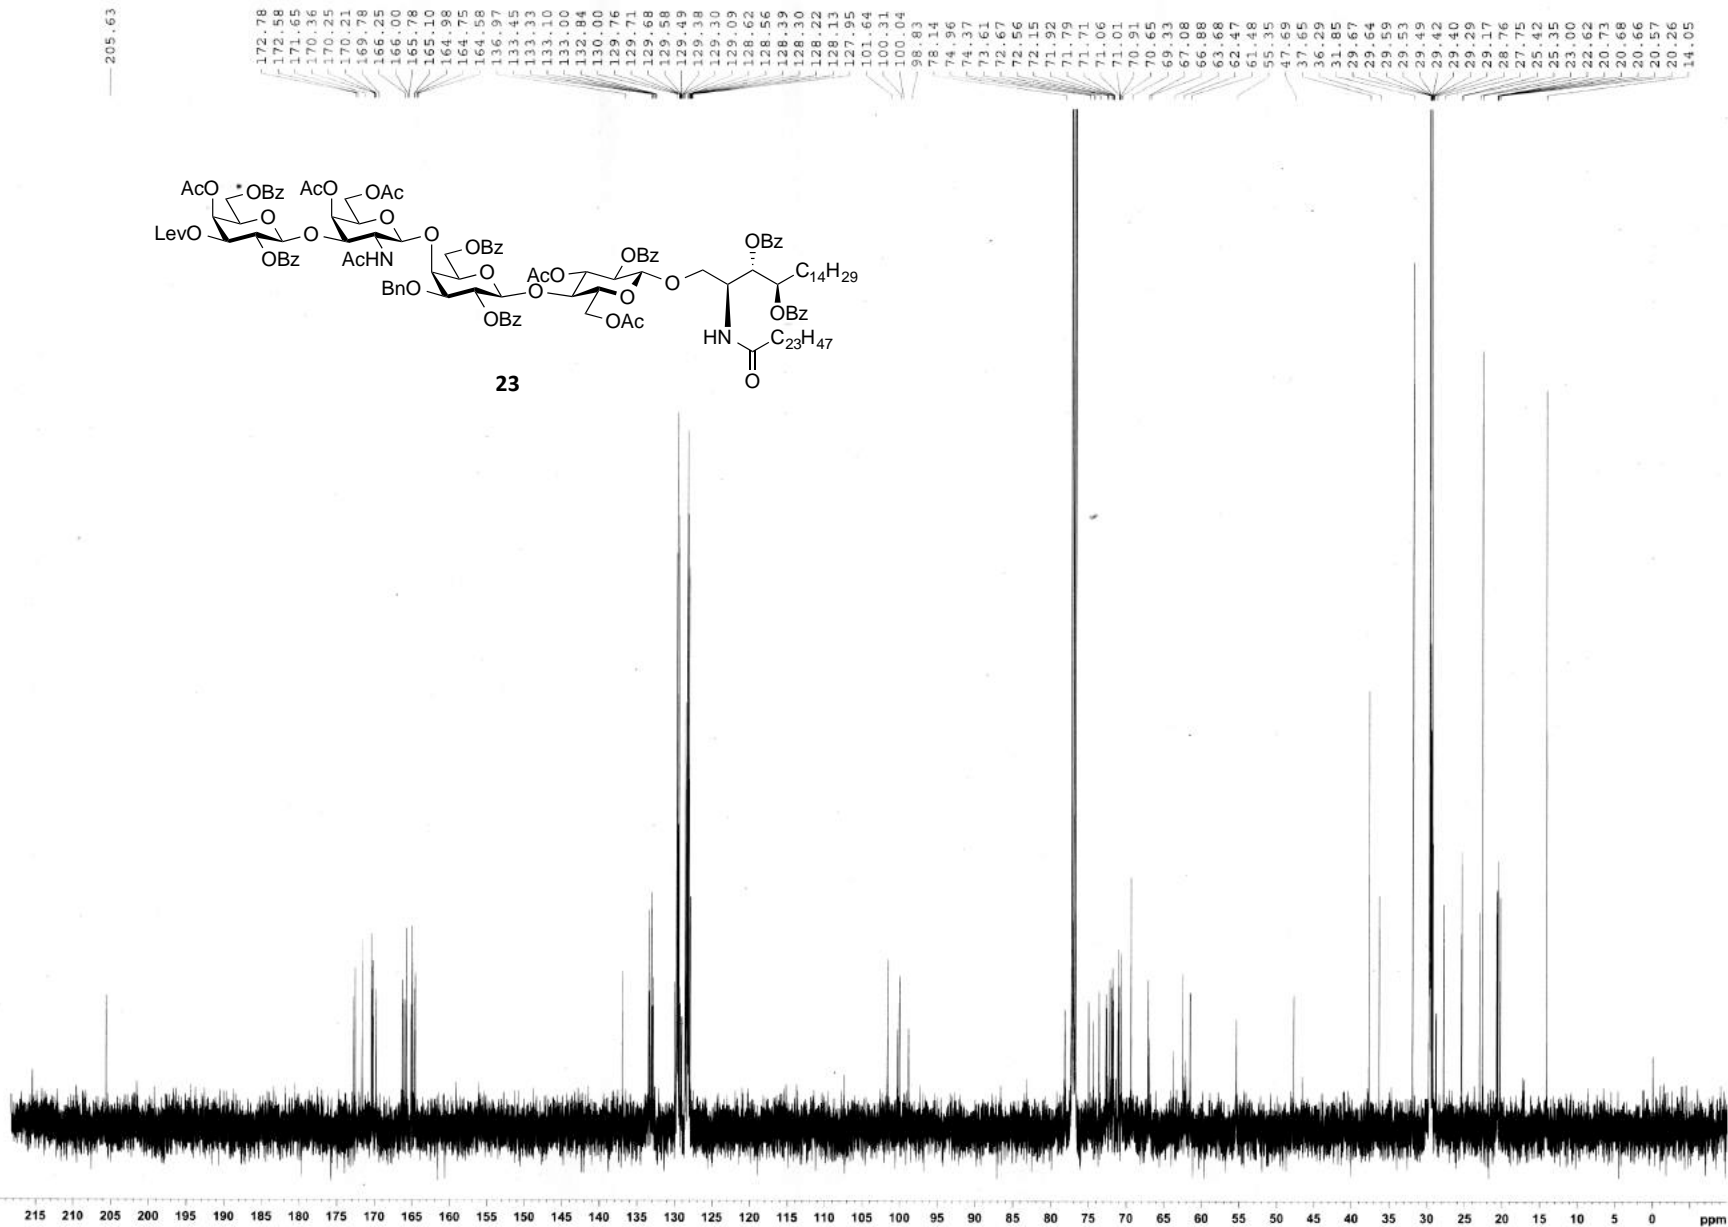

8.050  
8.032  
8.016  
8.001  
7.982  
7.961  
7.952  
7.935  
7.921  
7.580  
7.577  
7.563  
7.548  
7.539  
7.533  
7.525  
7.506  
7.497  
7.491  
7.482  
7.473  
7.456  
7.450  
7.441  
7.434  
7.418  
7.410  
7.401  
7.395  
7.386  
7.379  
7.364  
7.349  
7.333  
6.082  
6.074  
6.017  
6.004  
5.582  
5.569  
5.559  
5.551  
5.507  
5.502  
5.495  
5.434  
5.429  
5.413  
5.260  
5.241  
5.226  
5.220  
5.206  
5.012  
4.996  
4.993  
4.977  
4.962  
4.952  
4.927  
4.781  
4.741  
4.510  
4.506  
4.497  
4.487  
4.481  
4.474  
4.404  
4.388  
4.334  
4.319  
4.300  
4.288  
4.277  
4.160  
4.150  
4.072  
3.993  
3.949  
3.868  
3.853  
3.715  
3.678  
3.659  
2.581  
2.542  
2.409  
2.369  
2.152  
2.145  
1.992  
1.959  
1.894  
1.861  
1.820  
1.797  
1.792  
1.779  
1.712  
1.589  
1.424  
1.297  
1.283  
1.257  
1.177  
0.884  
0.852  
0.879  
0.871  
0.865  
0.856  
0.847

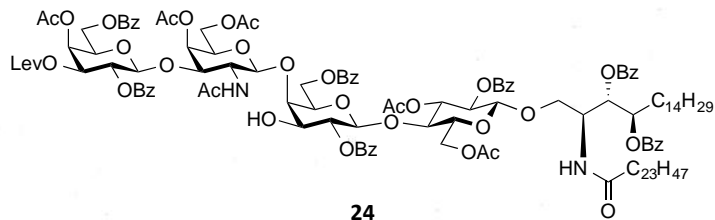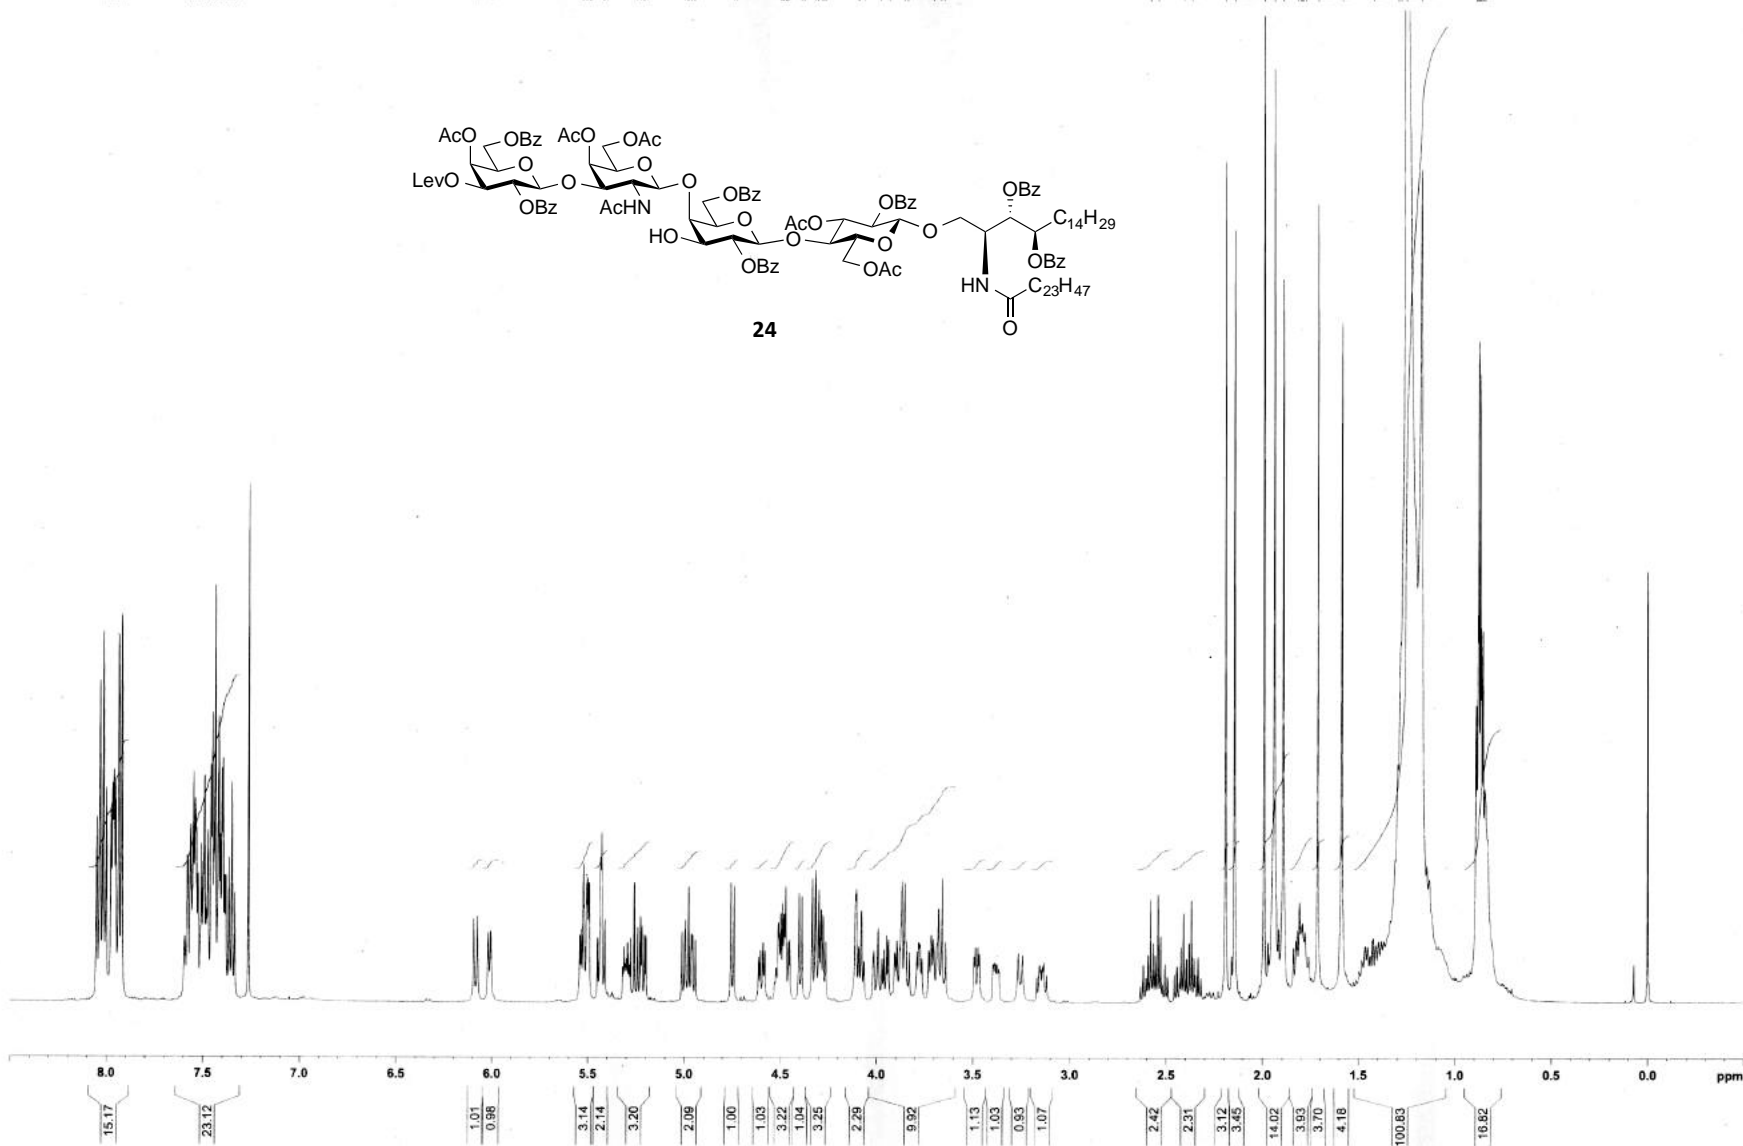



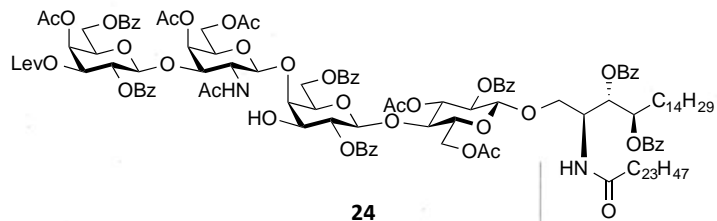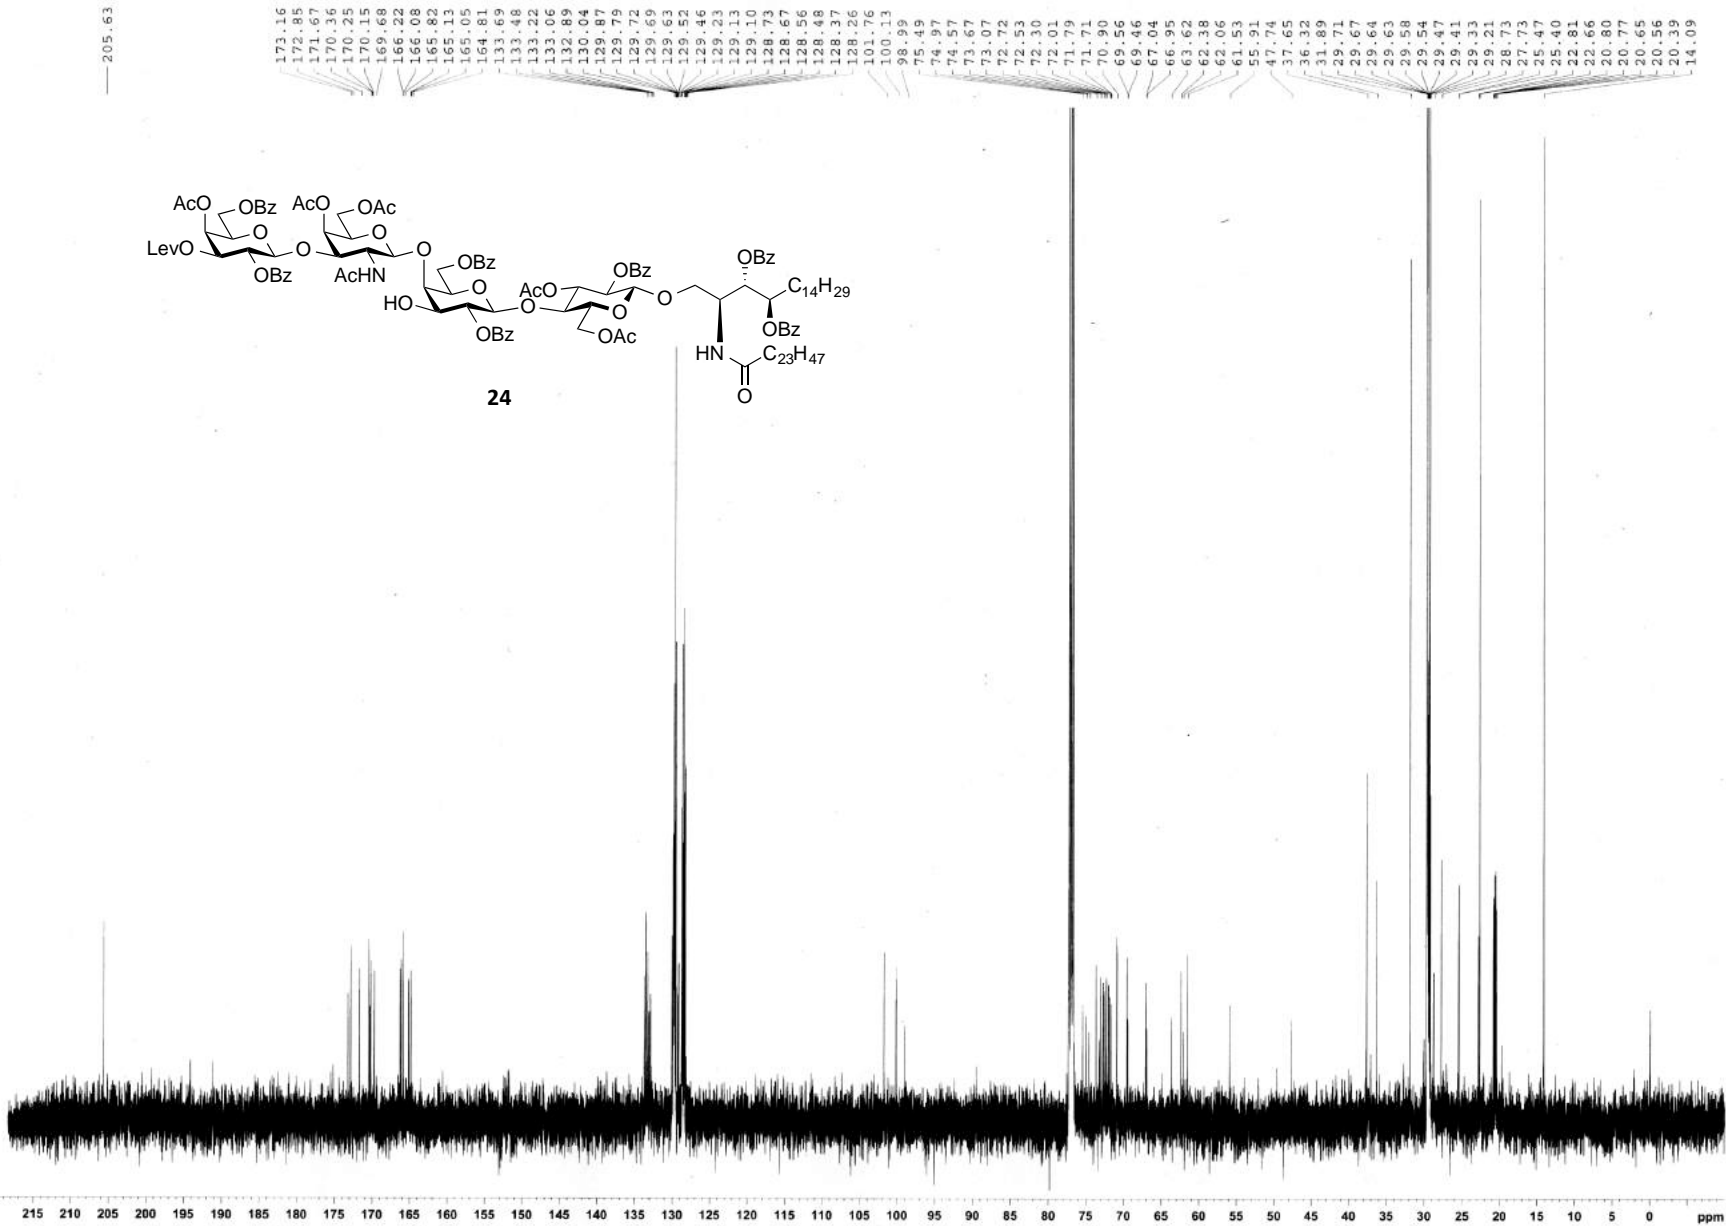

8.042  
8.027  
8.025  
8.013  
7.998  
7.981  
7.966  
7.964  
7.955  
7.941  
7.910  
7.906  
7.897  
7.865  
7.551  
7.538  
7.521  
7.523  
7.509  
7.495  
7.452  
7.442  
7.461  
7.449  
7.436  
7.420  
7.402  
7.390  
7.387  
7.375  
7.371  
7.361  
7.346  
7.330  
6.002  
5.481  
5.387  
5.351  
5.223  
4.975  
4.798  
4.783  
4.588  
4.583  
4.576  
4.489  
4.481  
4.466  
4.432  
4.416  
4.332  
4.316  
4.300  
4.287  
4.277  
4.087  
4.082  
3.850  
3.837  
3.831  
3.815  
3.808  
3.666  
3.660  
3.645  
3.642  
3.070  
3.059  
3.055  
3.045  
3.041  
3.030  
2.956  
2.923  
2.912  
2.902  
2.179  
2.100  
1.985  
1.951  
1.951  
1.951  
1.763  
1.758  
1.751  
1.730  
1.713  
1.686  
1.492  
1.447  
1.433  
1.428  
1.423  
1.418  
1.389  
1.375  
1.361  
1.348  
1.321  
1.306  
1.292  
1.255  
1.169  
0.893  
0.879  
0.870  
0.866  
0.856  
0.845  
0.832

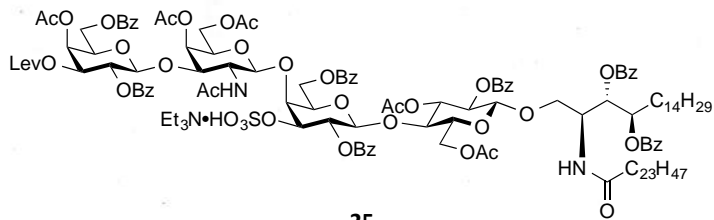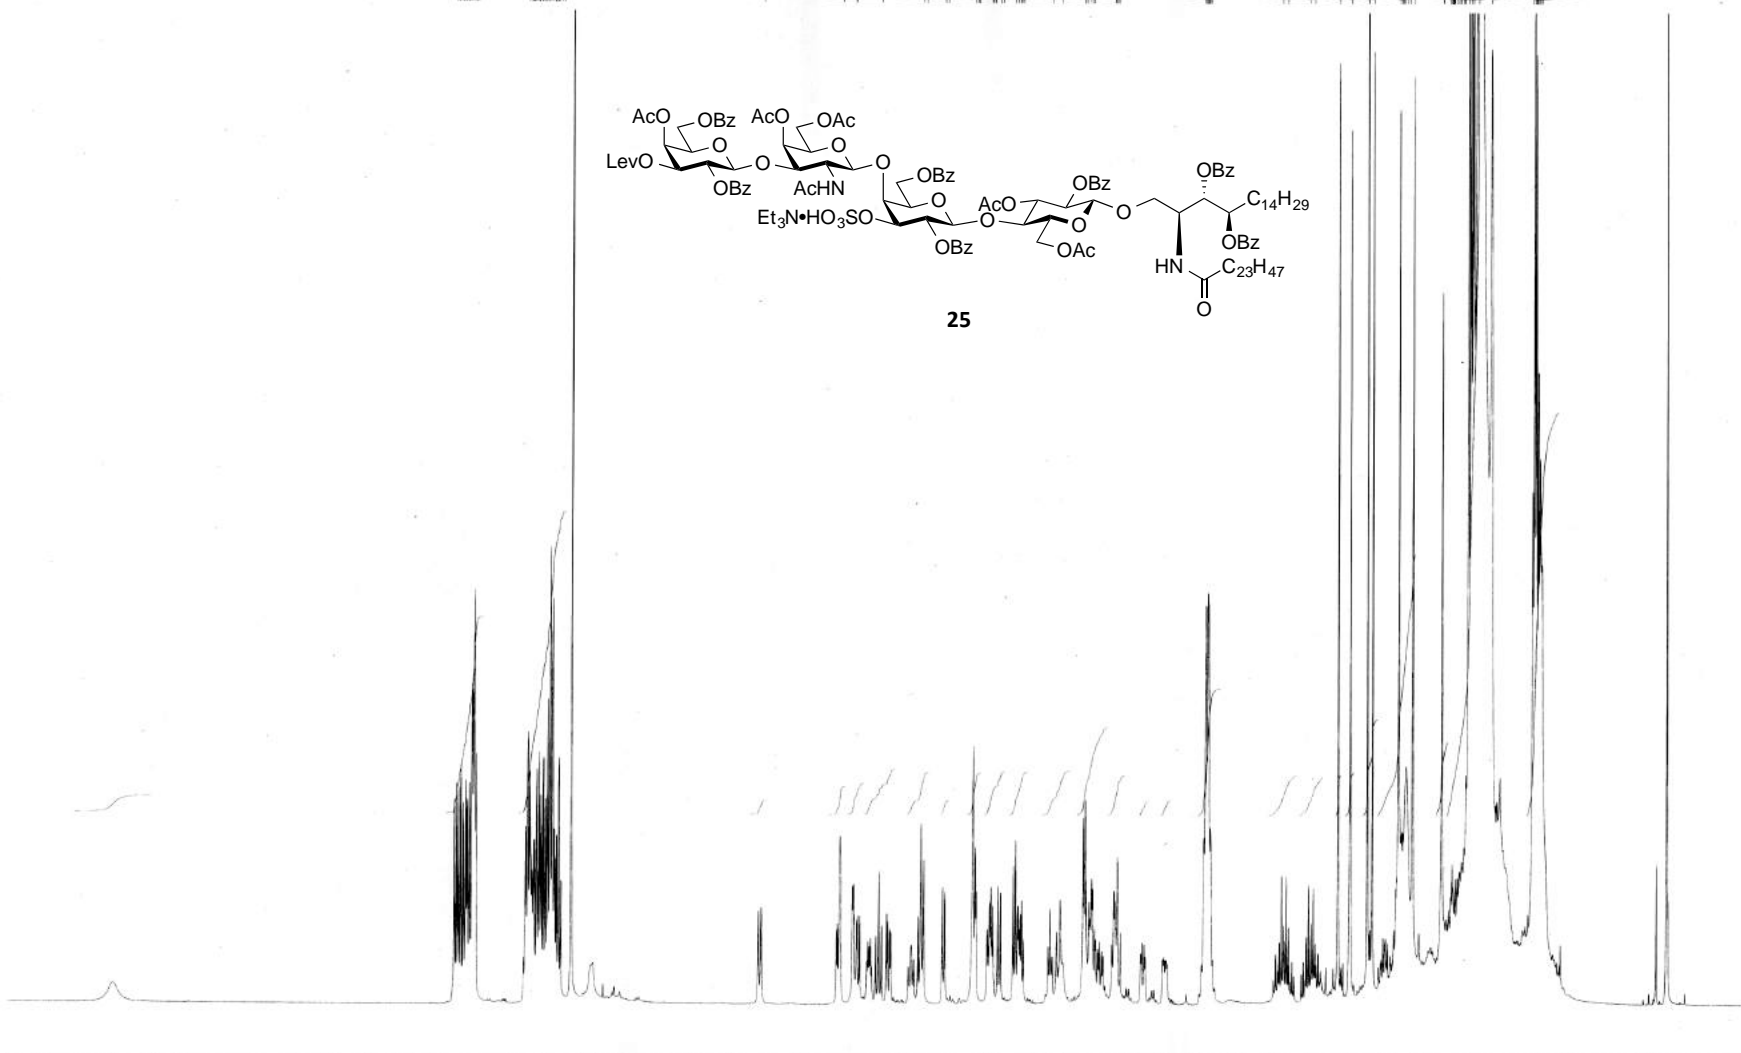

10.5 10.0 9.5 9.0 8.5 8.0 7.5 7.0 6.5 6.0 5.5 5.0 4.5 4.0 3.5 3.0 2.5 2.0 1.5 1.0 0.5 0.0 ppm

1.18  
14.18  
21.74  
1.00  
2.01  
2.27  
3.24  
3.02  
1.00  
3.00  
3.09  
3.10  
3.21  
6.36  
2.88  
0.89  
1.05  
9.11  
2.91  
2.79  
2.91  
3.10  
6.95  
18.92  
5.37  
145.66  
29.14

205.66

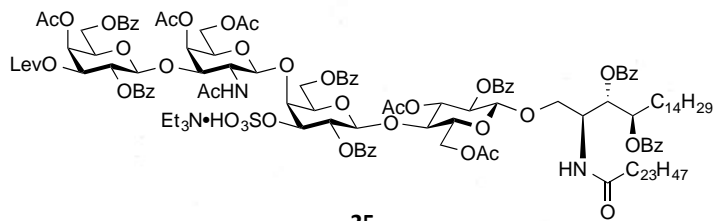

25

172.84  
171.61  
170.62  
170.12  
169.96  
169.37  
166.03  
165.85  
164.99  
164.95  
164.88

133.36  
133.27  
133.14  
132.90  
130.00  
129.73  
129.64  
129.58  
129.43  
129.40  
129.09  
128.62  
128.55  
128.52  
128.47  
128.39  
128.27

101.68  
99.83

77.57  
75.98  
73.54  
72.81  
72.28  
71.28  
71.10  
70.85  
69.82  
69.37  
67.15  
62.63  
61.72  
46.07  
37.65  
36.30  
31.89  
29.71  
29.67  
29.63  
29.57  
29.53  
29.51  
29.45  
29.43  
29.33  
29.20  
27.68  
25.92  
23.78  
22.80  
22.66  
20.72  
20.64  
20.61  
20.36  
14.08  
8.63

215 210 205 200 195 190 185 180 175 170 165 160 155 150 145 140 135 130 125 120 115 110 105 100 95 90 85 80 75 70 65 60 55 50 45 40 35 30 25 20 15 10 5 0 ppm

4.576  
4.558  
4.536  
4.520  
4.500  
4.484  
4.474  
4.459  
4.443  
4.421  
4.410  
4.204  
4.198  
4.190  
4.184  
4.149  
4.132  
4.128  
4.111  
4.079  
4.069  
4.063  
4.054  
4.044  
4.036  
4.032  
4.017  
3.947  
3.941  
3.821  
3.817  
3.811  
3.807  
3.798  
3.792  
3.787  
3.785  
3.775  
3.775  
3.751  
3.743  
3.742  
3.723  
3.716  
3.693  
3.678  
3.657  
3.643  
3.634  
3.620  
3.612  
3.603  
3.599  
3.580  
3.575  
3.564  
3.561  
3.550  
3.545  
3.523  
3.512  
3.497  
3.492  
3.482  
3.478  
3.466  
3.462  
3.450  
3.446  
3.438  
3.431  
3.420  
3.411  
3.403  
3.386  
3.373  
3.367  
3.354  
3.347  
3.327  
3.317  
3.309  
3.303  
3.293  
3.289  
3.216  
3.213  
3.210  
3.207  
3.203  
3.181  
3.172  
3.165  
3.156  
3.147  
2.127  
2.112  
2.097  
1.949  
1.949  
1.532  
1.518  
1.505  
1.490  
1.465  
1.450  
1.329  
1.310  
1.290  
1.288  
1.191  
1.037  
0.816  
0.802  
0.768

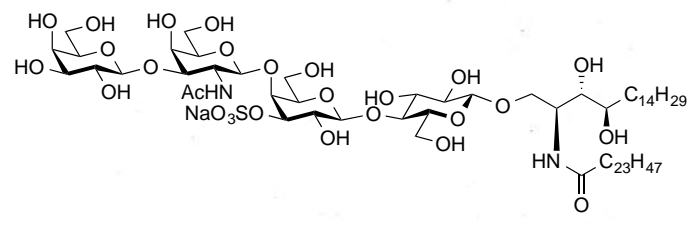

SM1a (1)

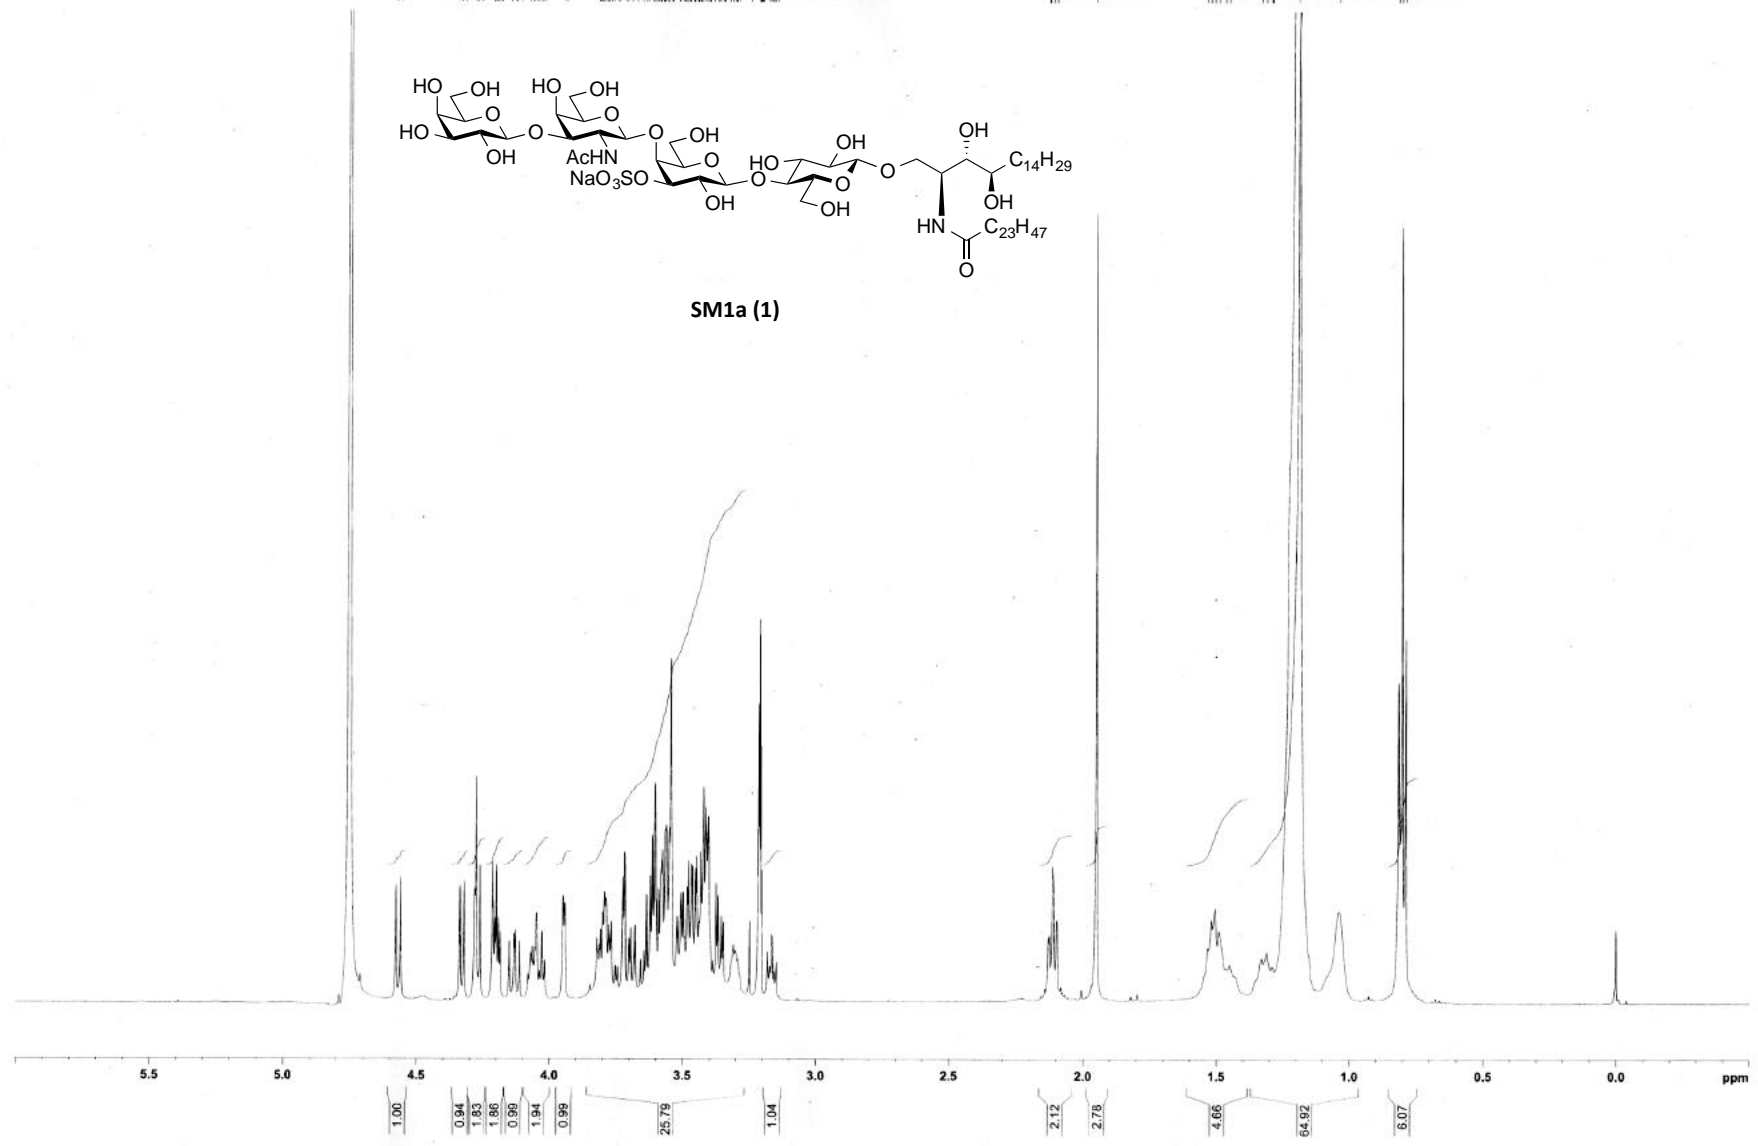

zgig30

171.95  
171.05

104.66  
103.44  
103.36  
81.03  
80.75  
78.00  
75.98  
75.35  
75.23  
74.84  
74.31  
73.80  
73.43  
73.26  
72.97  
72.30  
70.72  
70.56  
69.80  
69.57  
69.07  
68.17  
67.24  
65.18  
62.81  
60.79  
60.53  
60.17  
59.45  
50.97  
50.22  
39.98  
35.57  
31.36  
31.33  
30.70  
29.33  
29.28  
29.22  
29.20  
29.16  
29.10  
29.03  
29.01  
28.79  
28.74  
28.71

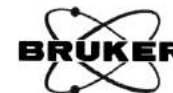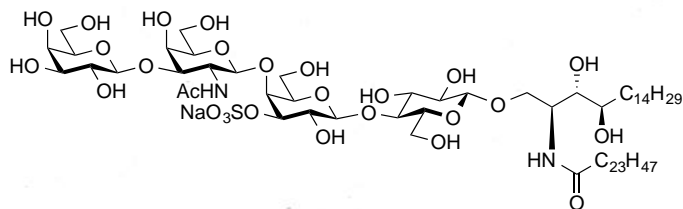

SM1a (1)

Current Data Parameters  
NAME SM1a  
EXPRO 100013  
PROCNO 1

F2 - Acquisition Parameters  
Date 20140925  
Time 10.09  
INSTRUM spect  
PROBHD 5 mm CPTCI-1H-  
PULPROG zgigj0  
TD 65356  
SOLVENT DMSO  
NS 30094  
DS 8  
SMH 48076.922 Hz  
FIDRES 0.735618 Hz  
AQ 0.6797024 sec  
RG 203  
DM 10.400 usec  
DE 18.00 usec  
TE 293.2 K  
D1 2.00000000 sec  
D11 0.03000000 sec  
TD0 1

==== CHANNEL f1 =====  
SFO1 201.2179973 MHz  
NUC1 13C  
P1 10.60 usec  
PLW1 159.58999634 W

==== CHANNEL f2 =====  
SFO2 800.1532006 MHz  
NUC2 1H  
CFDRG[2] waltz16  
PCPD2 100.00 usec  
PLW2 7.53359985 W  
PLW12 0.03616600 W

F2 - Processing parameters  
SI 32768  
SF 201.19799884 MHz  
WDW EM  
SSB 0  
LB 1.00 Hz  
GB 0  
PC 1.40

200 190 180 170 160 150 140 130 120 110 100 90 80 70 60 50 40 30 20 10 ppm

8.069  
8.055  
8.052  
8.038  
8.036  
8.019  
8.019  
7.975  
7.960  
7.958  
7.944  
7.941  
7.931  
7.925  
7.923  
7.916  
7.914  
7.909  
7.906  
7.583  
7.577  
7.571  
7.566  
7.558  
7.556  
7.553  
7.546  
7.541  
7.538  
7.534  
7.531  
7.526  
7.526  
7.520  
7.516  
7.513  
7.510  
7.494  
7.483  
7.479  
7.471  
7.467  
7.445  
7.440  
7.431  
7.415  
7.406  
7.399  
7.390  
7.384  
7.375  
7.364  
7.348  
7.333  
5.473  
5.473  
5.432  
5.425  
5.116  
5.116  
5.234  
5.230  
4.998  
4.995  
4.983  
4.979  
4.723  
4.708  
4.503  
4.495  
4.490  
4.476  
4.476  
4.382  
4.367  
4.324  
4.305  
4.303  
4.293  
4.094  
4.089  
4.007  
3.995  
3.982  
3.950  
3.943  
3.860  
3.846  
3.838  
3.823  
3.692  
3.689  
3.635  
2.398  
2.162  
1.934  
1.914  
1.795  
1.784  
1.778  
1.687  
1.643  
1.256  
1.235  
1.175  
1.137  
1.123  
0.892  
0.883  
0.878  
0.870  
0.864  
0.856

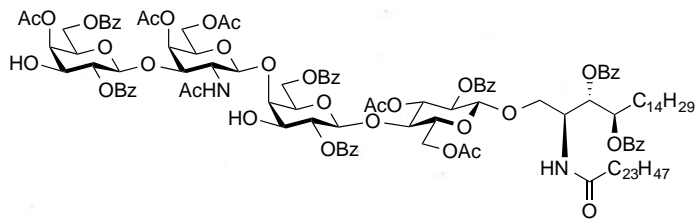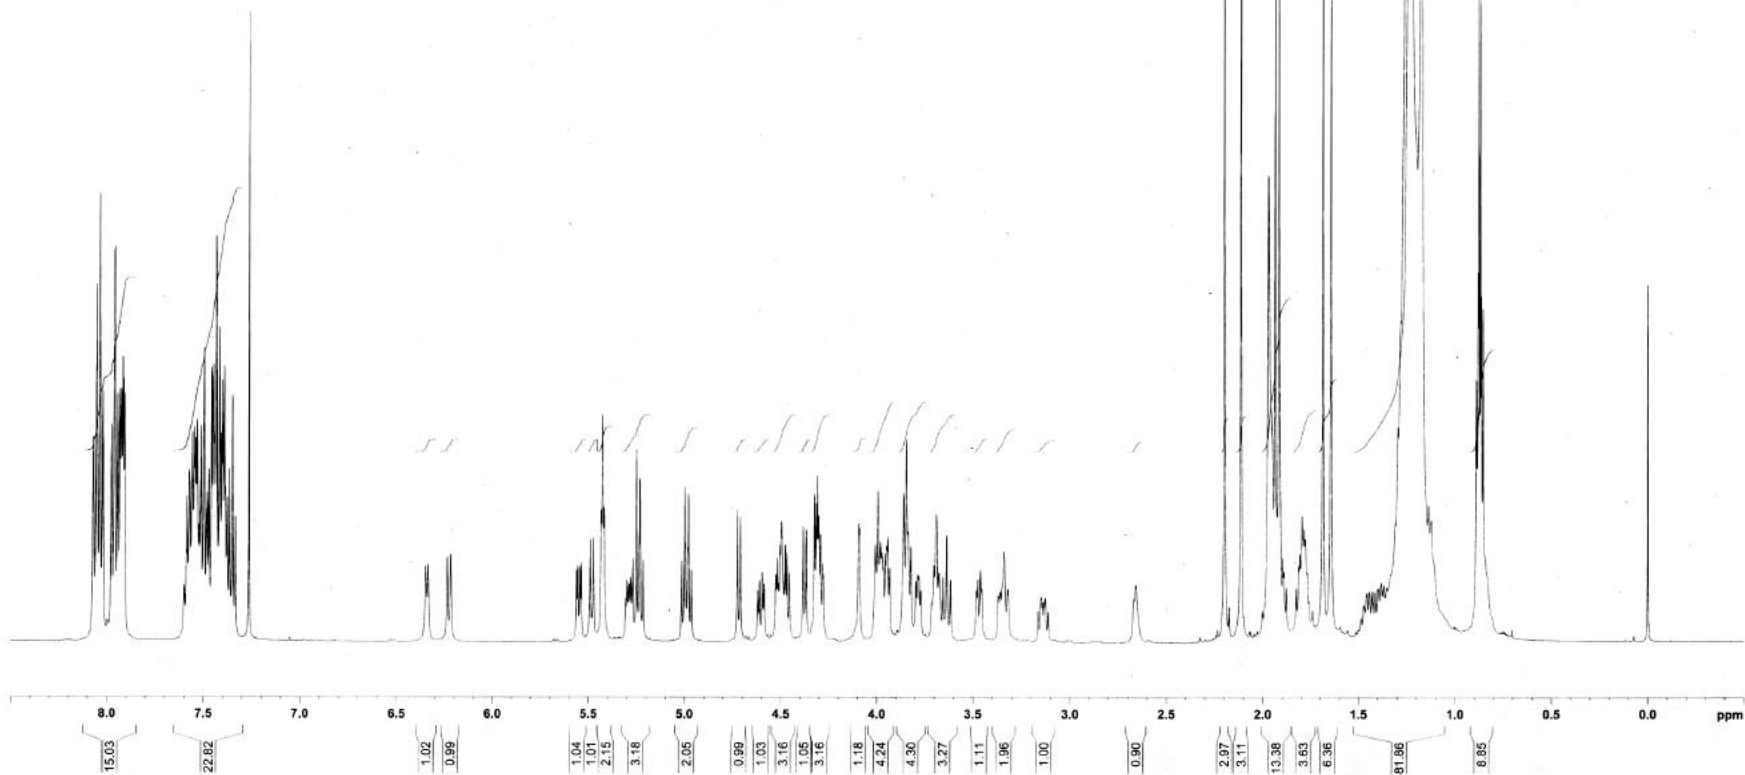

173.26  
172.93  
171.09  
170.50  
170.41  
170.38  
169.72  
166.27  
166.18  
166.16  
165.95  
165.89  
165.23  
164.82  
133.68  
133.53  
133.31  
133.26  
133.09  
132.93  
130.07  
129.88  
129.86  
129.80  
129.76  
129.72  
129.70  
129.64  
129.55  
129.37  
129.25  
129.13  
128.71  
128.60  
128.53  
128.44  
128.40  
128.28

101.48  
100.15  
99.08

77.50  
74.94  
74.74  
73.76  
73.27  
73.09  
72.96  
72.74  
72.37  
72.31

71.96  
71.83  
71.78  
71.26  
71.05  
69.69  
69.59  
67.00  
63.67  
62.46  
62.09  
61.98  
61.73  
61.58

36.32  
31.52  
29.74  
29.70  
29.65  
29.60  
29.57  
29.55  
29.50  
29.35  
29.24  
28.64  
25.50  
25.43  
22.96  
22.58  
20.84  
20.78  
20.59  
20.10  
14.11

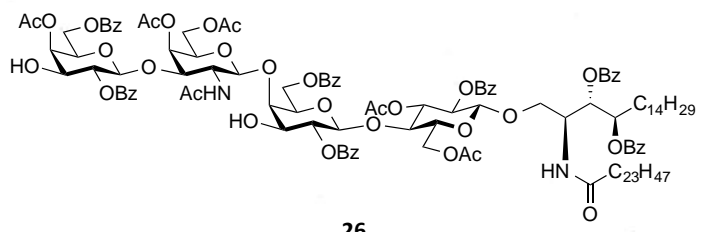

26

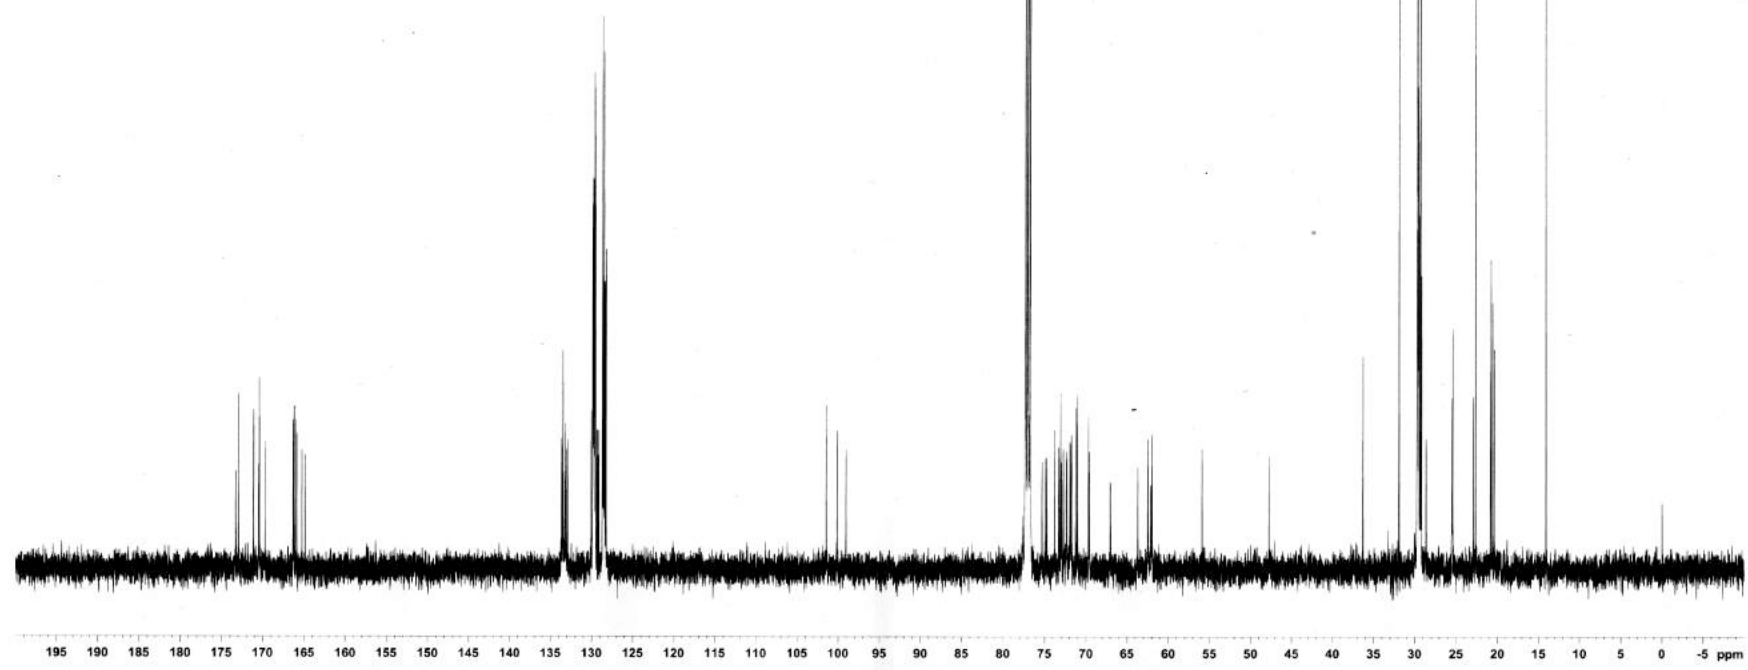

9.078  
8.062  
8.045  
8.038  
8.024  
7.994  
7.960  
7.925  
7.915  
7.912  
7.902  
7.899  
7.865  
7.862  
7.850  
7.833  
7.825  
7.821  
7.818  
7.815  
7.800  
7.790  
7.480  
7.481  
7.474  
7.465  
7.463  
7.460  
7.450  
7.444  
7.428  
7.420  
7.413  
7.403  
7.387  
7.371  
7.361  
7.345  
7.330  
6.841  
5.977  
5.772  
5.520  
5.513  
5.503  
5.497  
5.371  
5.366  
5.366  
5.288  
5.279  
5.271  
5.228  
5.209  
5.016  
4.962  
4.946  
4.937  
4.927  
4.774  
4.758  
4.575  
4.570  
4.551  
4.407  
4.391  
4.324  
4.309  
4.291  
4.284  
4.267  
3.999  
3.978  
3.835  
3.811  
3.788  
3.777  
3.641  
3.633  
3.463  
2.970  
2.962  
2.955  
2.948  
2.940  
2.122  
2.075  
1.927  
1.917  
1.802  
1.790  
1.778  
1.766  
1.742  
1.682  
1.662  
1.418  
1.405  
1.392  
1.376  
1.373  
1.255  
1.182  
1.167  
1.153  
0.891  
0.882  
0.878  
0.869  
0.864  
0.855

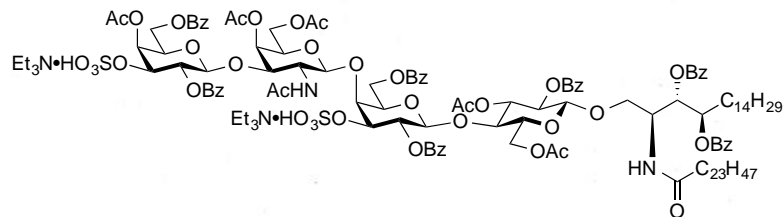

27

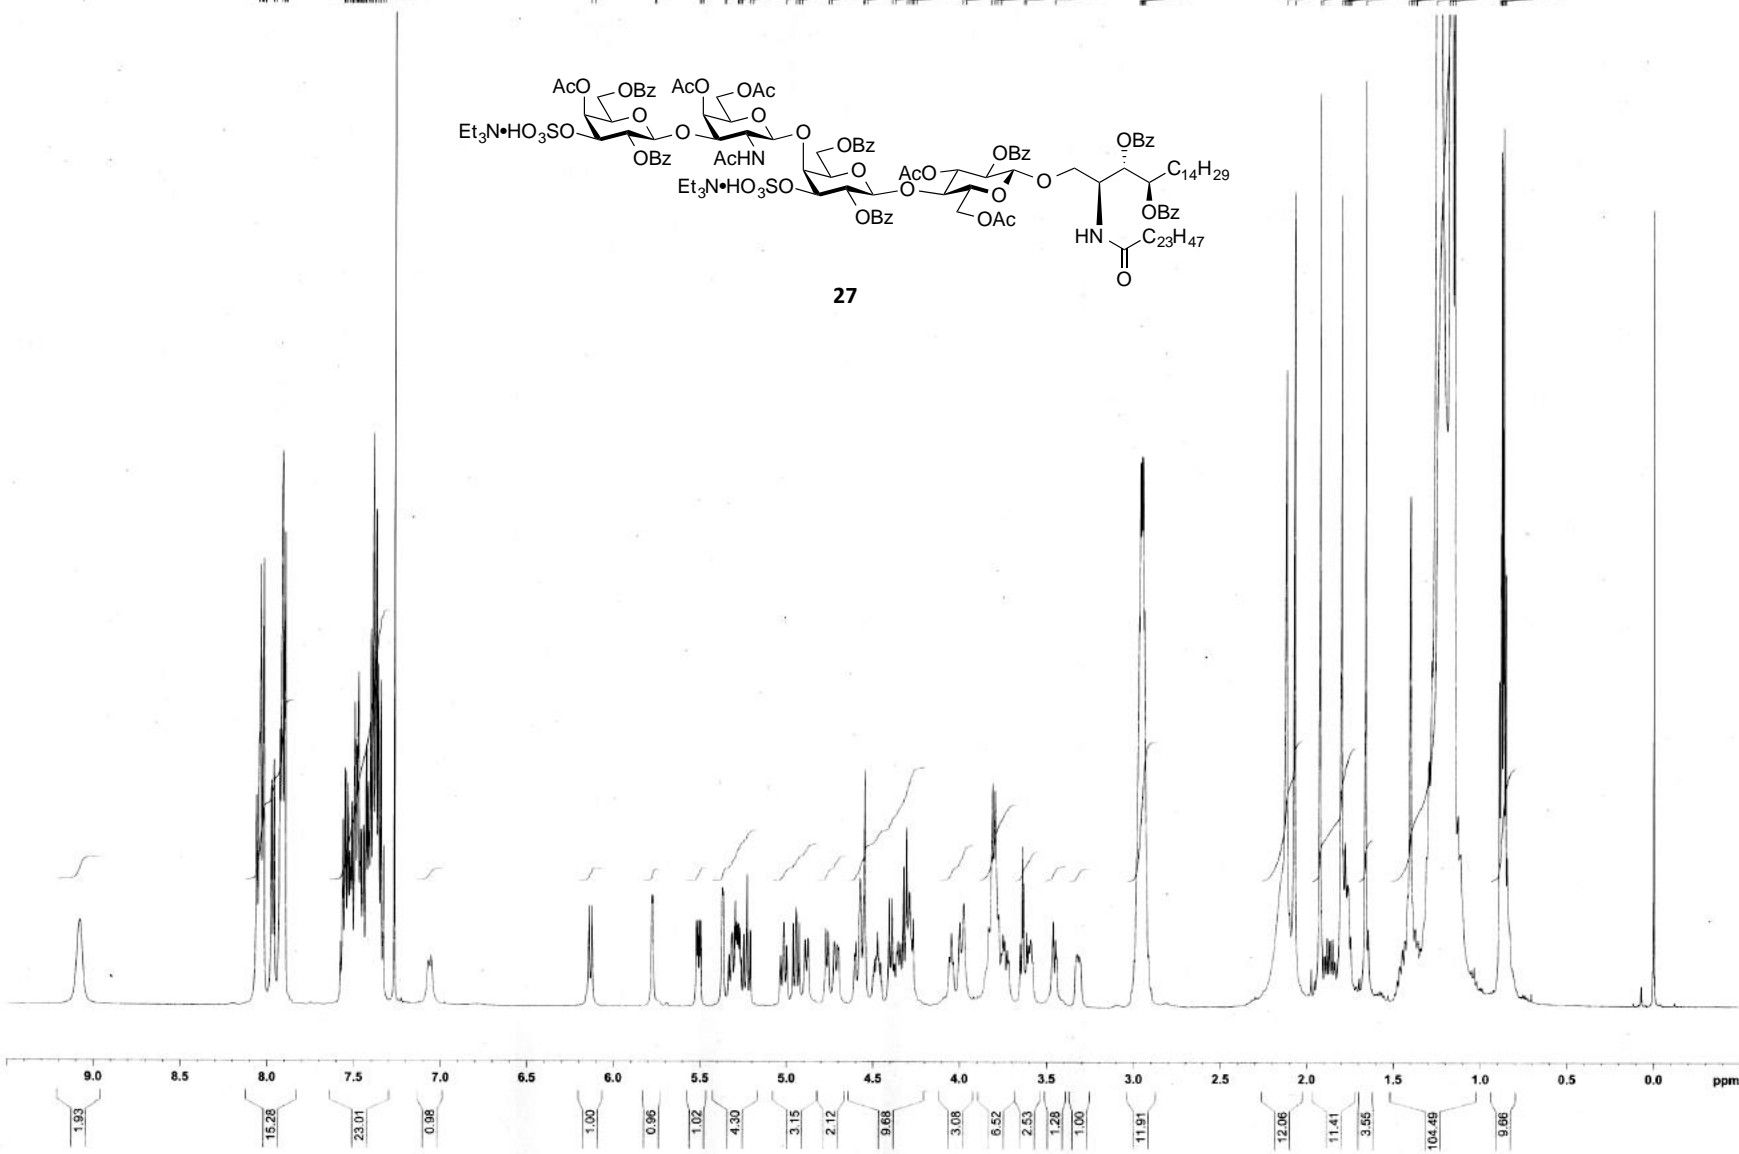



173.49  
172.92  
170.66  
170.39  
170.14  
170.01  
169.50  
166.13  
166.09  
165.98  
165.42  
165.35  
165.14  
164.93

133.47  
133.37  
133.14  
132.93  
130.15  
130.05  
130.03  
129.78  
129.73  
129.68  
129.65  
129.60  
129.44  
128.11  
128.64  
128.56  
128.52  
128.42  
128.39  
128.29

102.25  
102.06  
100.96  
99.91

77.60  
76.09  
74.92  
73.65  
72.77  
72.53  
72.31  
71.84  
71.25  
70.53  
70.20  
69.92  
69.47  
68.66  
66.85  
64.13  
62.77  
62.54  
61.74  
62.41  
47.74  
46.34  
36.30  
31.92  
29.74  
29.70  
28.65  
28.60  
28.56  
28.54  
29.49  
29.35  
29.23  
28.72  
25.47  
25.42  
22.68  
20.85  
20.77  
20.66  
20.62  
14.11  
8.57

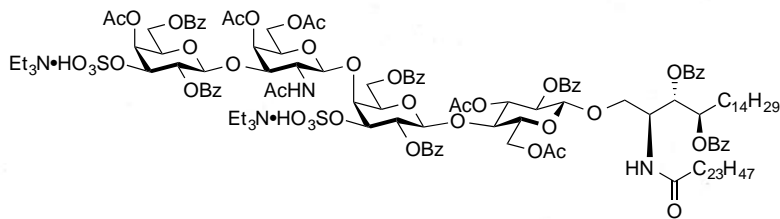

27

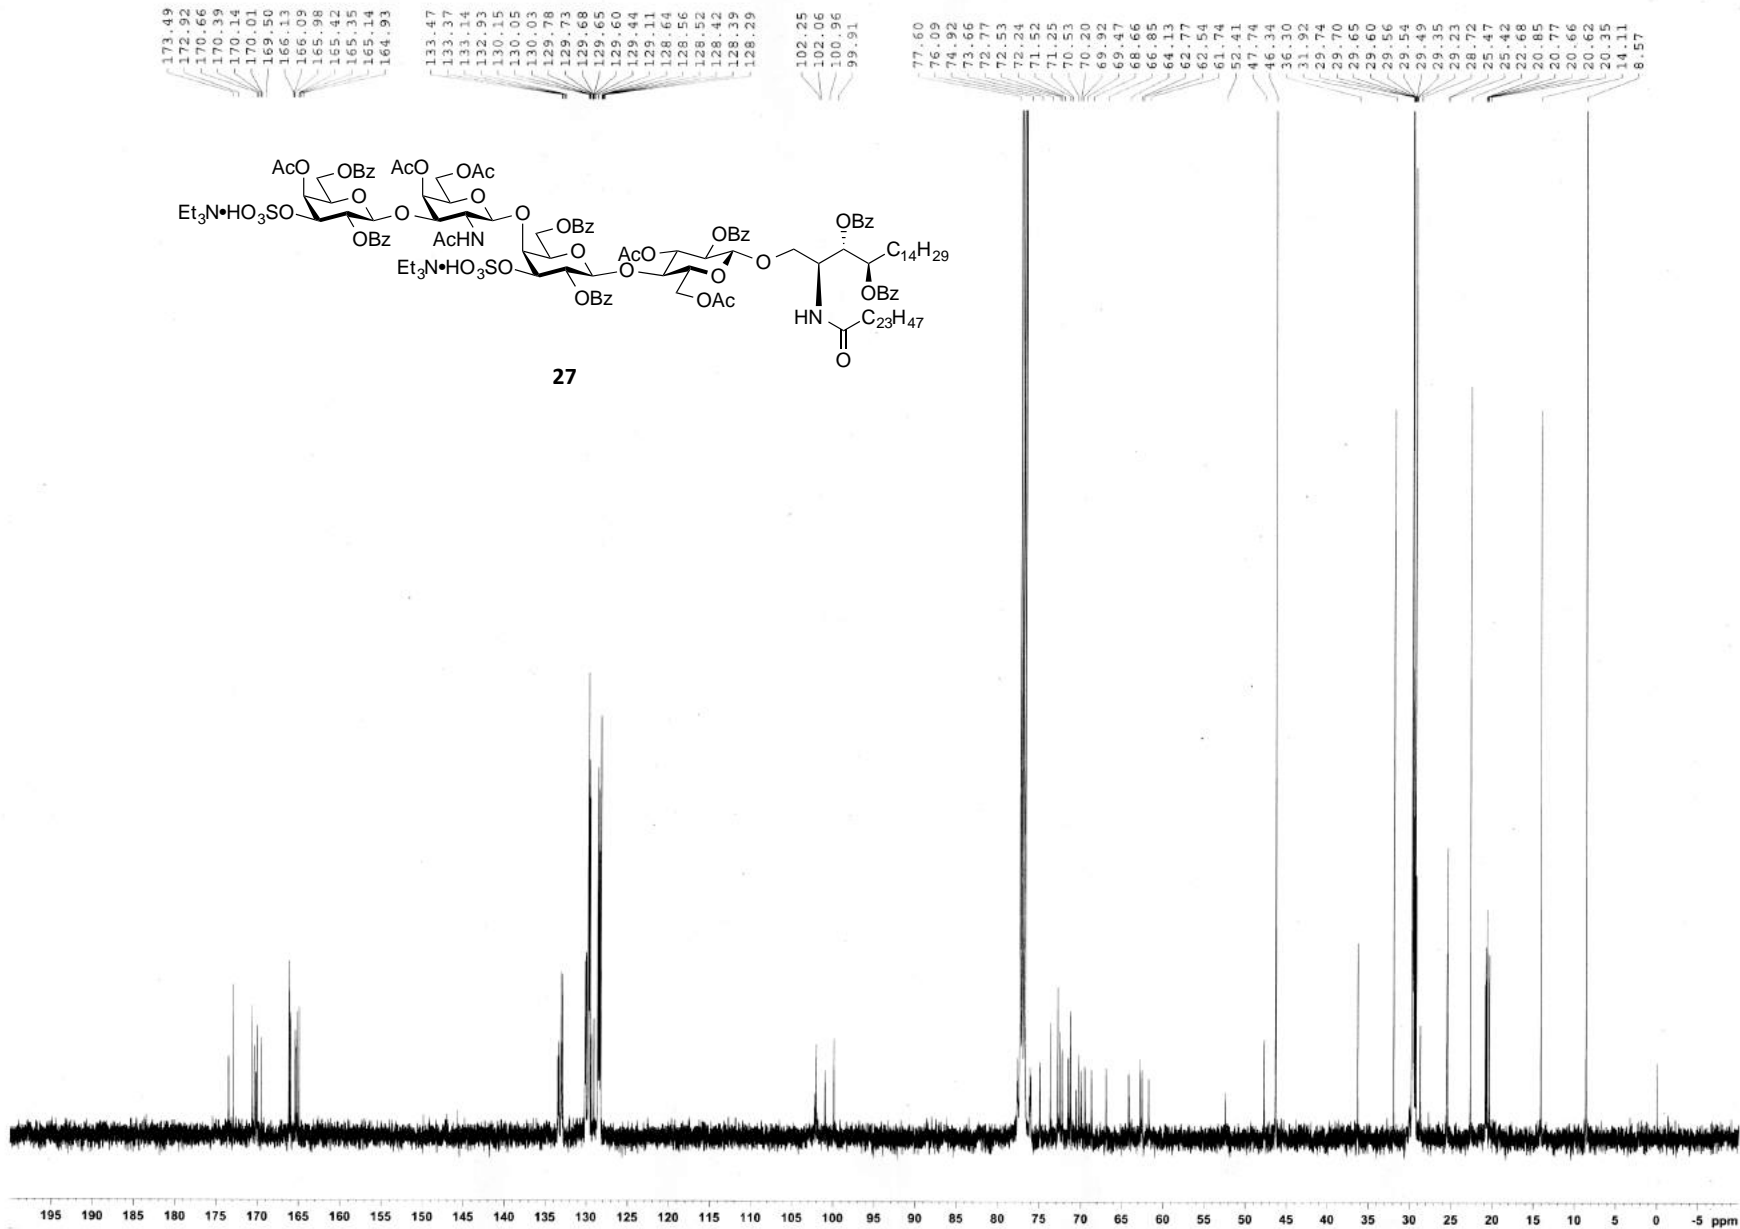

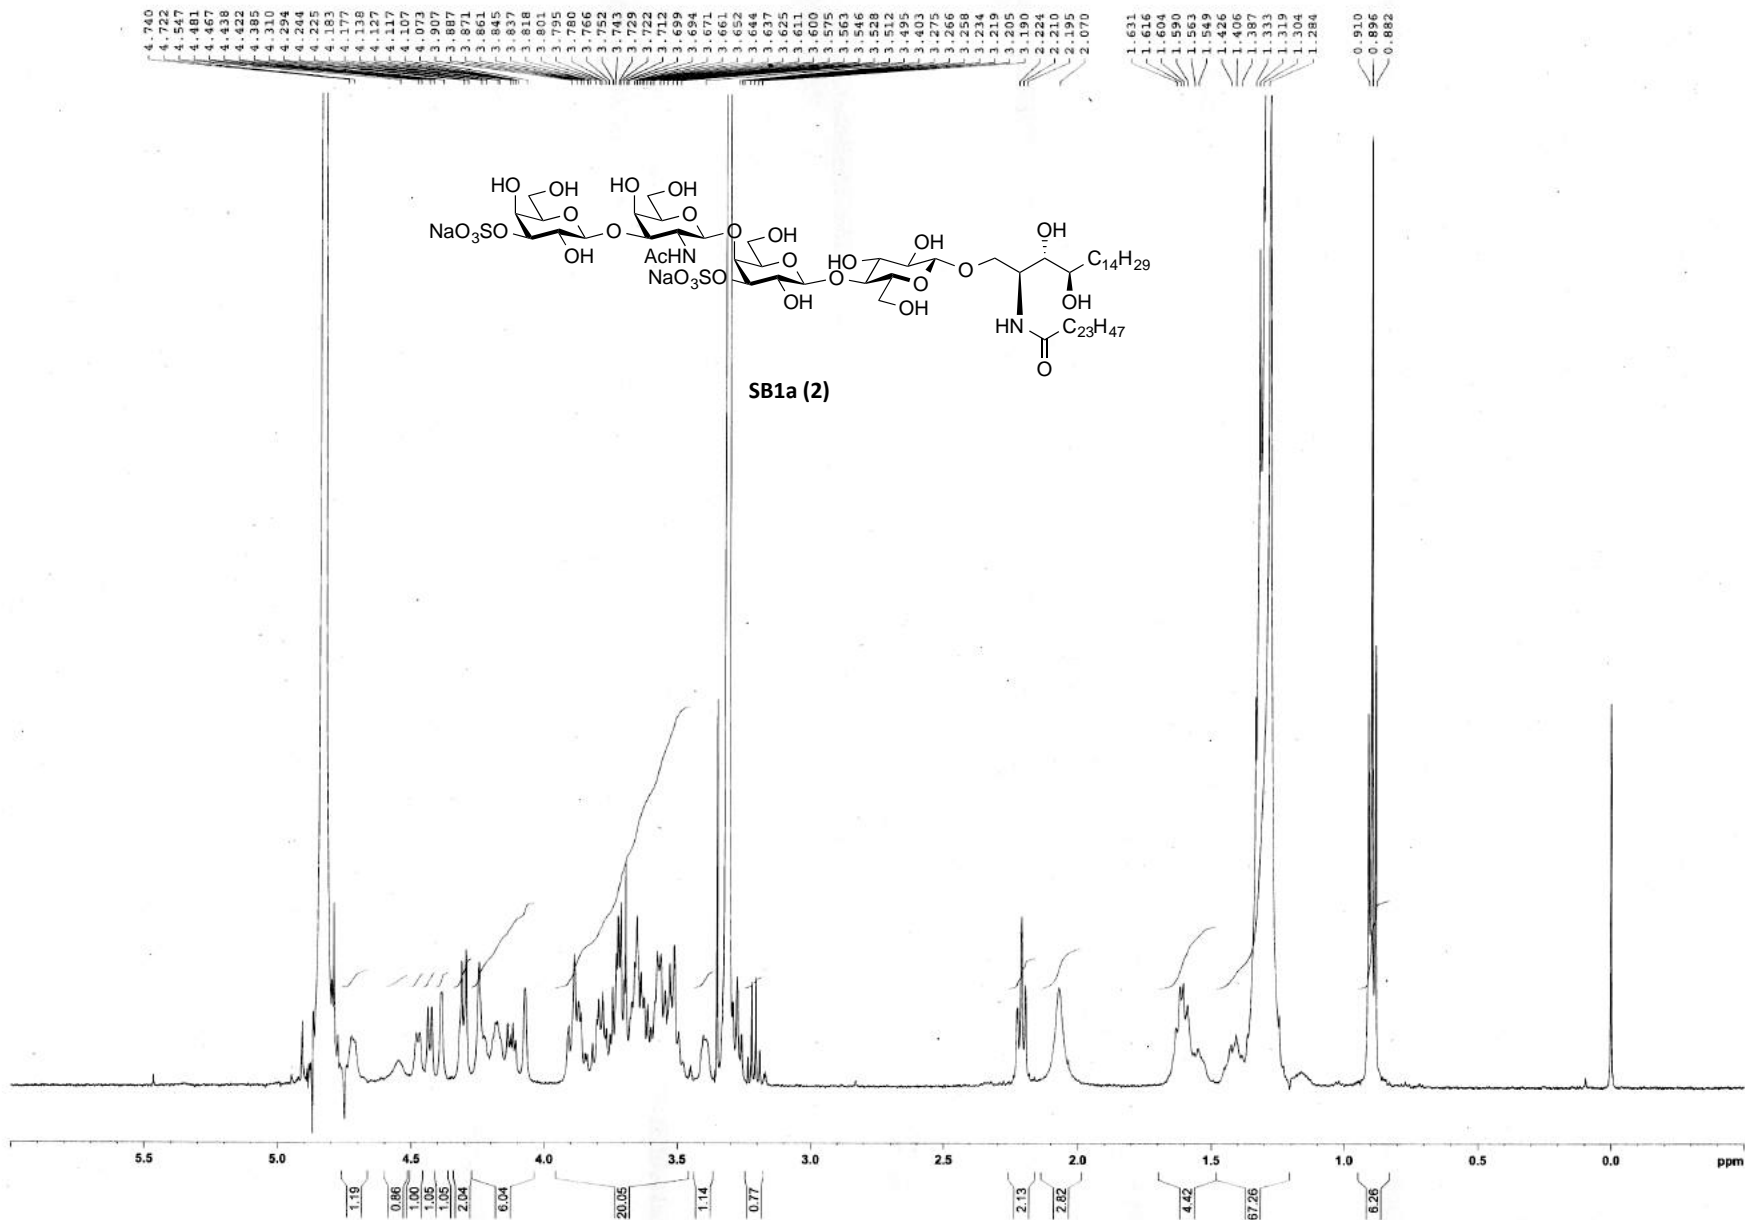

zgig30

171.96  
170.43

104.33  
103.57  
103.54  
103.43  
80.80  
80.25  
79.12  
77.92  
75.73  
75.10  
74.85  
74.83  
74.75  
74.30  
73.88  
73.46  
73.25  
70.56  
69.79  
69.55  
69.05  
69.02  
67.27  
66.16  
60.83  
60.82  
60.25  
60.18  
59.42  
59.42  
50.51  
50.22  
50.13  
39.97  
35.56  
35.51  
31.35  
31.32  
30.73  
29.27  
29.27  
29.20  
29.19  
29.15  
29.09  
29.04  
29.03  
29.01  
29.00  
8

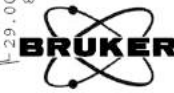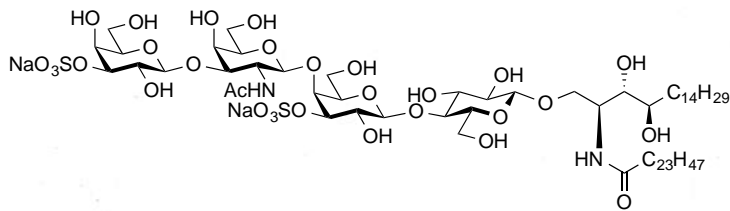

SB1a (2)

Current Data Parameters  
NAME SB1a  
EXPNO 100013  
PROCNO 1

F2 - Acquisition Parameters  
Date\_ 20140925  
Time 10.56  
INSTRUM spect  
PROBHD 5 mm CPTCI 1H-  
PULPROG zgig30  
TD 65356  
SOLVENT DMSO  
NS 32459  
DS 8  
SWH 48676.922 Hz  
FIDRES 0.735616 Hz  
AQ 0.6797024 sec  
RG 203  
OR 10.400 usec  
DE 18.90 usec  
TE 293.2 K  
D1 2.00000000 sec  
D11 0.03000000 sec  
TD0 1

\*\*\*\*\* CHANNEL f1 \*\*\*\*\*  
SFO1 201.2179973 MHz  
NUC1 13C  
P1 10.40 usec  
PLW1 159.58999634 W

\*\*\*\*\* CHANNEL f2 \*\*\*\*\*  
SFO2 800.1532006 MHz  
NUC2 1H  
CPOPRGf2 waltz16  
PCPD2 100.00 usec  
PLW2 7.53359985 W  
PLW12 0.03616600 W

F2 - Processing parameters  
SI 32768  
SF 201.1979694 MHz  
WDW EM  
SSB 0  
LB 1.00 Hz  
GB 0  
PC 1.40

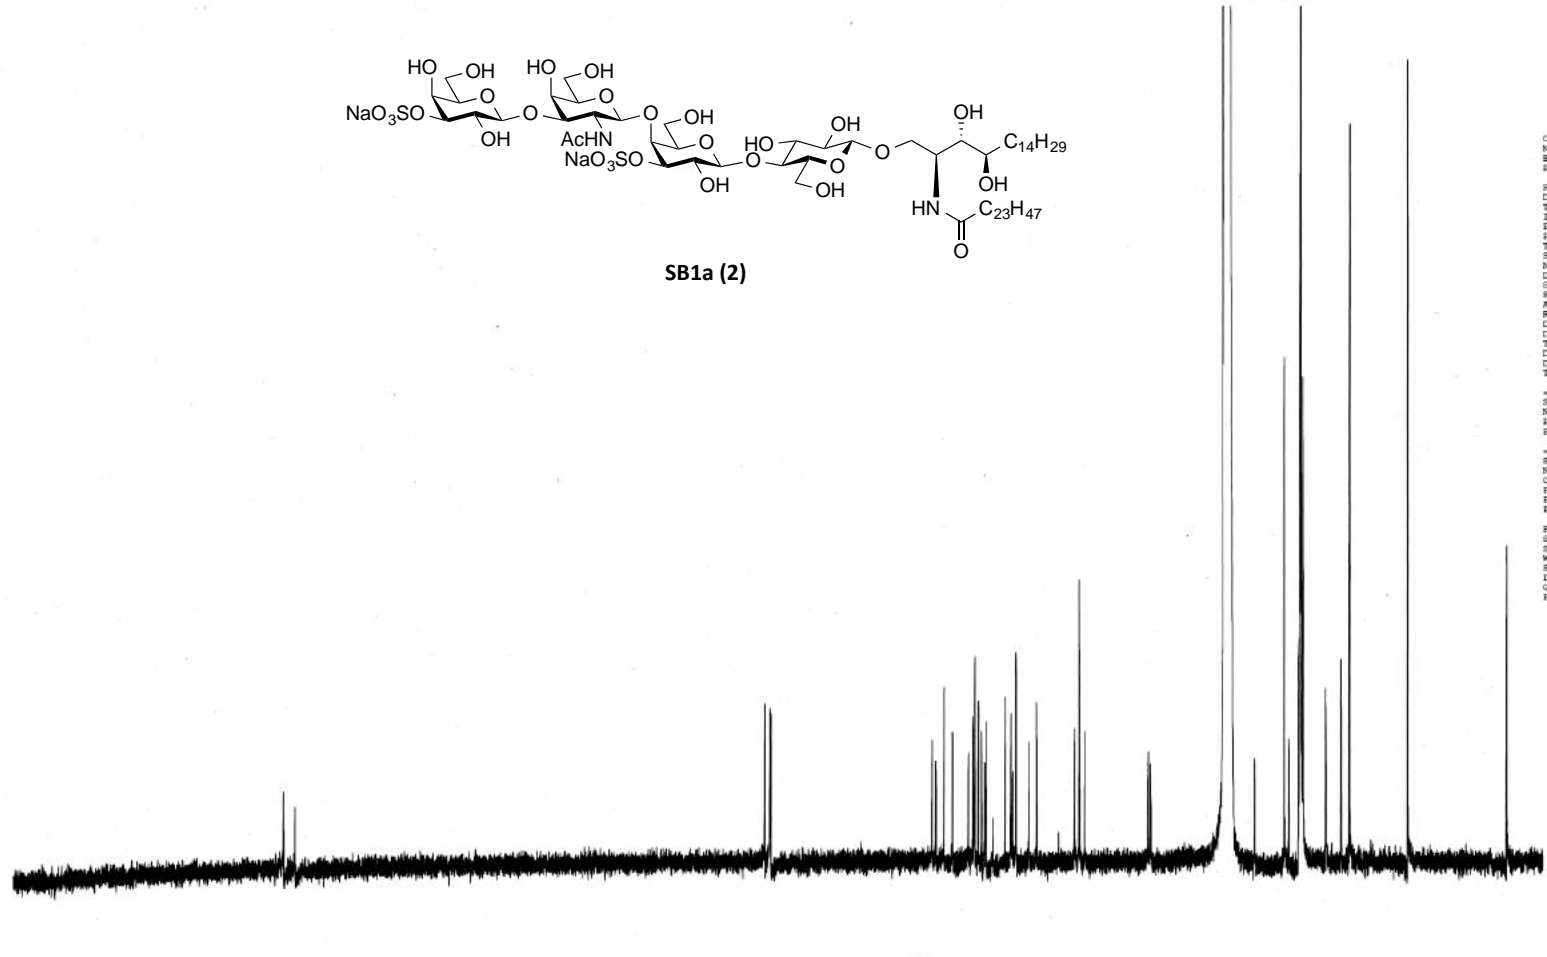

200 190 180 170 160 150 140 130 120 110 100 90 80 70 60 50 40 30 20 10 ppm
